# Supplementary material for: Potent and selective α-glucosidase inhibition by coumarin–triazole conjugates: design, in vivo evaluation, and computational insights
Source: Royal Society of Chemistry journal article supplement (doi:10.1039/d6ra01115b), 2026-06-01
Supplement: d6ra01115b1.pdf [file d6ra01115b1.pdf]

## **Potent and Selective $\alpha$ -Glucosidase Inhibition by Coumarin–Triazole Conjugates: Design, *In Vivo* Evaluation, and Computational Insights**

Mahdis Sadeghi Moghadam <sup>1</sup>, Bahareh Bayati <sup>2</sup>, Fariba Peytam <sup>1,2</sup>, Maryam Norouzbahari <sup>3</sup>, Hayrettin Ozan Gülcan <sup>4</sup>, Somayeh Mojtabavi <sup>5</sup>, Fahimeh Ghasemi <sup>6</sup>, Seyed Esmaeil Sadat-Ebrahimi <sup>1</sup>, Maliheh Barazandeh Tehrani <sup>1</sup>, Vahid Sheibani <sup>7</sup>, Loghman Firoozpour <sup>1,2,\*</sup>, Alireza Foroumadi <sup>1,2,\*</sup>

<sup>1</sup> Department of Medicinal Chemistry, Faculty of Pharmacy, Tehran University of Medical Sciences, Tehran, Iran

<sup>2</sup> Drug Design and Development Research Center, The Institute of Pharmaceutical Sciences (TIPS), Tehran University of Medical Sciences, Tehran, Iran

<sup>3</sup> Faculty of Pharmacy, Final International University, Catalkoy, Kyrenia via Mersin 10 Turkey

<sup>4</sup> Faculty of Pharmacy, Eastern Mediterranean University, Famagusta, TRNC, via Mersin 10 Turkey

<sup>5</sup> Department of Pharmaceutical Biotechnology, Faculty of Pharmacy, Tehran University of Medical Sciences, Tehran, Iran

<sup>6</sup> Department of Medical Biotechnology, School of Advanced Technologies in Medicine, Tehran University of Medical Sciences, Tehran, Iran

<sup>7</sup> Neuroscience Research Center, Institute of Neuropharmacology, Kerman University of Medical Sciences, Kerman, Iran

**\* Corresponding authors:** Dr. Loghman Firoozpour ([firoozpour@gmail.com](mailto:firoozpour@gmail.com)), Dr. Alireza Foroumadi ([aforoumadi@yahoo.com](mailto:aforoumadi@yahoo.com))

<sup>1</sup>H NMR spectrum of 2-oxo-N-((1-(2-oxo-2-(phenylamino)ethyl)-1H-1,2,3-triazol-4-yl)methyl)-2H-chromene-3-carboxamide (**12a**)

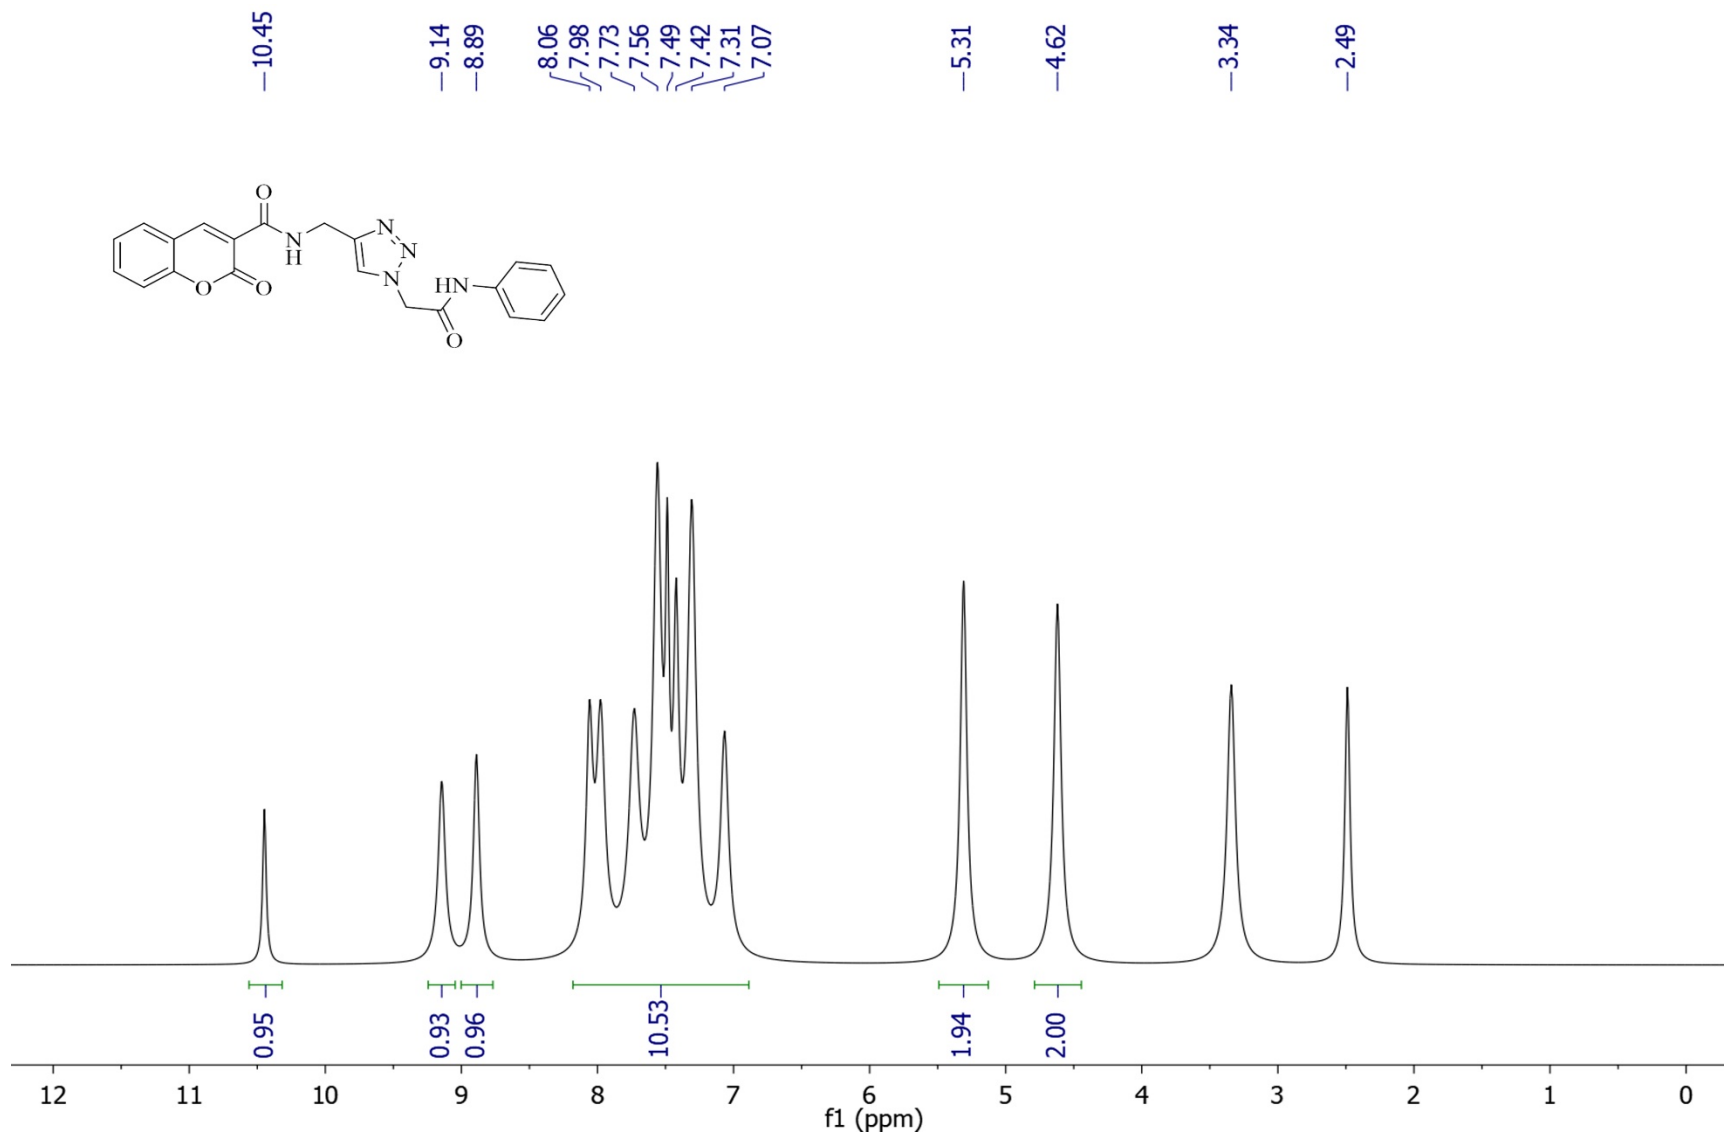

$^{13}\text{C}$  NMR spectrum of 2-oxo-N-((1-(2-oxo-2-(phenylamino)ethyl)-1H-1,2,3-triazol-4-yl)methyl)-2H-chromene-3-carboxamide (**12a**)

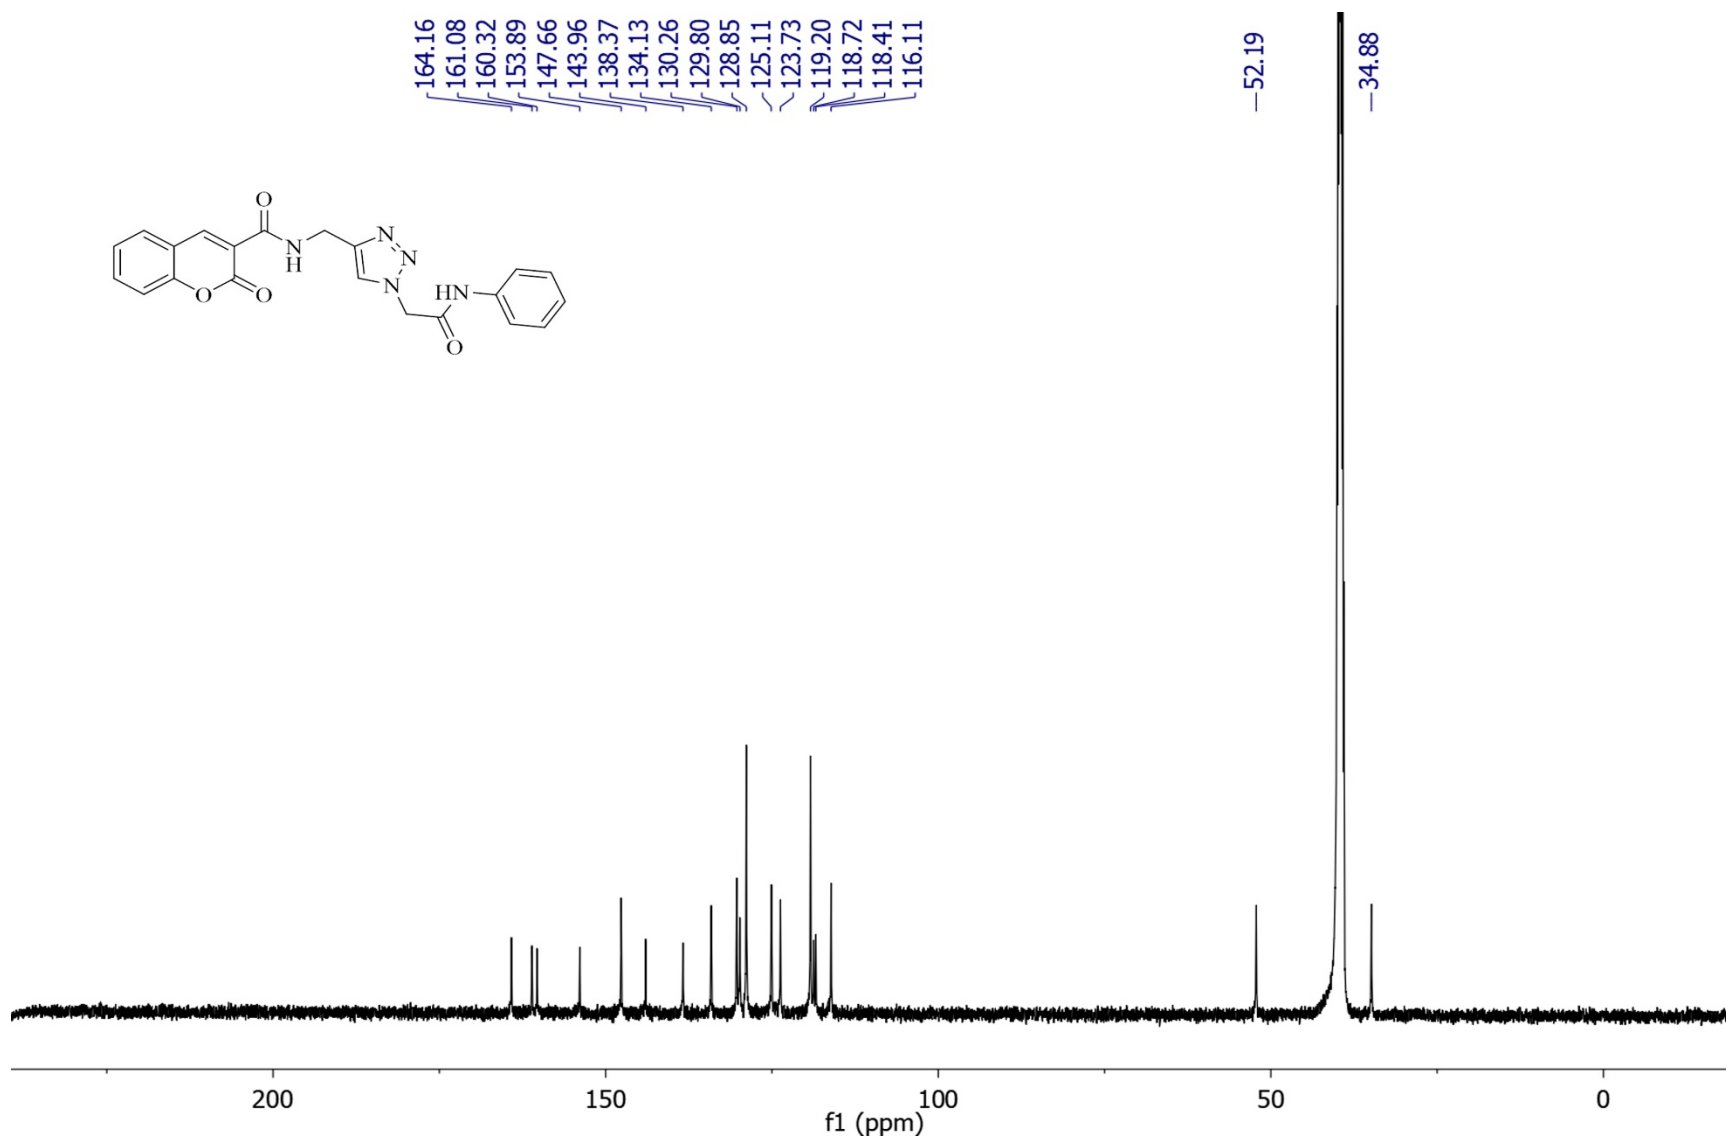

<sup>1</sup>H NMR spectrum of 2-oxo-N-((1-(2-oxo-2-(o-tolylamino)ethyl)-1H-1,2,3-triazol-4-yl)methyl)-2H-chromene-3-carboxamide (**12b**)

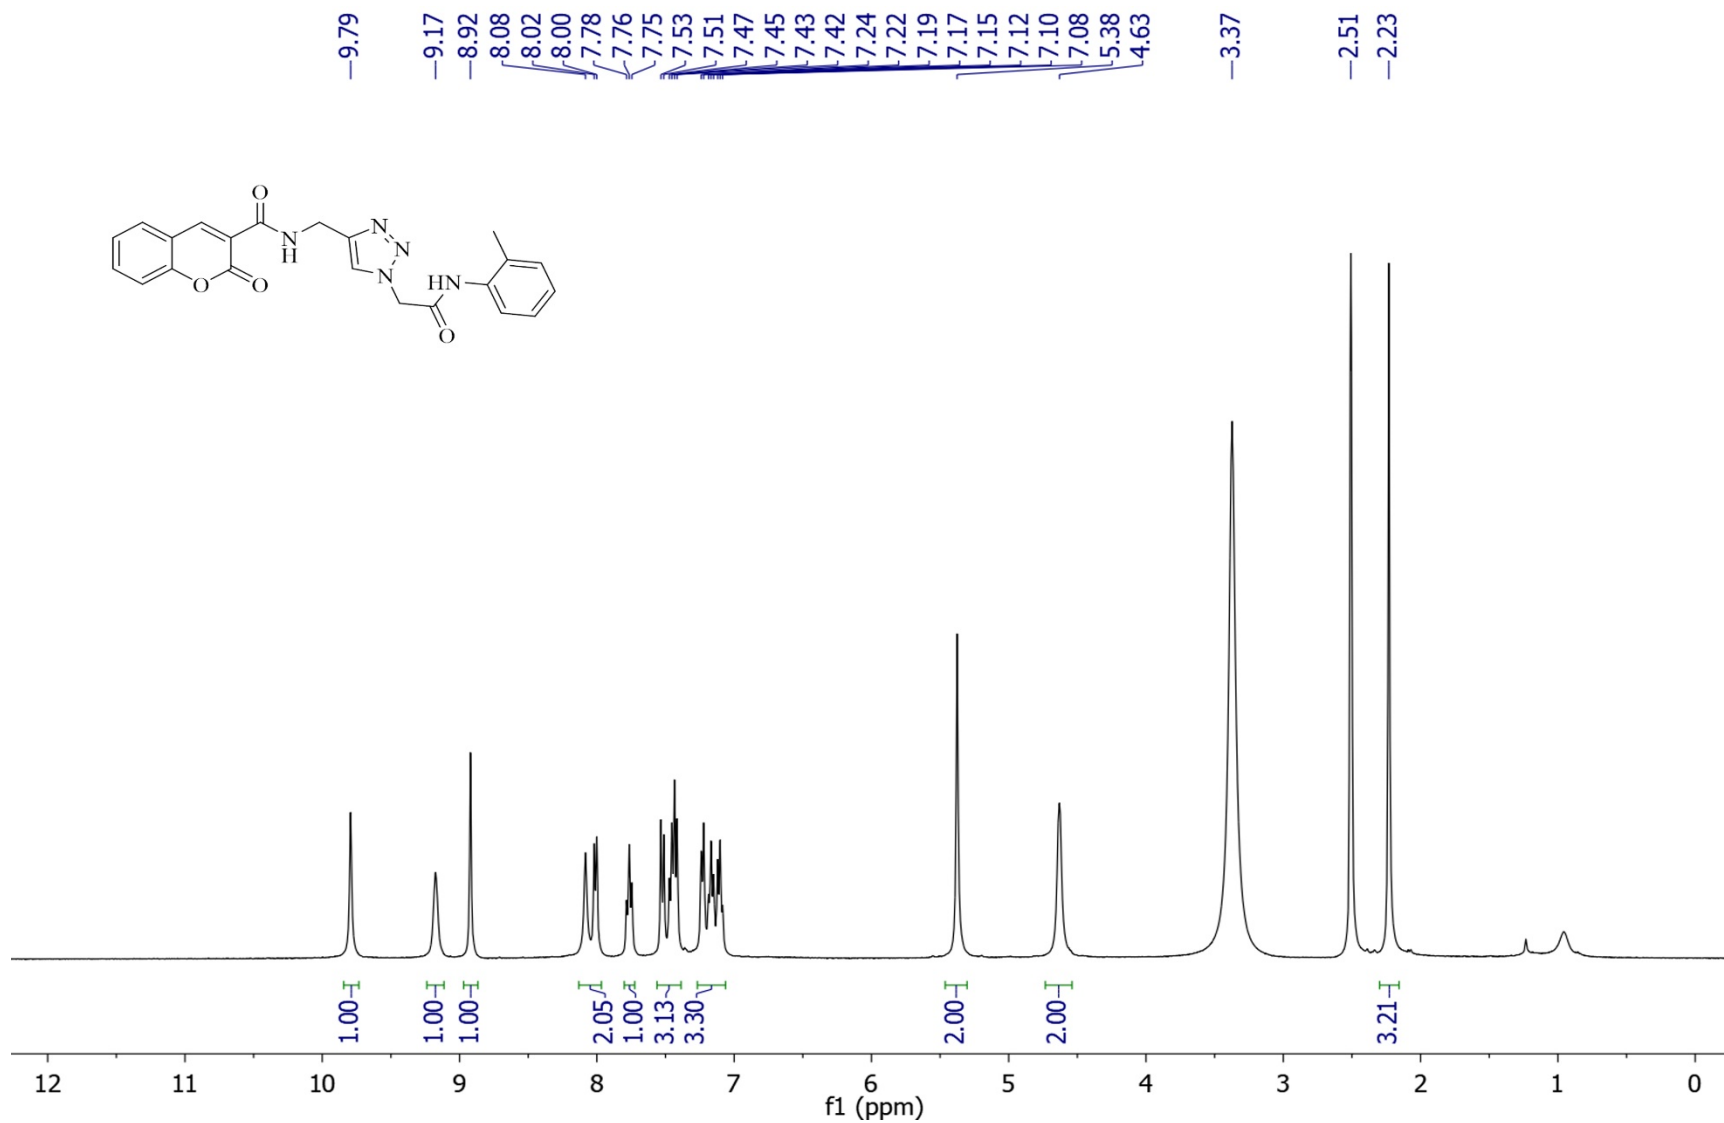

<sup>13</sup>C NMR spectrum of 2-oxo-N-((1-(2-oxo-2-(o-tolylamino)ethyl)-1H-1,2,3-triazol-4-yl)methyl)-2H-chromene-3-carboxamide (**12b**)

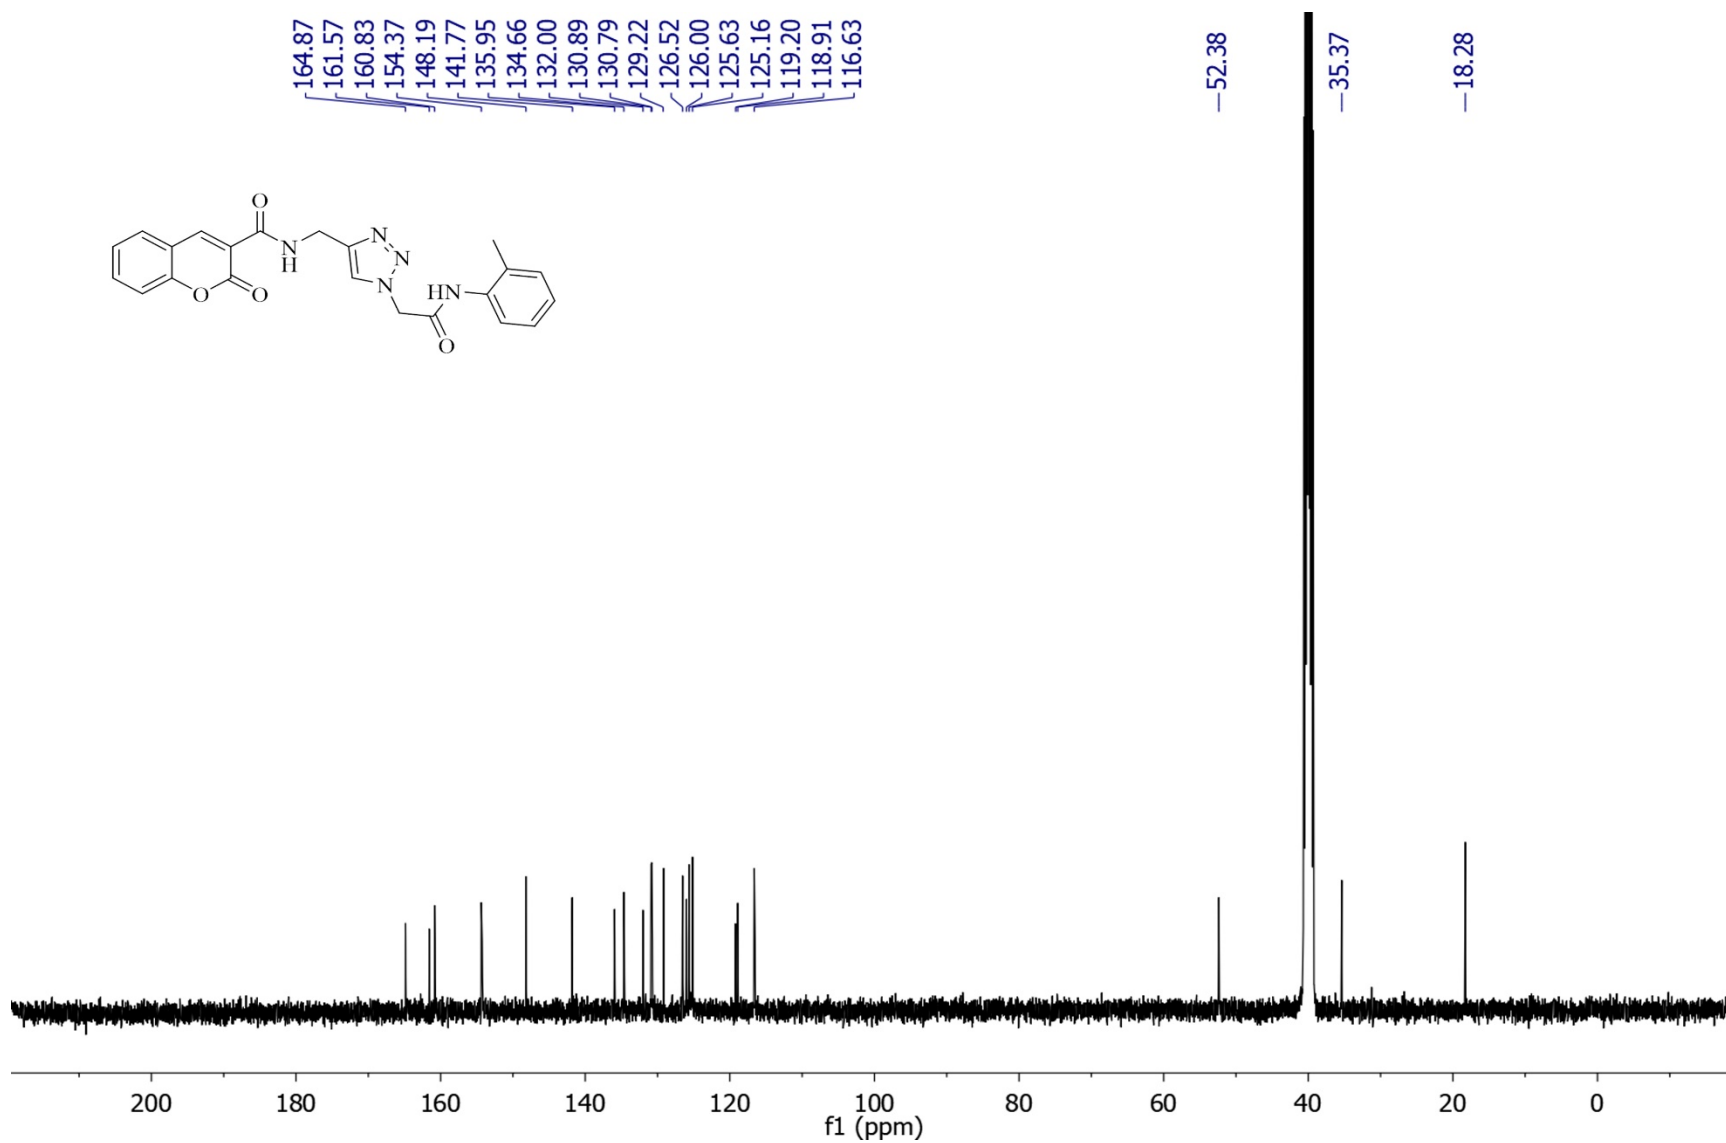

<sup>1</sup>H NMR spectrum of 2-oxo-N-((1-(2-oxo-2-(m-tolylamino)ethyl)-1H-1,2,3-triazol-4-yl)methyl)-2H-chromene-3-carboxamide (**12c**)

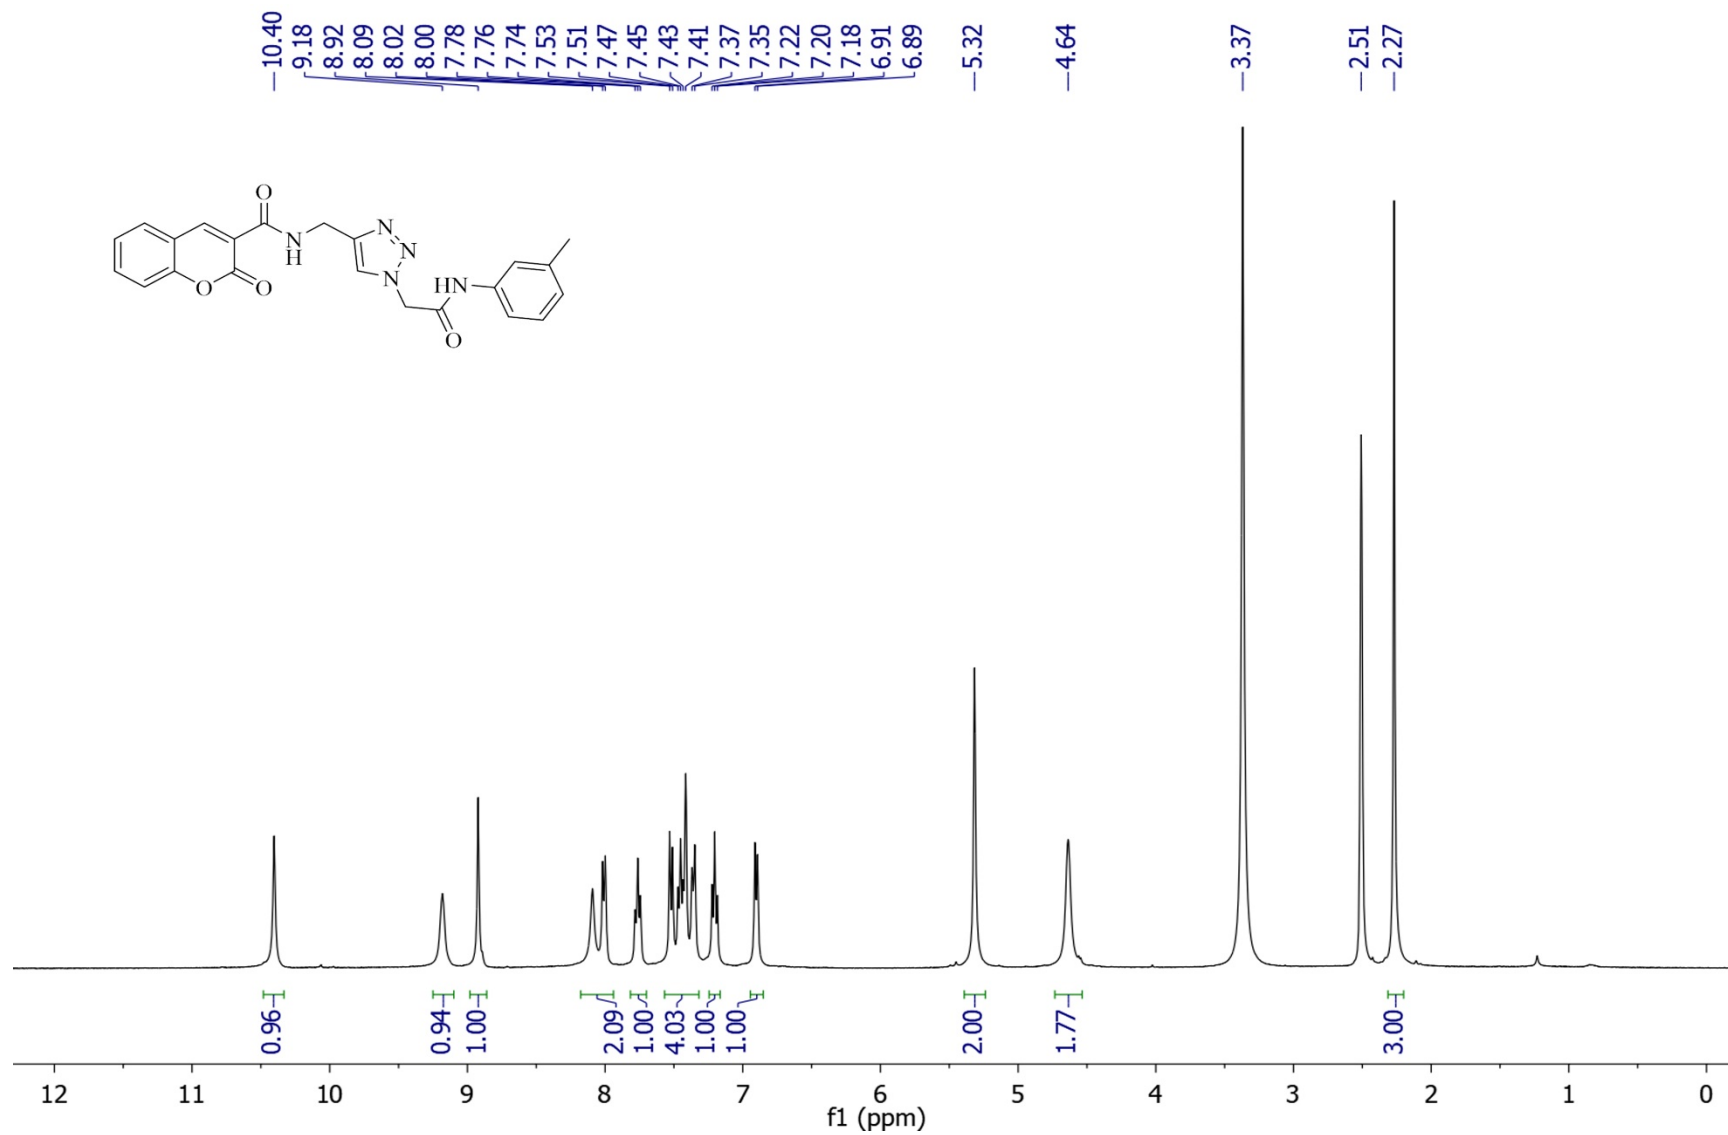

$^{13}\text{C}$  NMR spectrum of 2-oxo-N-((1-(2-oxo-2-(m-tolylamino)ethyl)-1H-1,2,3-triazol-4-yl)methyl)-2H-chromene-3-carboxamide (**12c**)

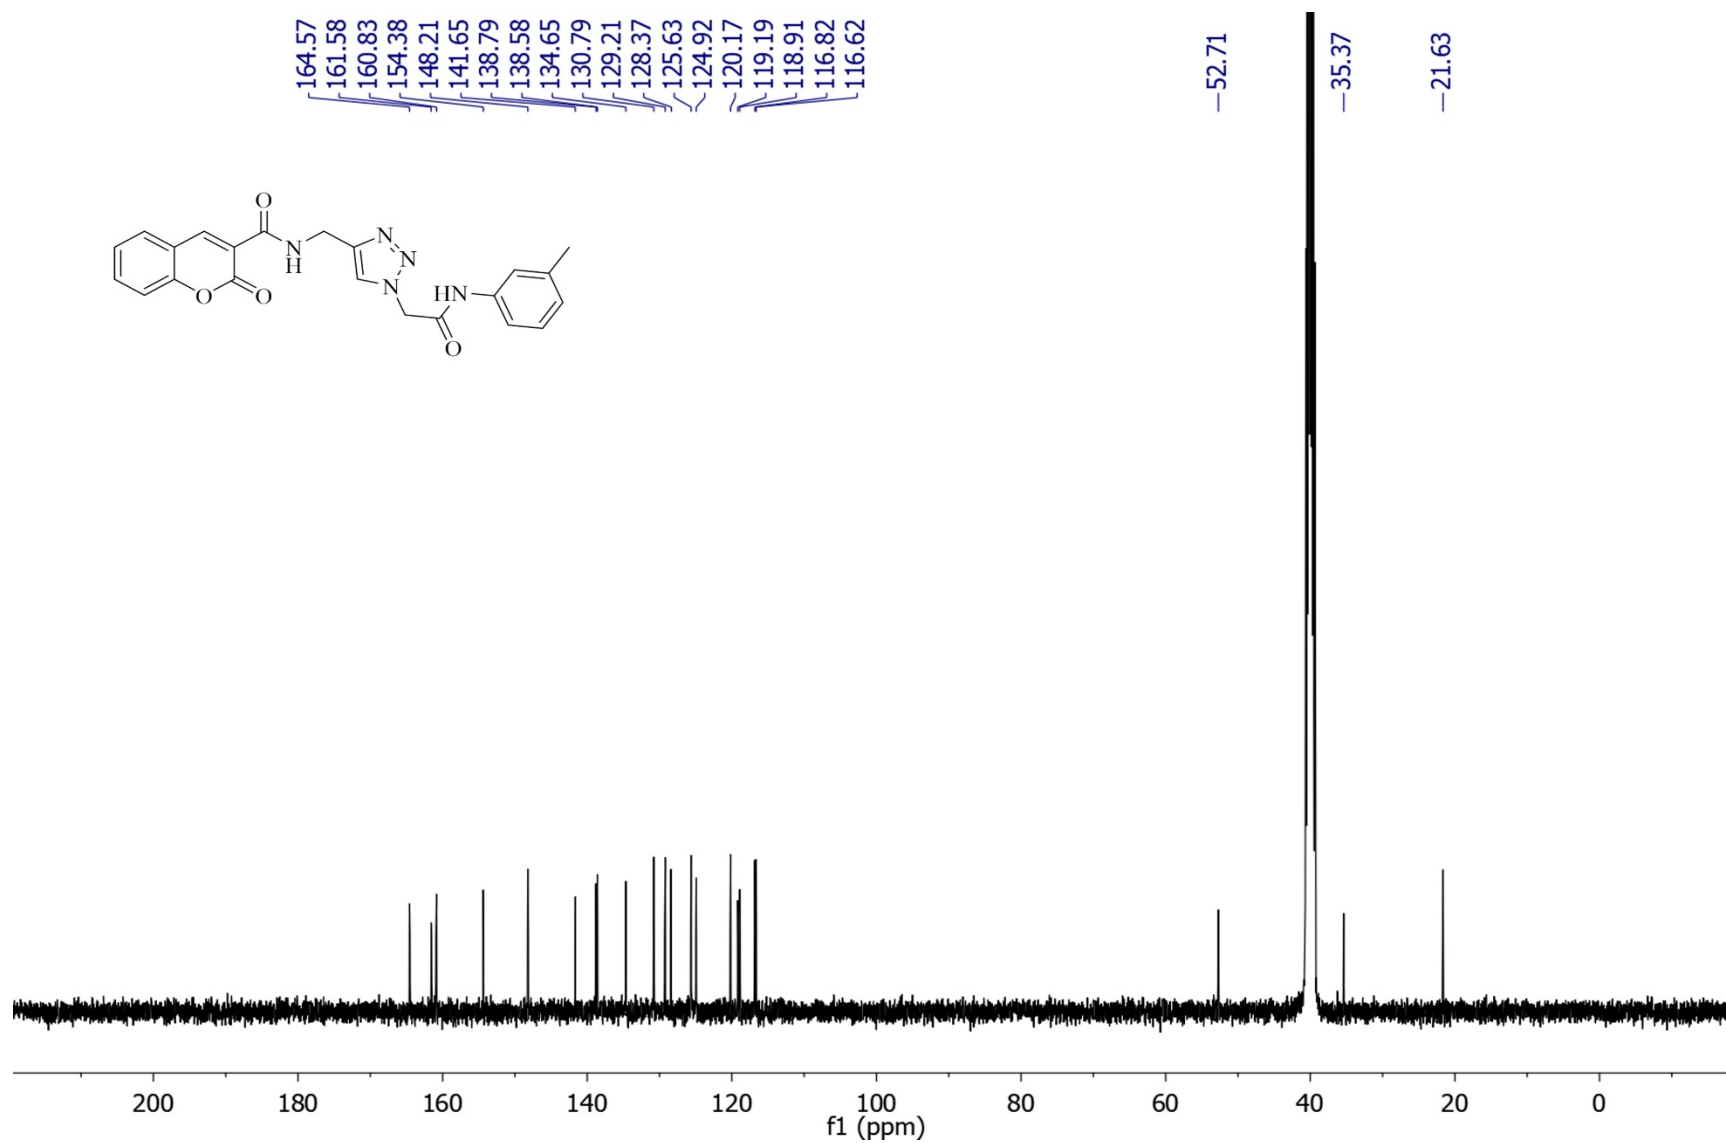

<sup>1</sup>H NMR spectrum of 2-oxo-N-((1-(2-oxo-2-(p-tolylamino)ethyl)-1H-1,2,3-triazol-4-yl)methyl)-2H-chromene-3-carboxamide (**12d**)

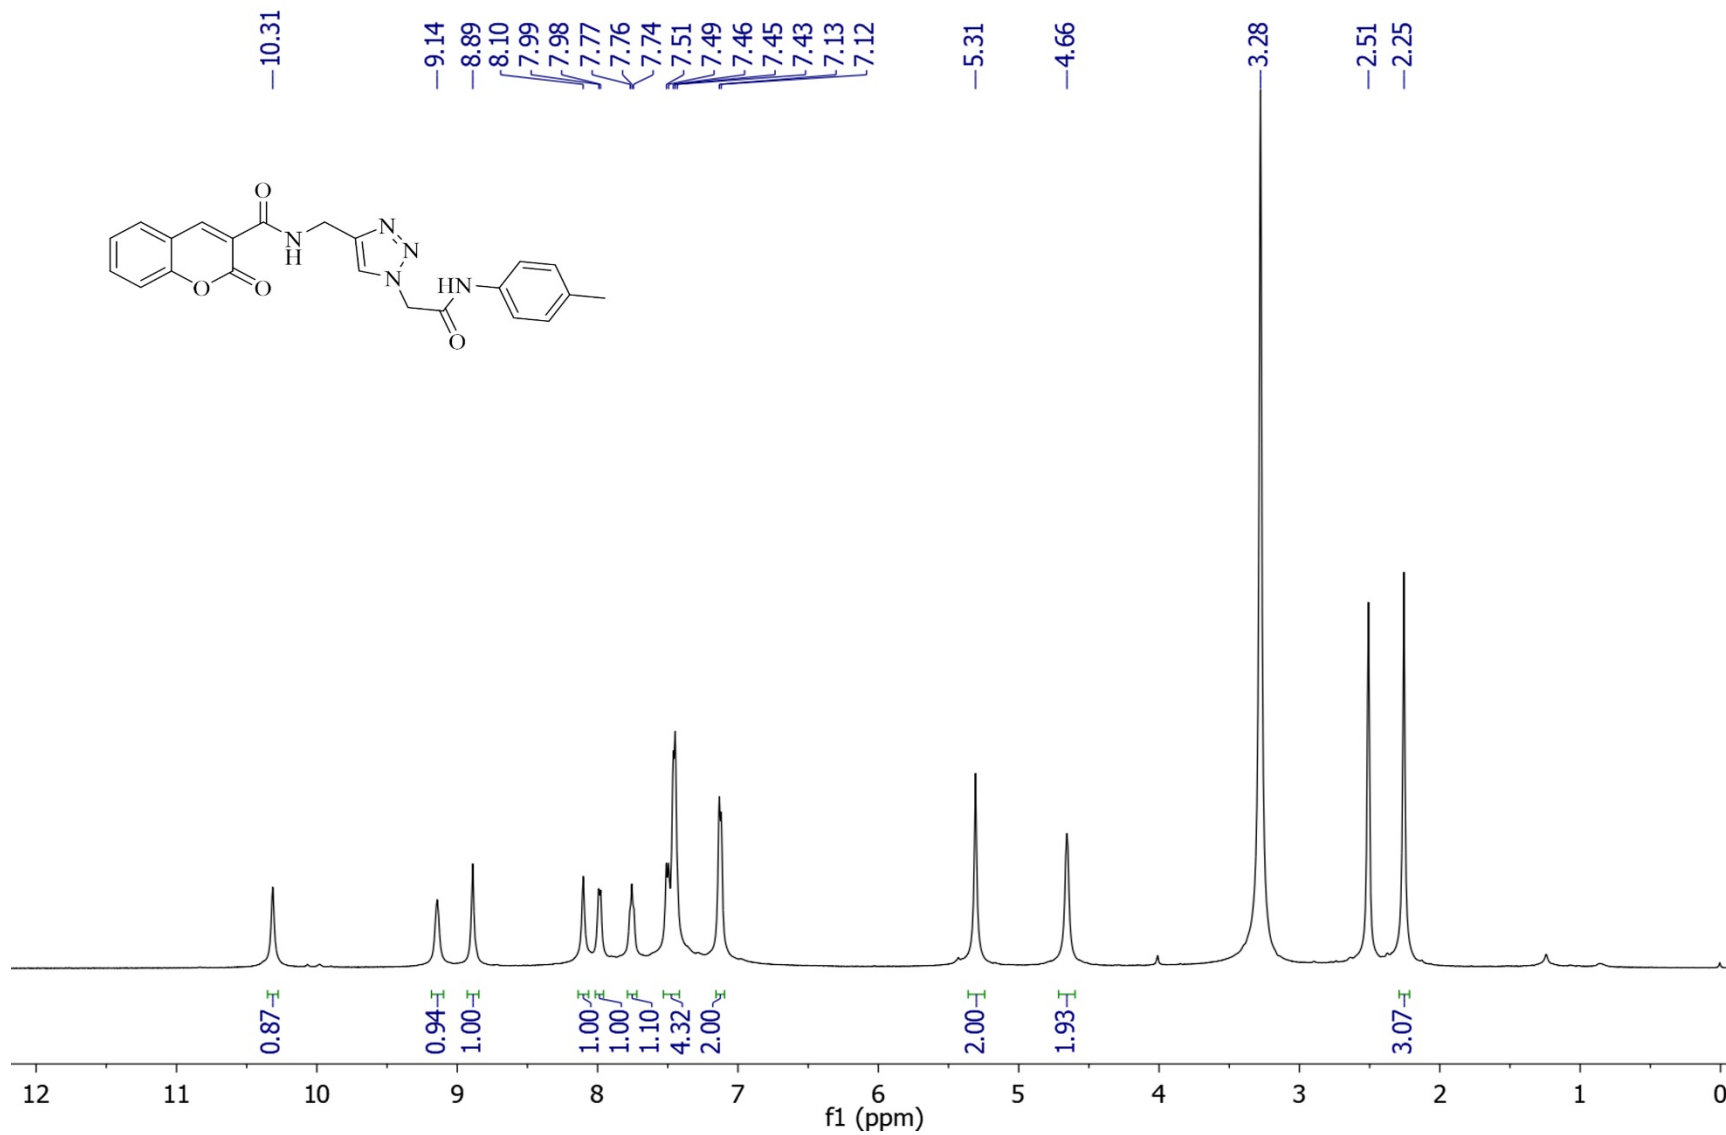

$^{13}\text{C}$  NMR spectrum of 2-oxo-N-((1-(2-oxo-2-(p-tolylamino)ethyl)-1H-1,2,3-triazol-4-yl)methyl)-2H-chromene-3-carboxamide (**12d**)

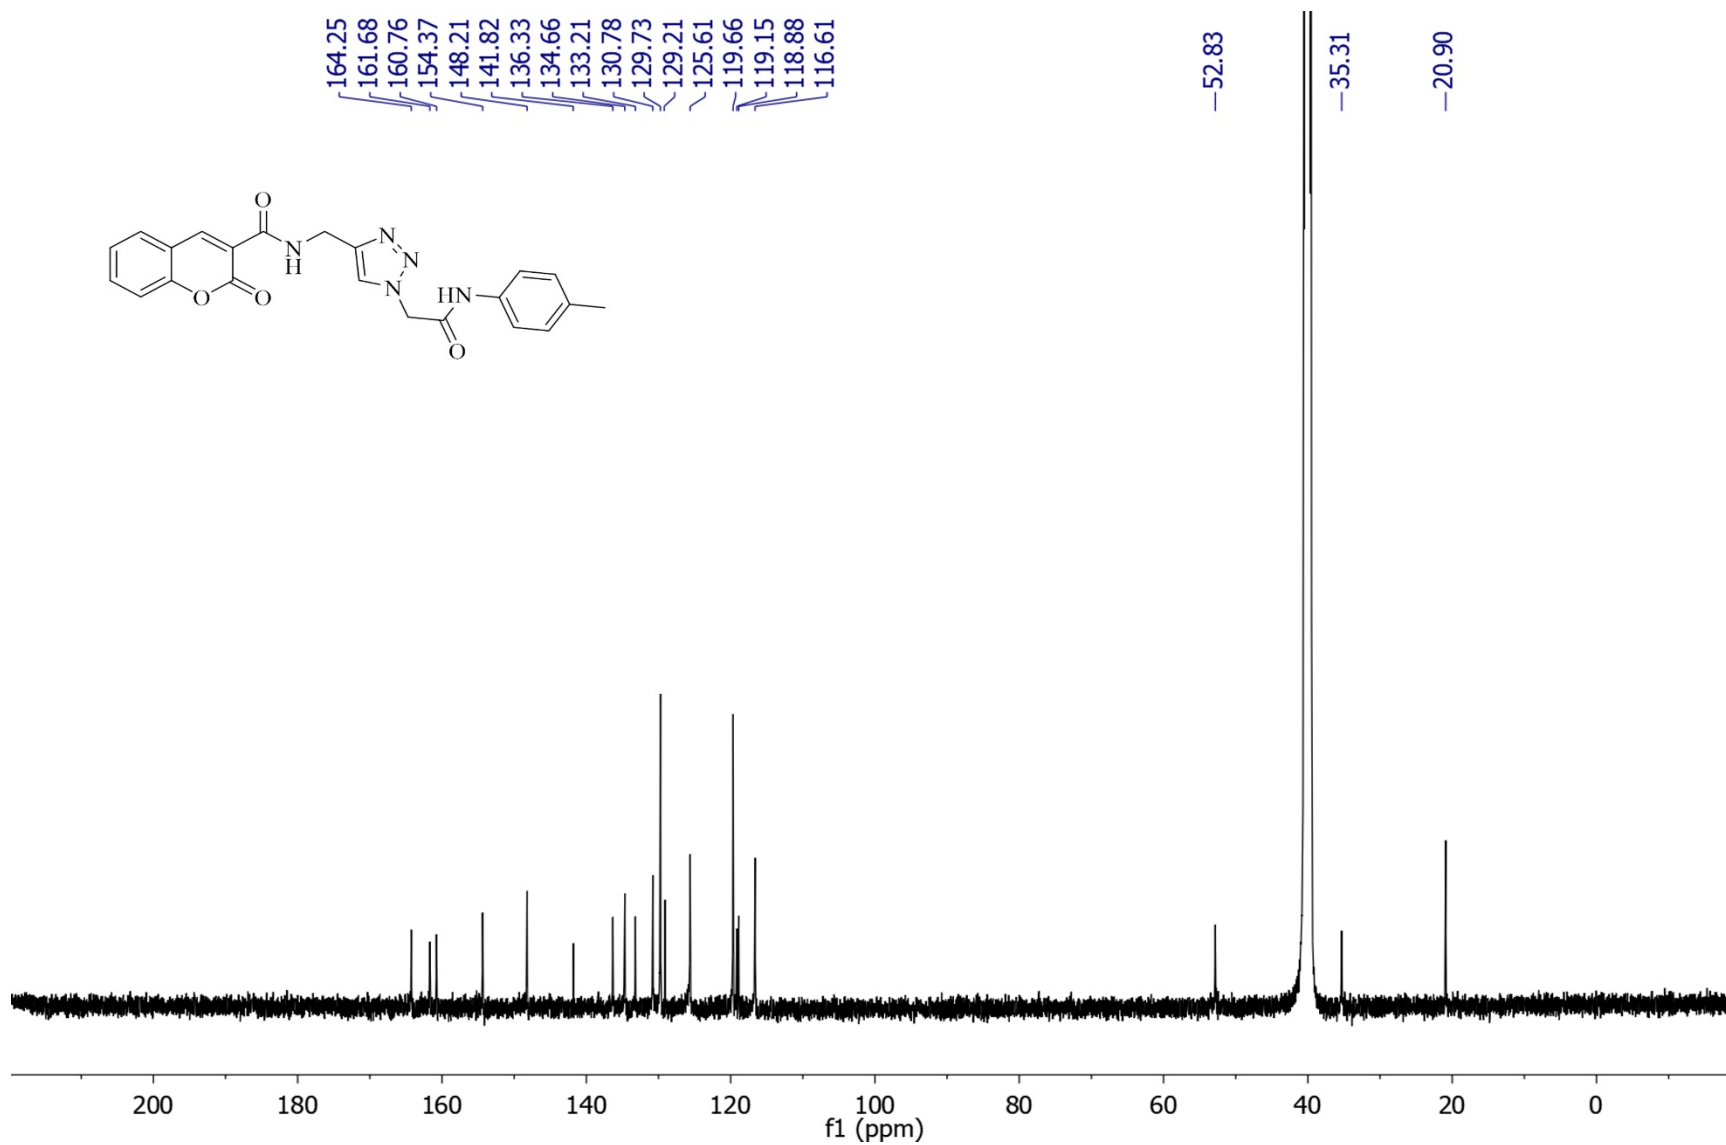

<sup>1</sup>H NMR spectrum of N-((1-(2-((2-methoxyphenyl)amino)-2-oxoethyl)-1H-1,2,3-triazol-4-yl)methyl)-2-oxo-2H-chromene-3-carboxamide (**12e**)

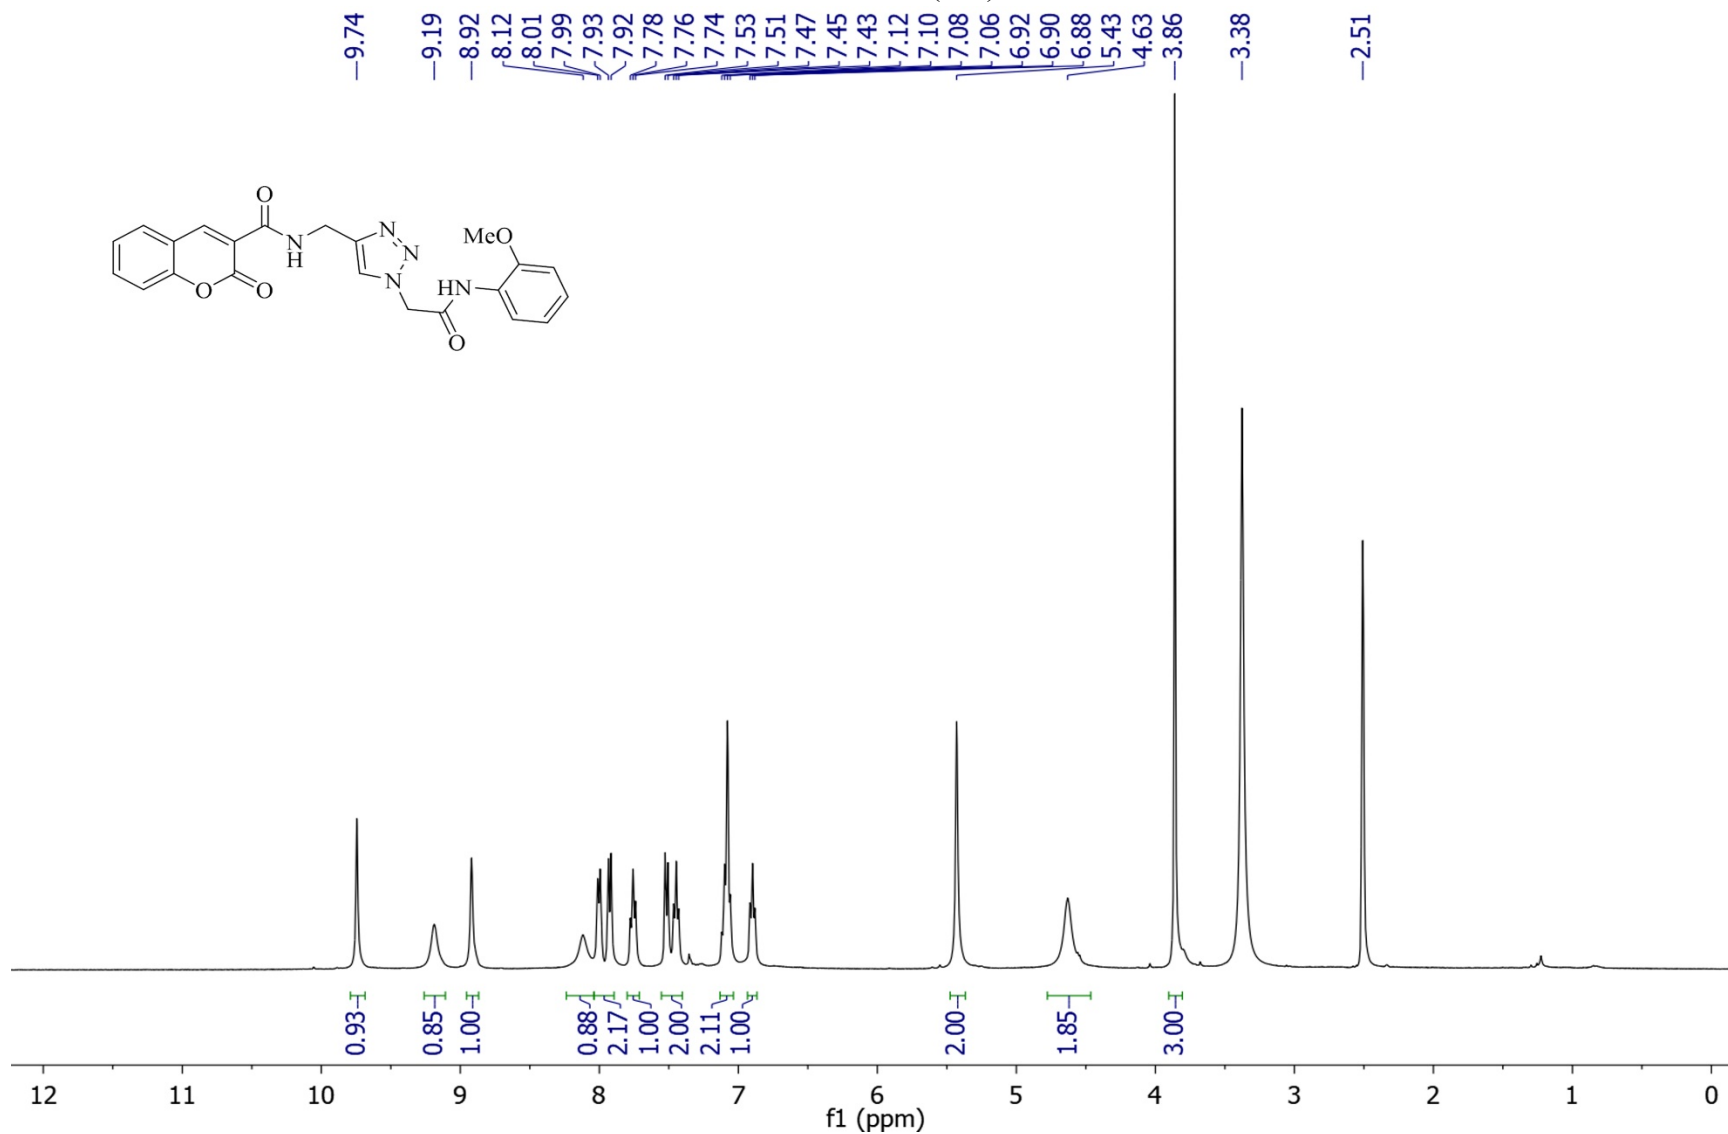

$^{13}\text{C}$  NMR spectrum of N-((1-(2-((2-methoxyphenyl)amino)-2-oxoethyl)-1H-1,2,3-triazol-4-yl)methyl)-2-oxo-2H-chromene-3-carboxamide (**12e**)

164.90  
161.58  
160.83  
154.37  
149.98  
148.19  
141.75  
134.65  
130.78  
129.26  
126.99  
125.62  
125.33  
122.12  
120.74  
119.19  
118.91  
116.62  
111.71  
56.16  
52.73  
35.45

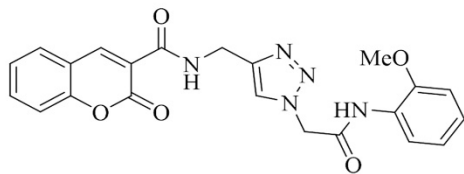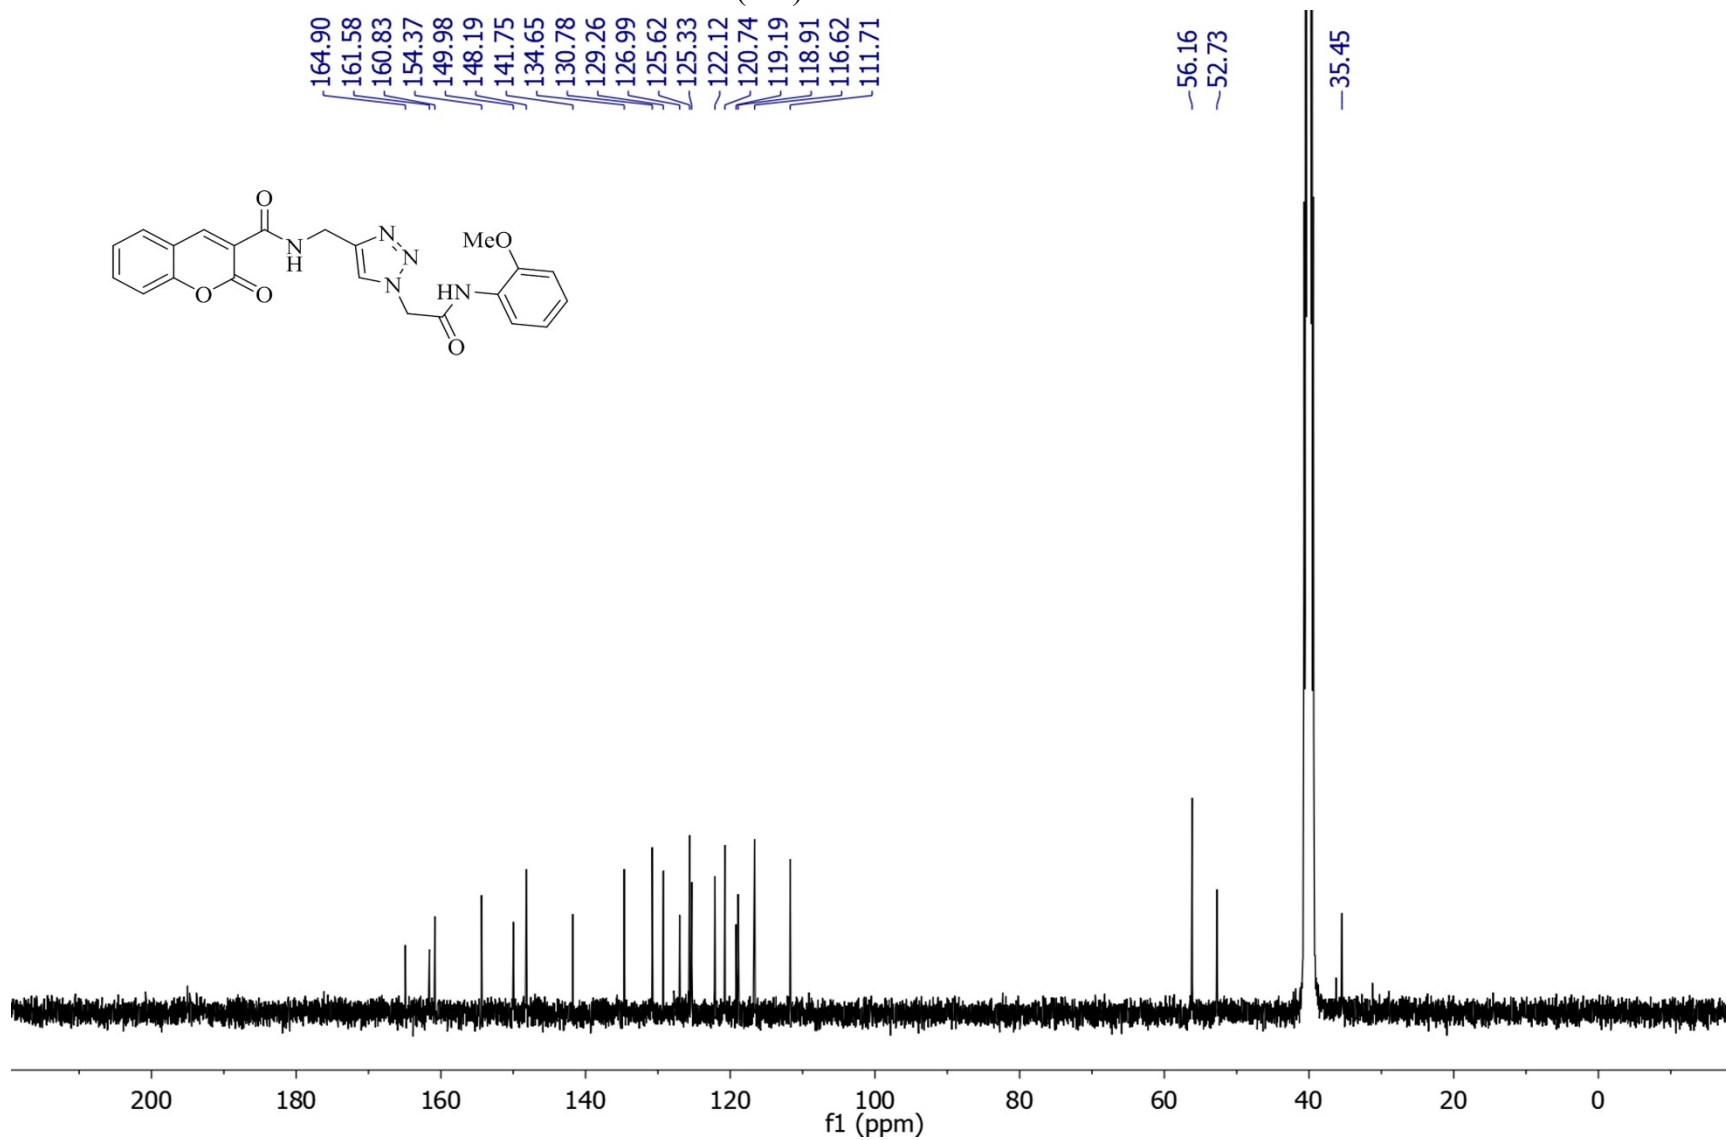

<sup>1</sup>H NMR spectrum of N-((1-(2-((3-methoxyphenyl)amino)-2-oxoethyl)-1H-1,2,3-triazol-4-yl)methyl)-2-oxo-2H-chromene-3-carboxamide (**12f**)

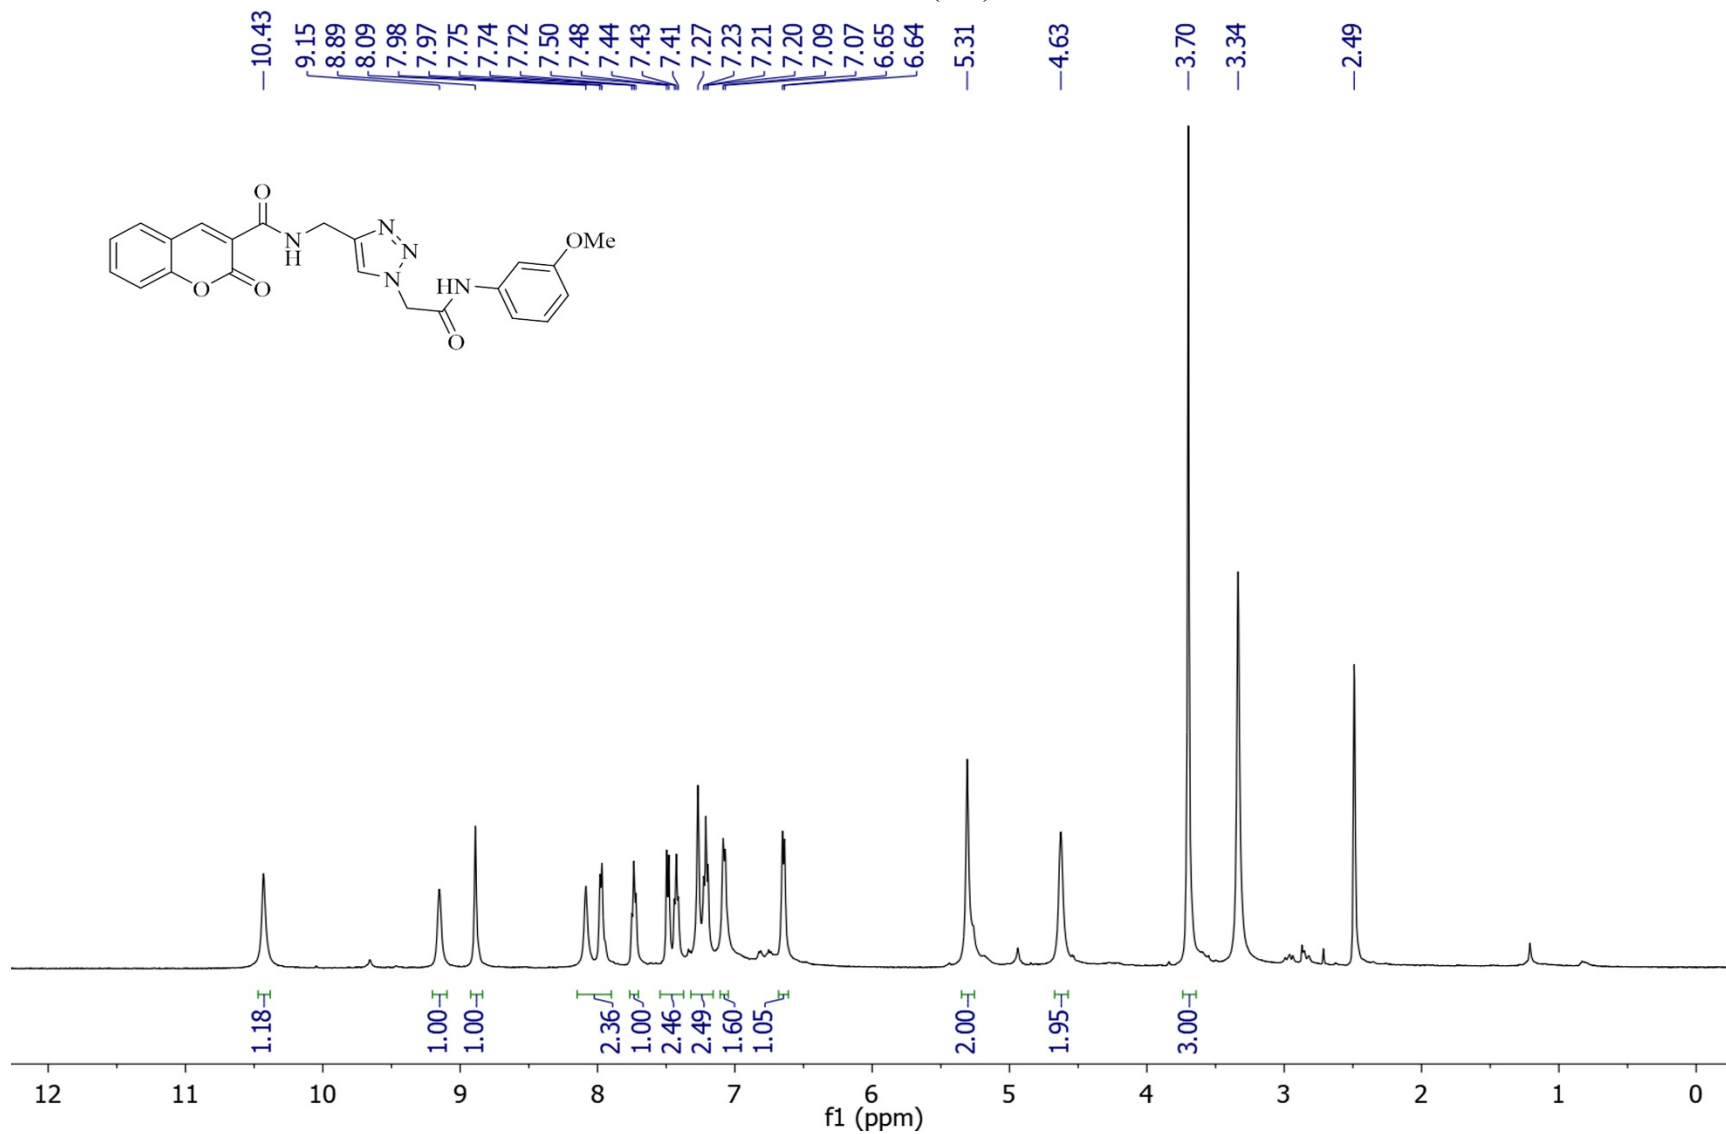

<sup>13</sup>C NMR spectrum of N-((1-(2-((3-methoxyphenyl)amino)-2-oxoethyl)-1H-1,2,3-triazol-4-yl)methyl)-2-oxo-2H-chromene-3-carboxamide (**12f**)

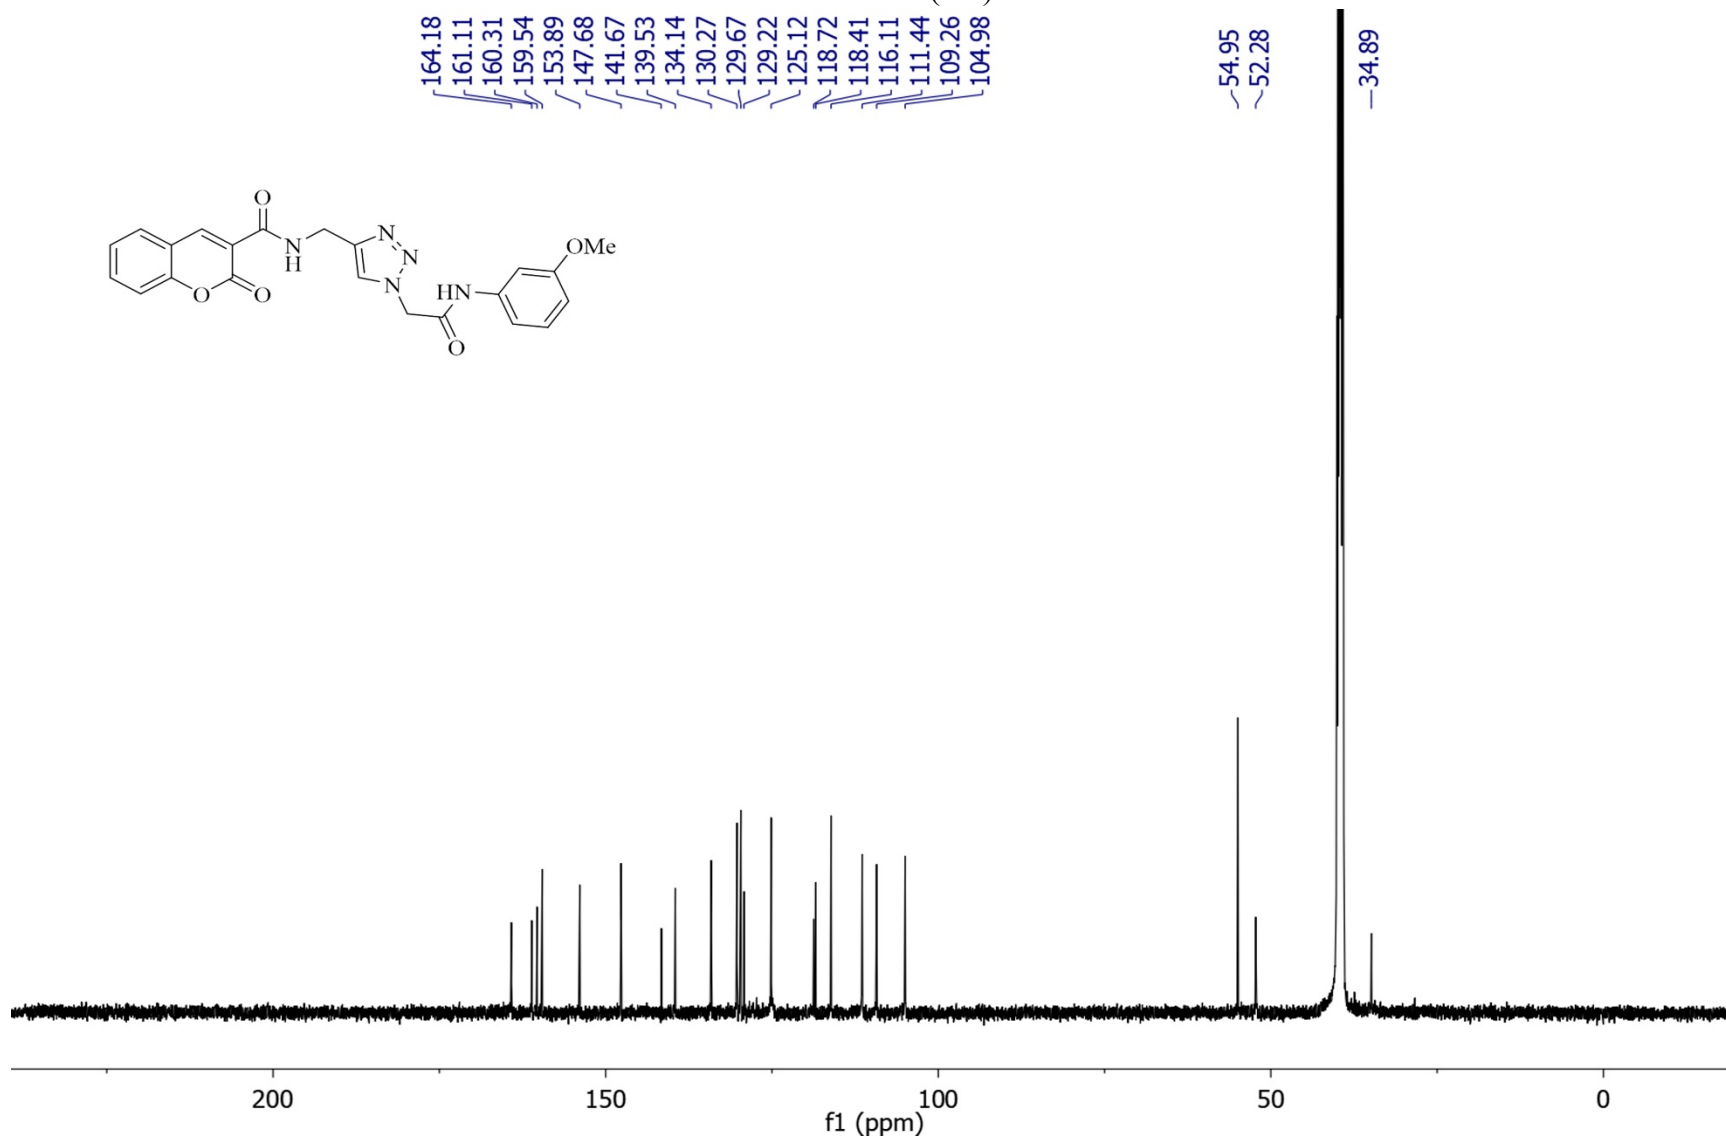

$^1\text{H}$  NMR spectrum of N-((1-(2-((4-methoxyphenyl)amino)-2-oxoethyl)-1H-1,2,3-triazol-4-yl)methyl)-2-oxo-2H-chromene-3-carboxamide (**12g**)

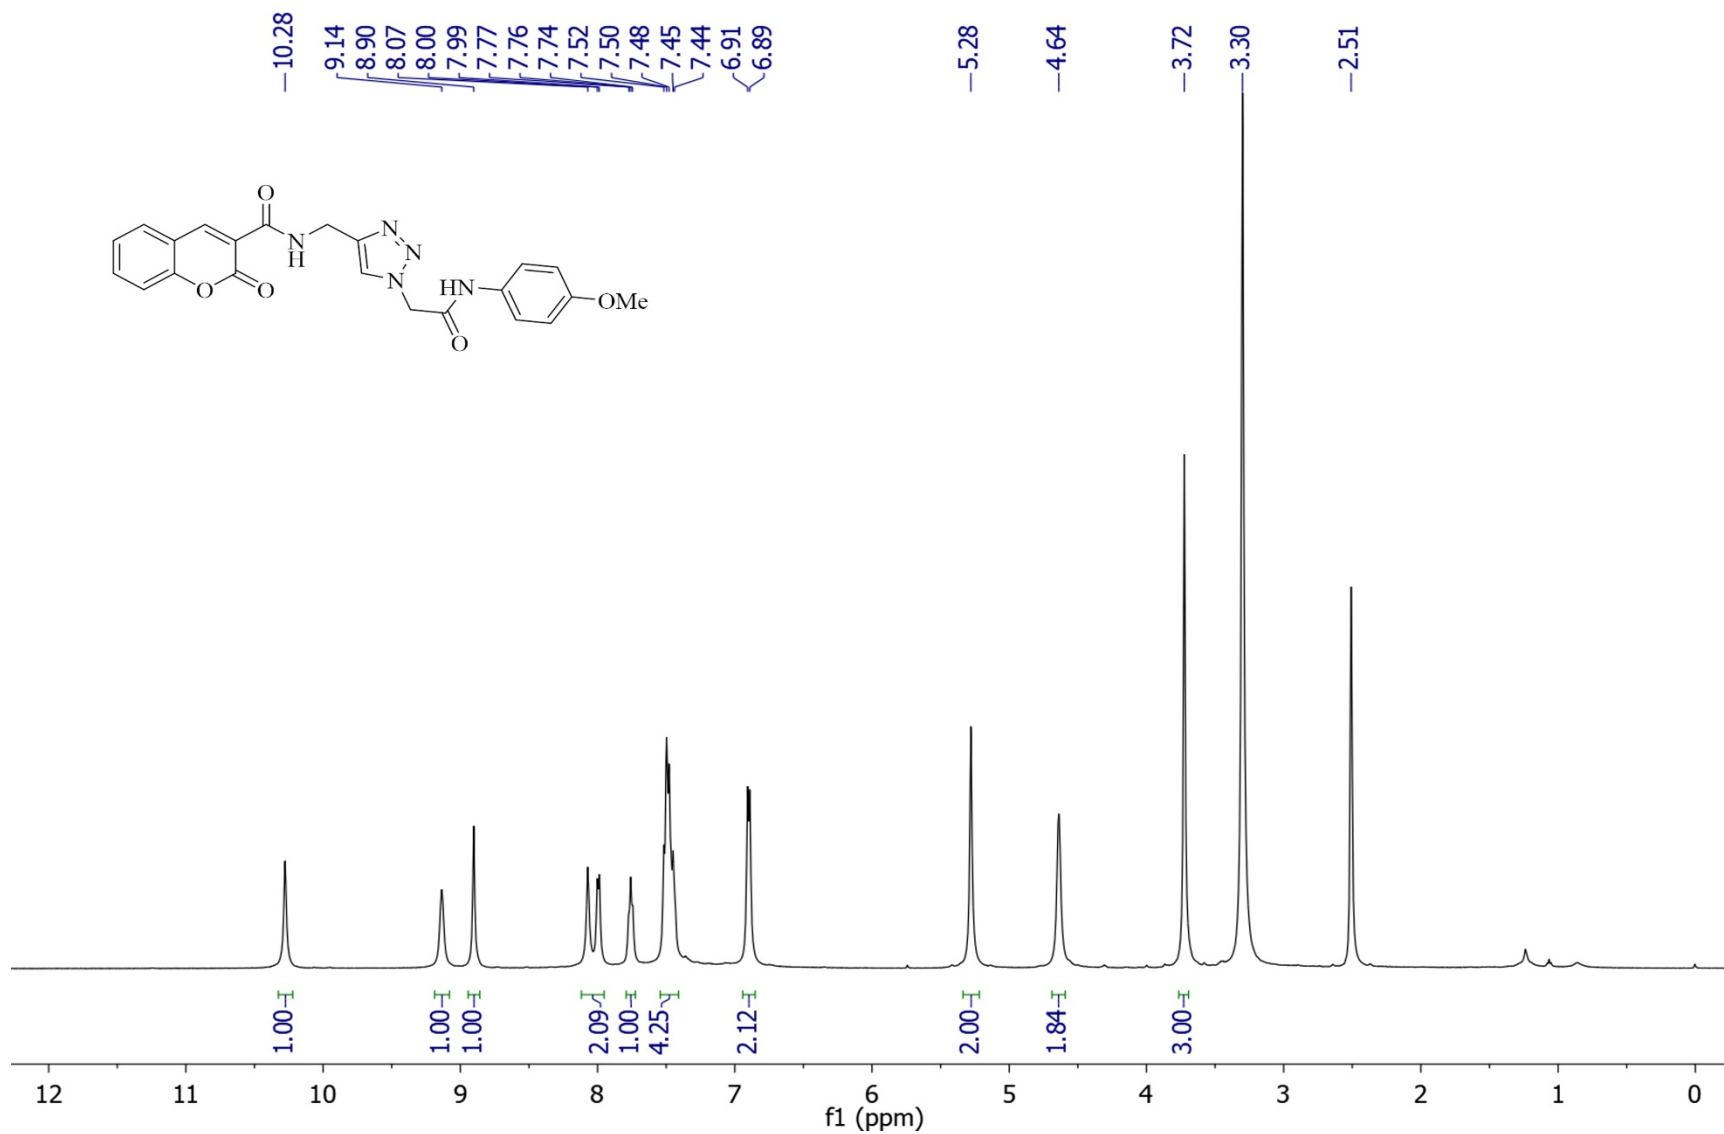

<sup>13</sup>C NMR spectrum of N-((1-(2-((4-methoxyphenyl)amino)-2-oxoethyl)-1H-1,2,3-triazol-4-yl)methyl)-2-oxo-2H-chromene-3-

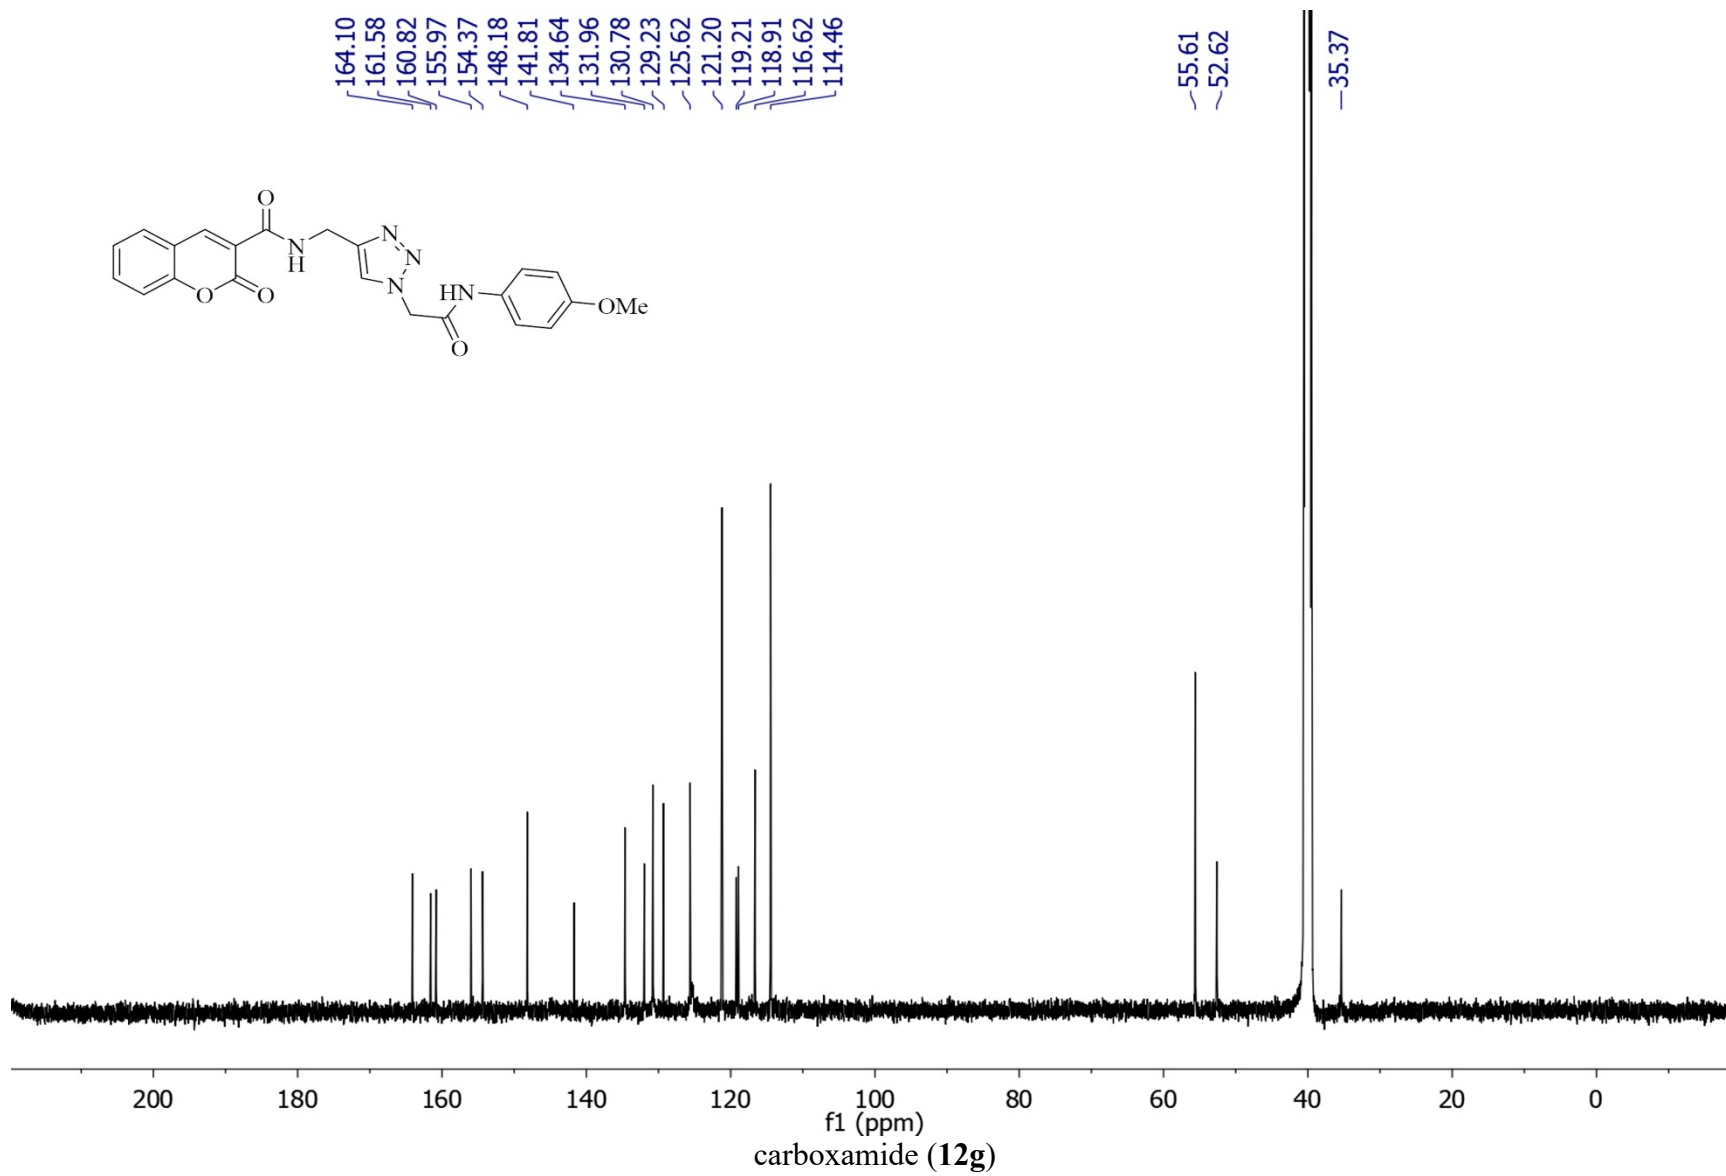



<sup>1</sup>H NMR spectrum of 2-oxo-N-((1-(2-oxo-2-((3,4,5-trimethoxyphenyl)amino)ethyl)-1H-1,2,3-triazol-4-yl)methyl)-2H-chromene-3-

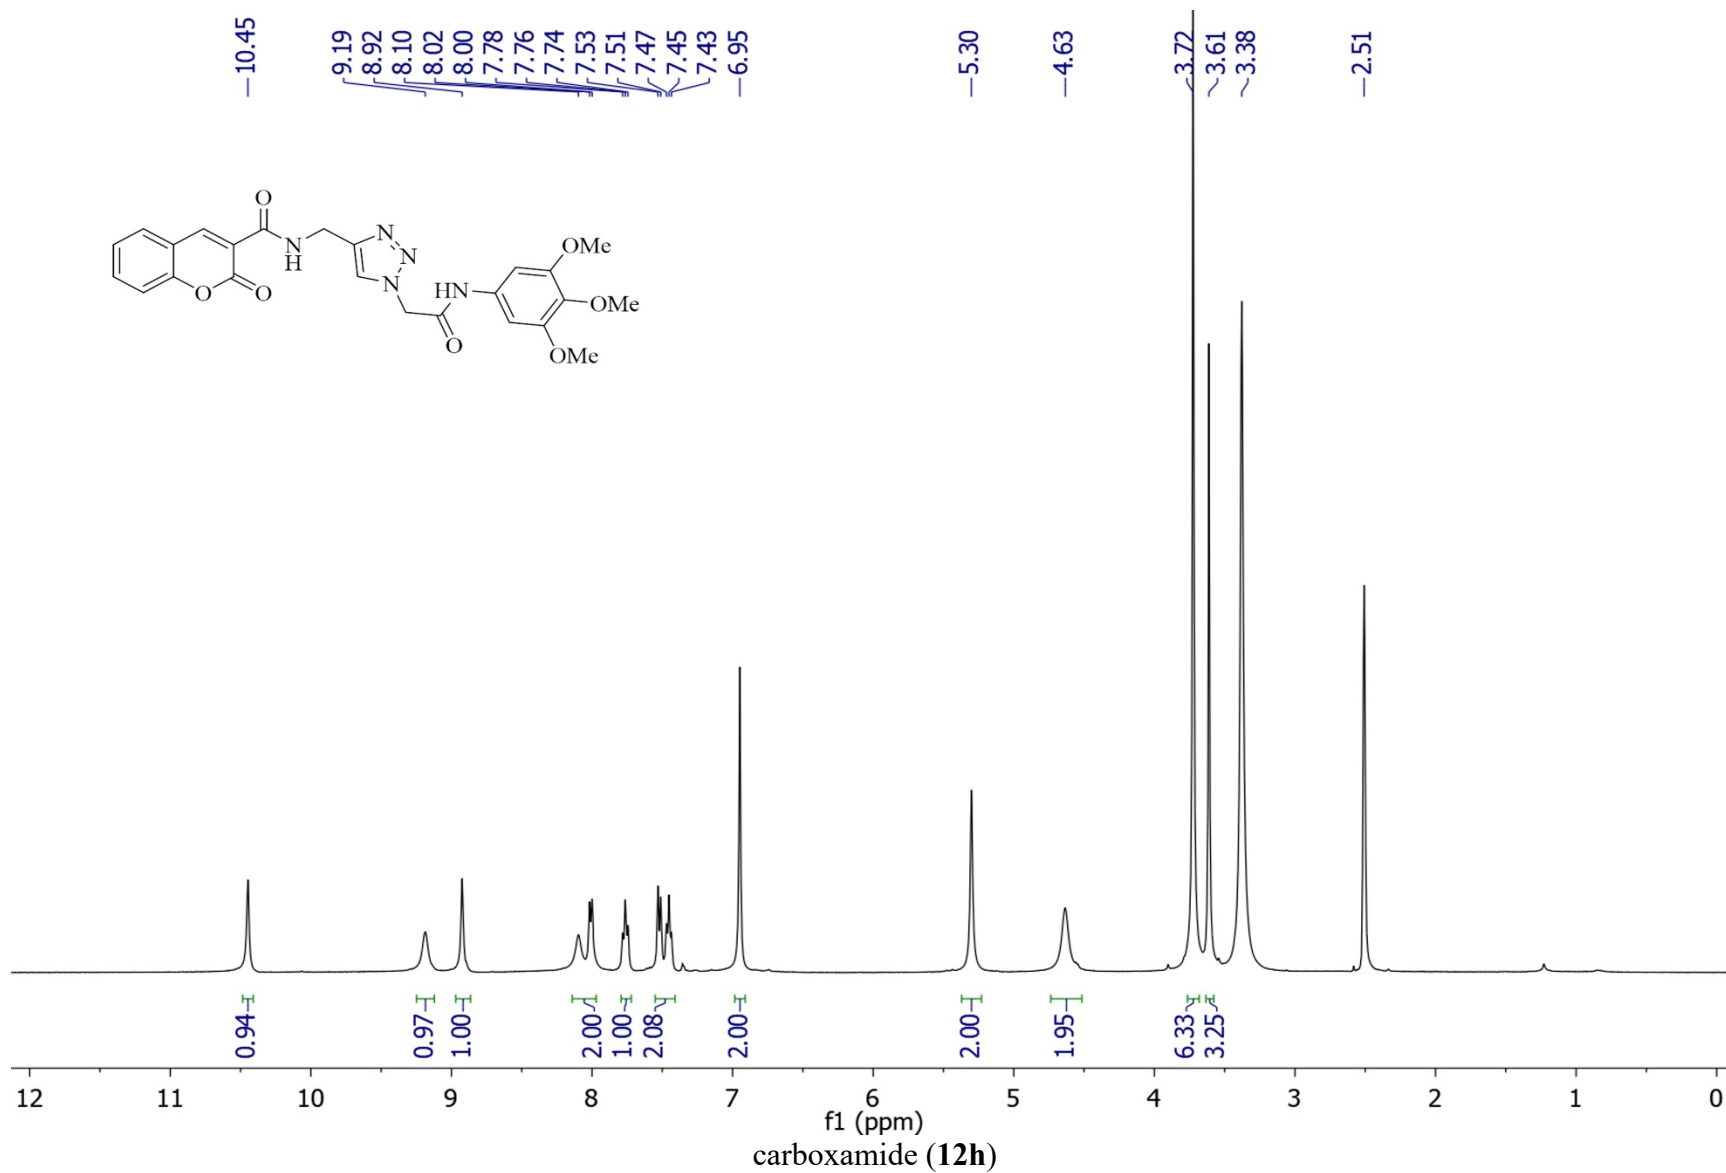

<sup>13</sup>C NMR spectrum of 2-oxo-N-((1-(2-oxo-2-((3,4,5-trimethoxyphenyl)amino)ethyl)-1H-1,2,3-triazol-4-yl)methyl)-2H-chromene-3-carboxamide (**12h**)

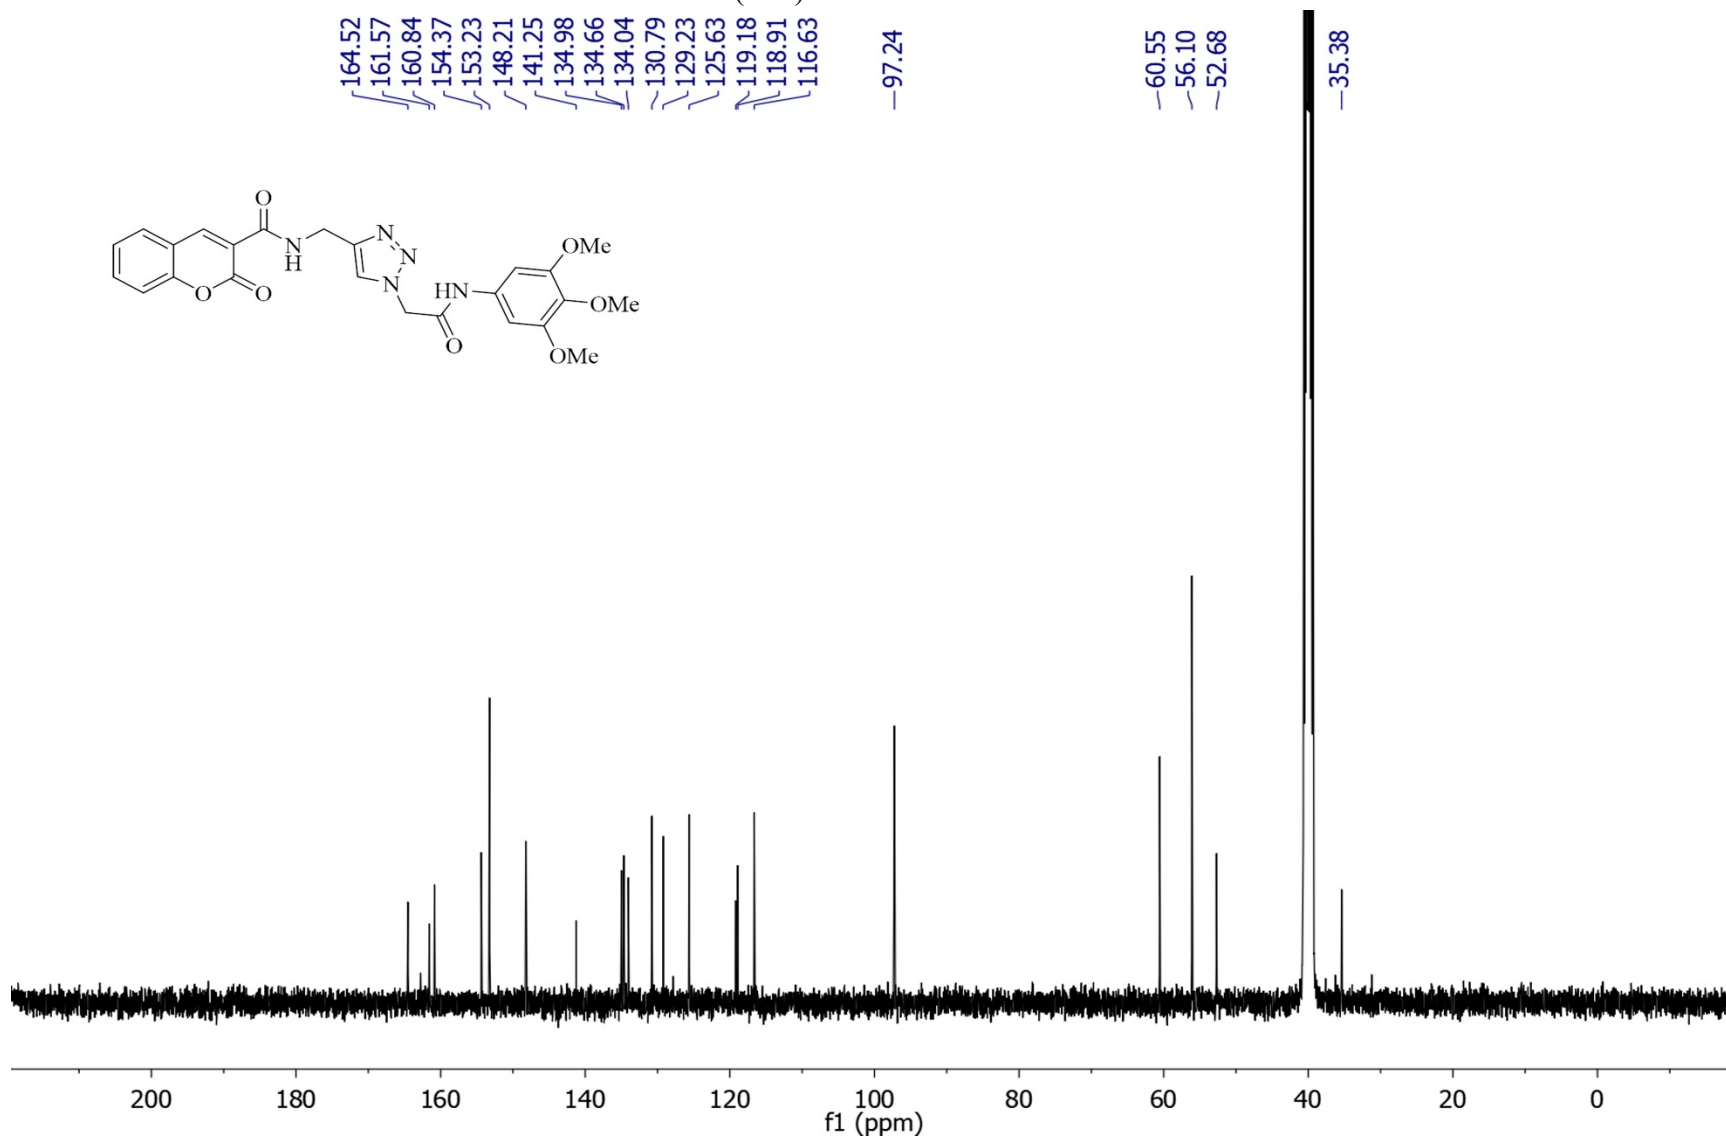

<sup>1</sup>H NMR spectrum of N-((1-(2-((2-fluorophenyl)amino)-2-oxoethyl)-1H-1,2,3-triazol-4-yl)methyl)-2-oxo-2H-chromene-3-carboxamide (**12i**)

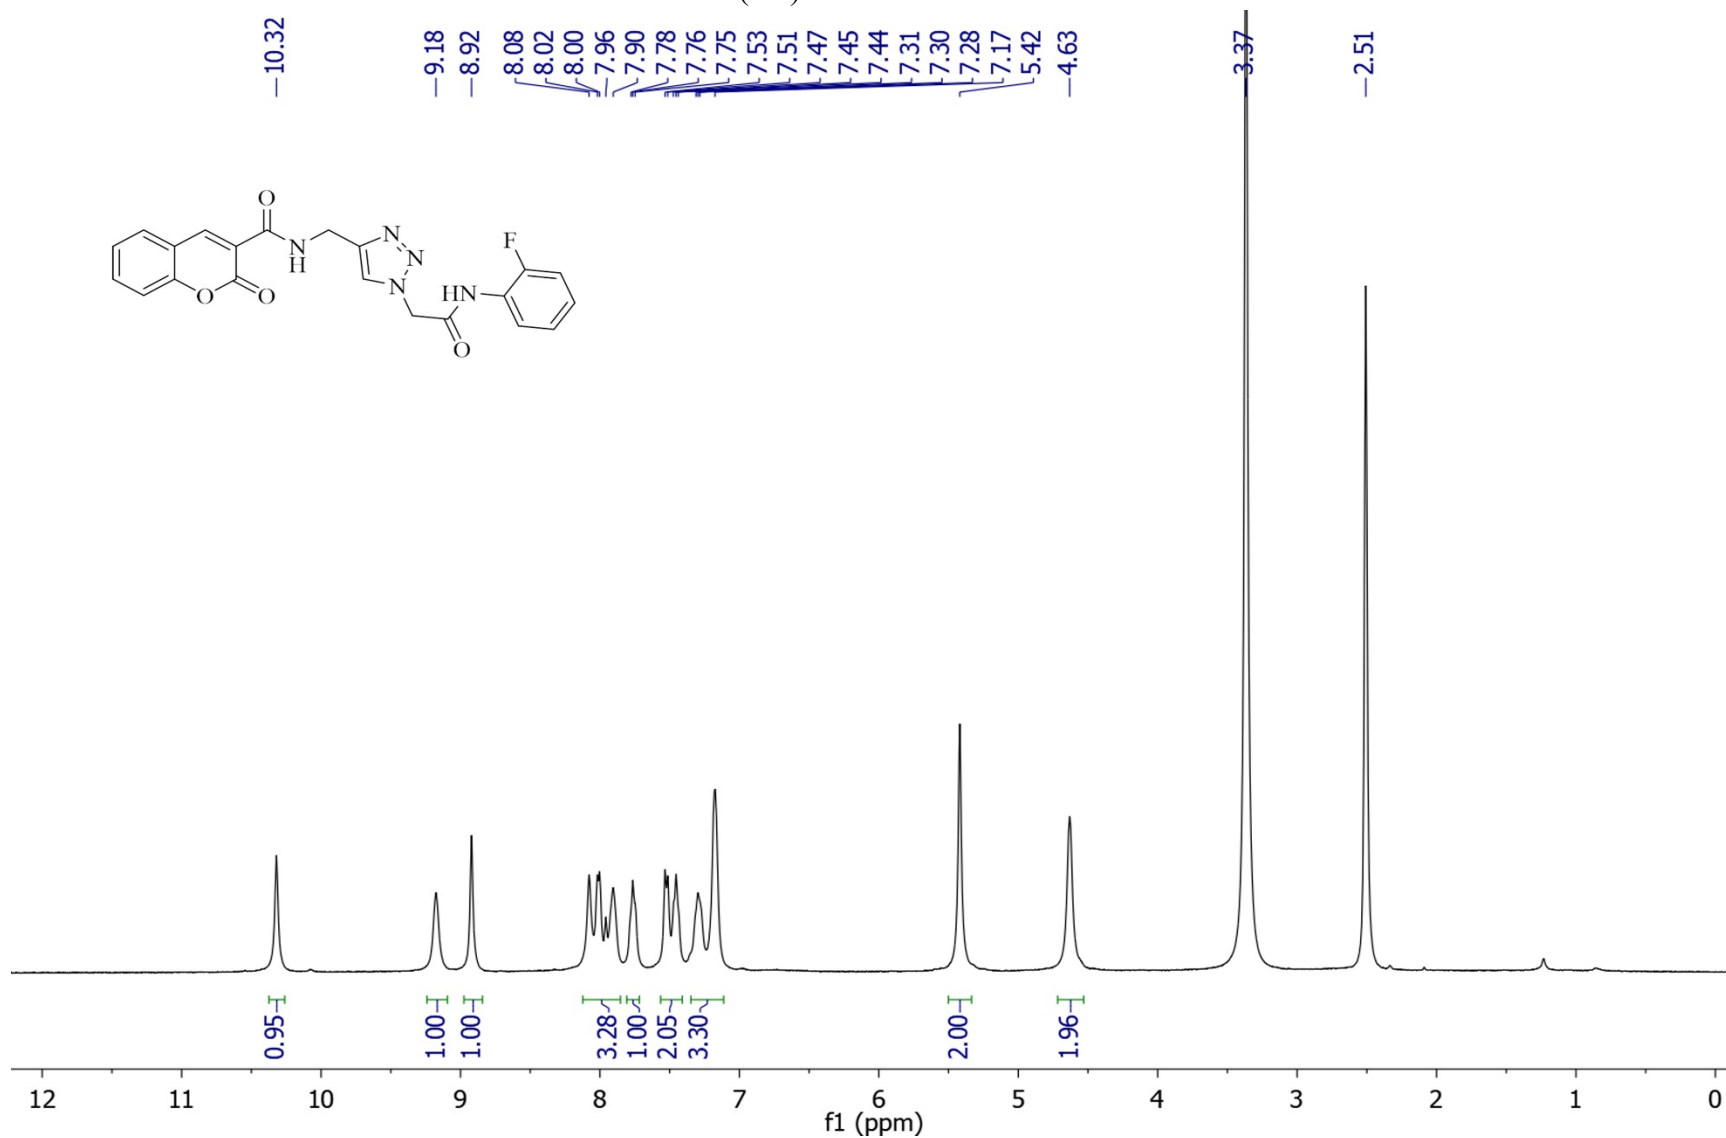

$^{13}\text{C}$  NMR spectrum of N-((1-(2-((2-fluorophenyl)amino)-2-oxoethyl)-1H-1,2,3-triazol-4-yl)methyl)-2-oxo-2H-chromene-3-carboxamide (**12i**)

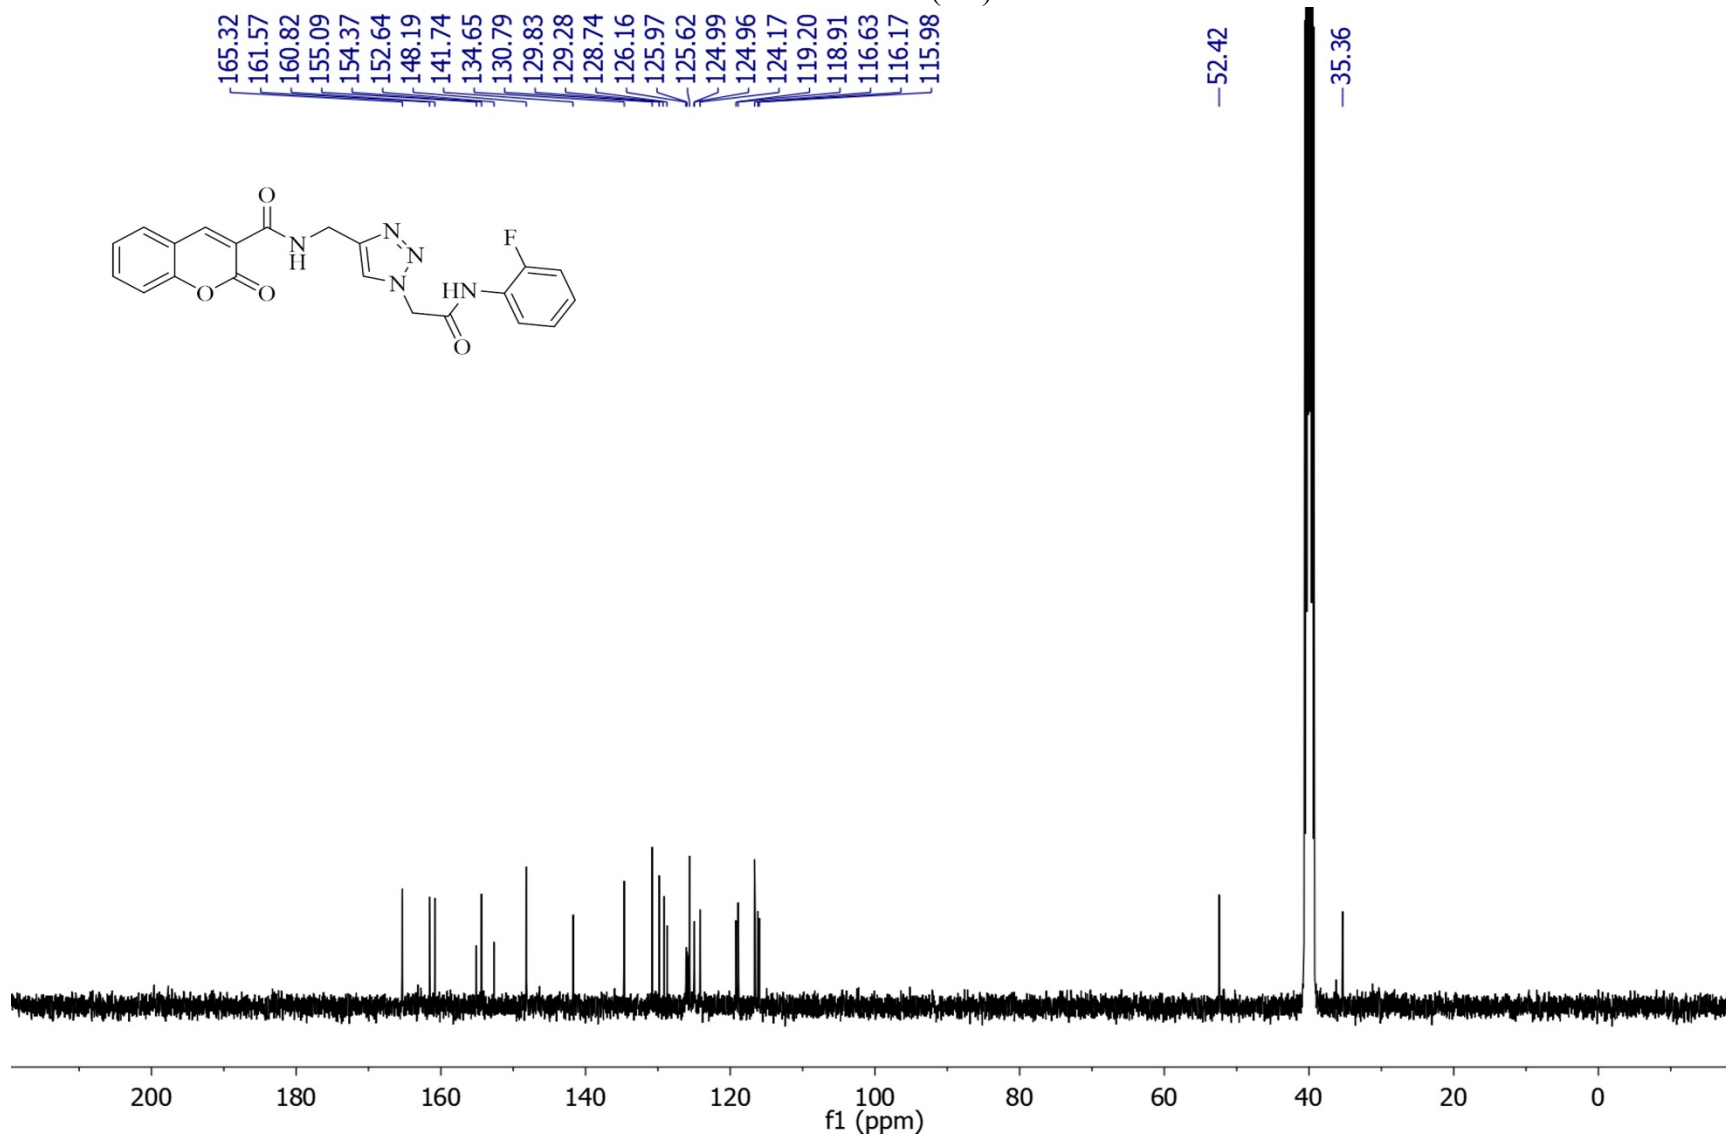

<sup>1</sup>H NMR spectrum of N-((1-(2-((4-fluorophenyl)amino)-2-oxoethyl)-1H-1,2,3-triazol-4-yl)methyl)-2-oxo-2H-chromene-3-

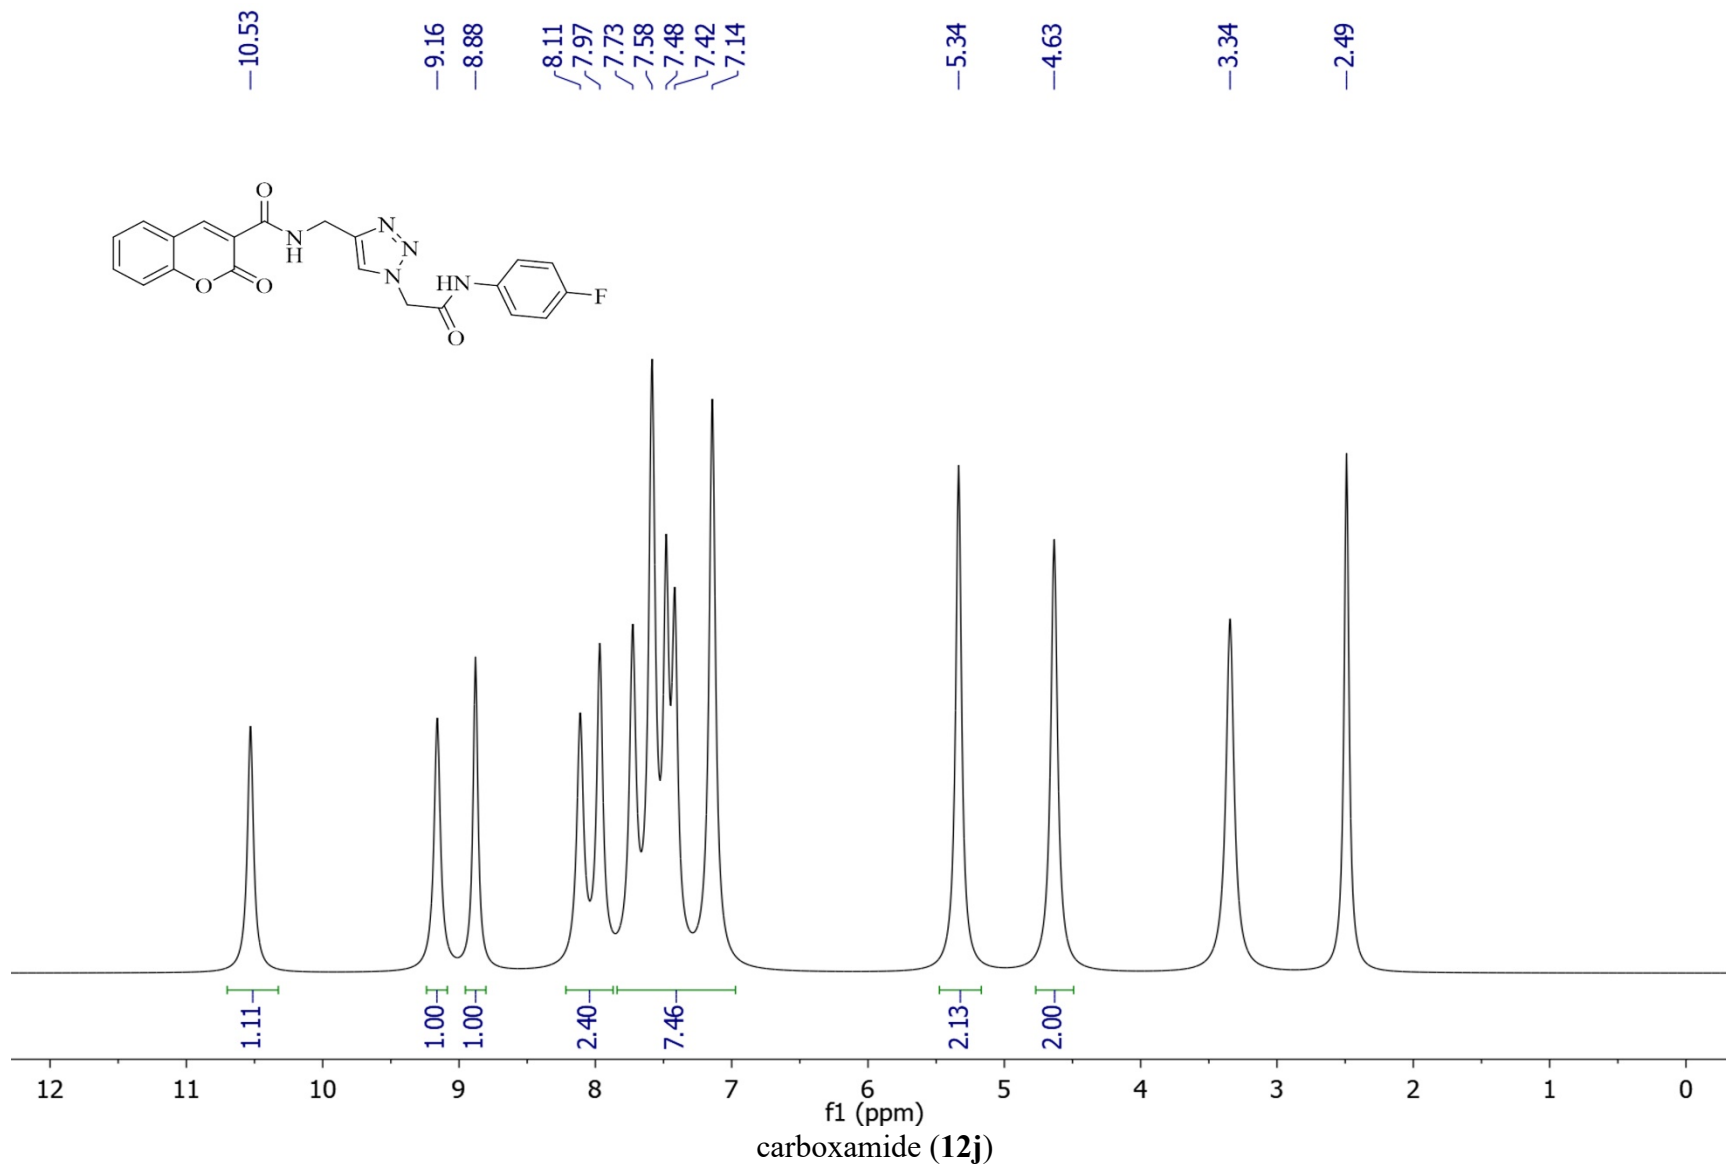



<sup>13</sup>C NMR spectrum of N-((1-(2-((4-fluorophenyl)amino)-2-oxoethyl)-1H-1,2,3-triazol-4-yl)methyl)-2-oxo-2H-chromene-3-

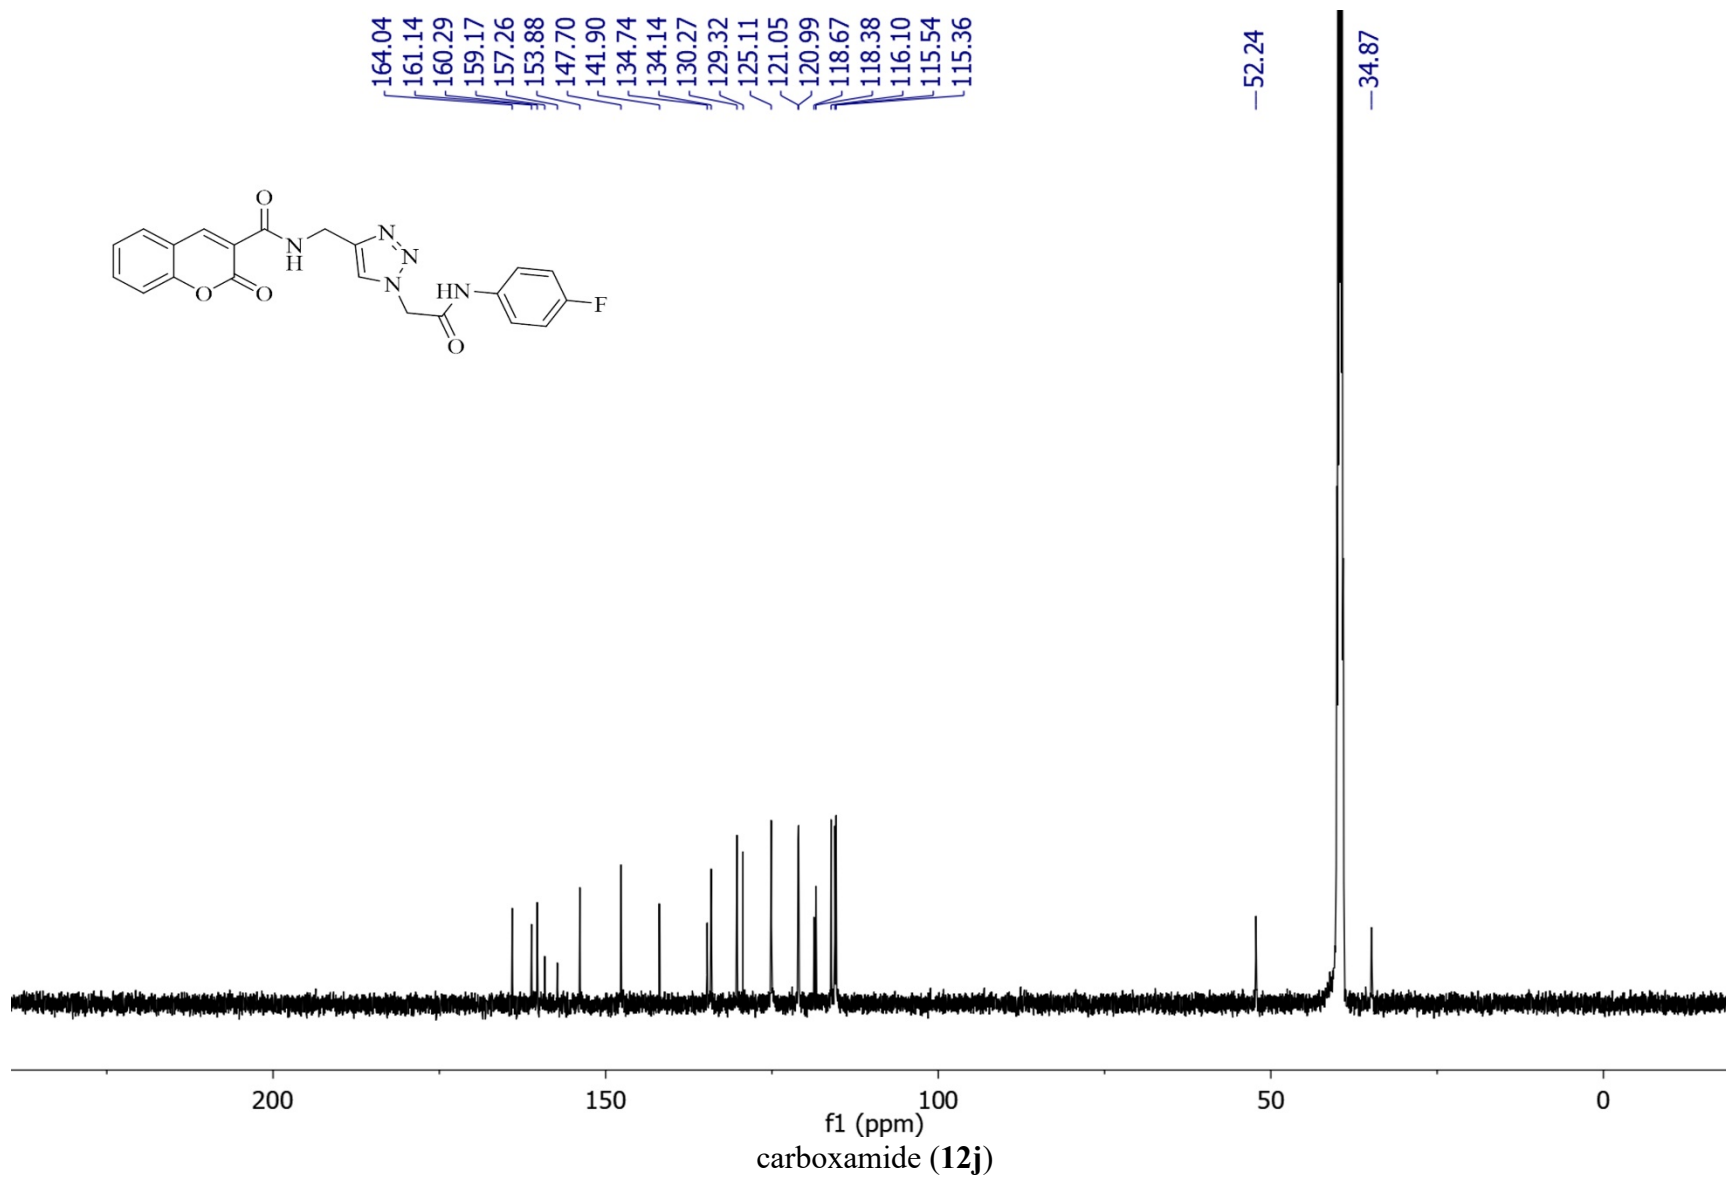



<sup>1</sup>H NMR spectrum of N-((1-(2-((2-chlorophenyl)amino)-2-oxoethyl)-1H-1,2,3-triazol-4-yl)methyl)-2-oxo-2H-chromene-3-

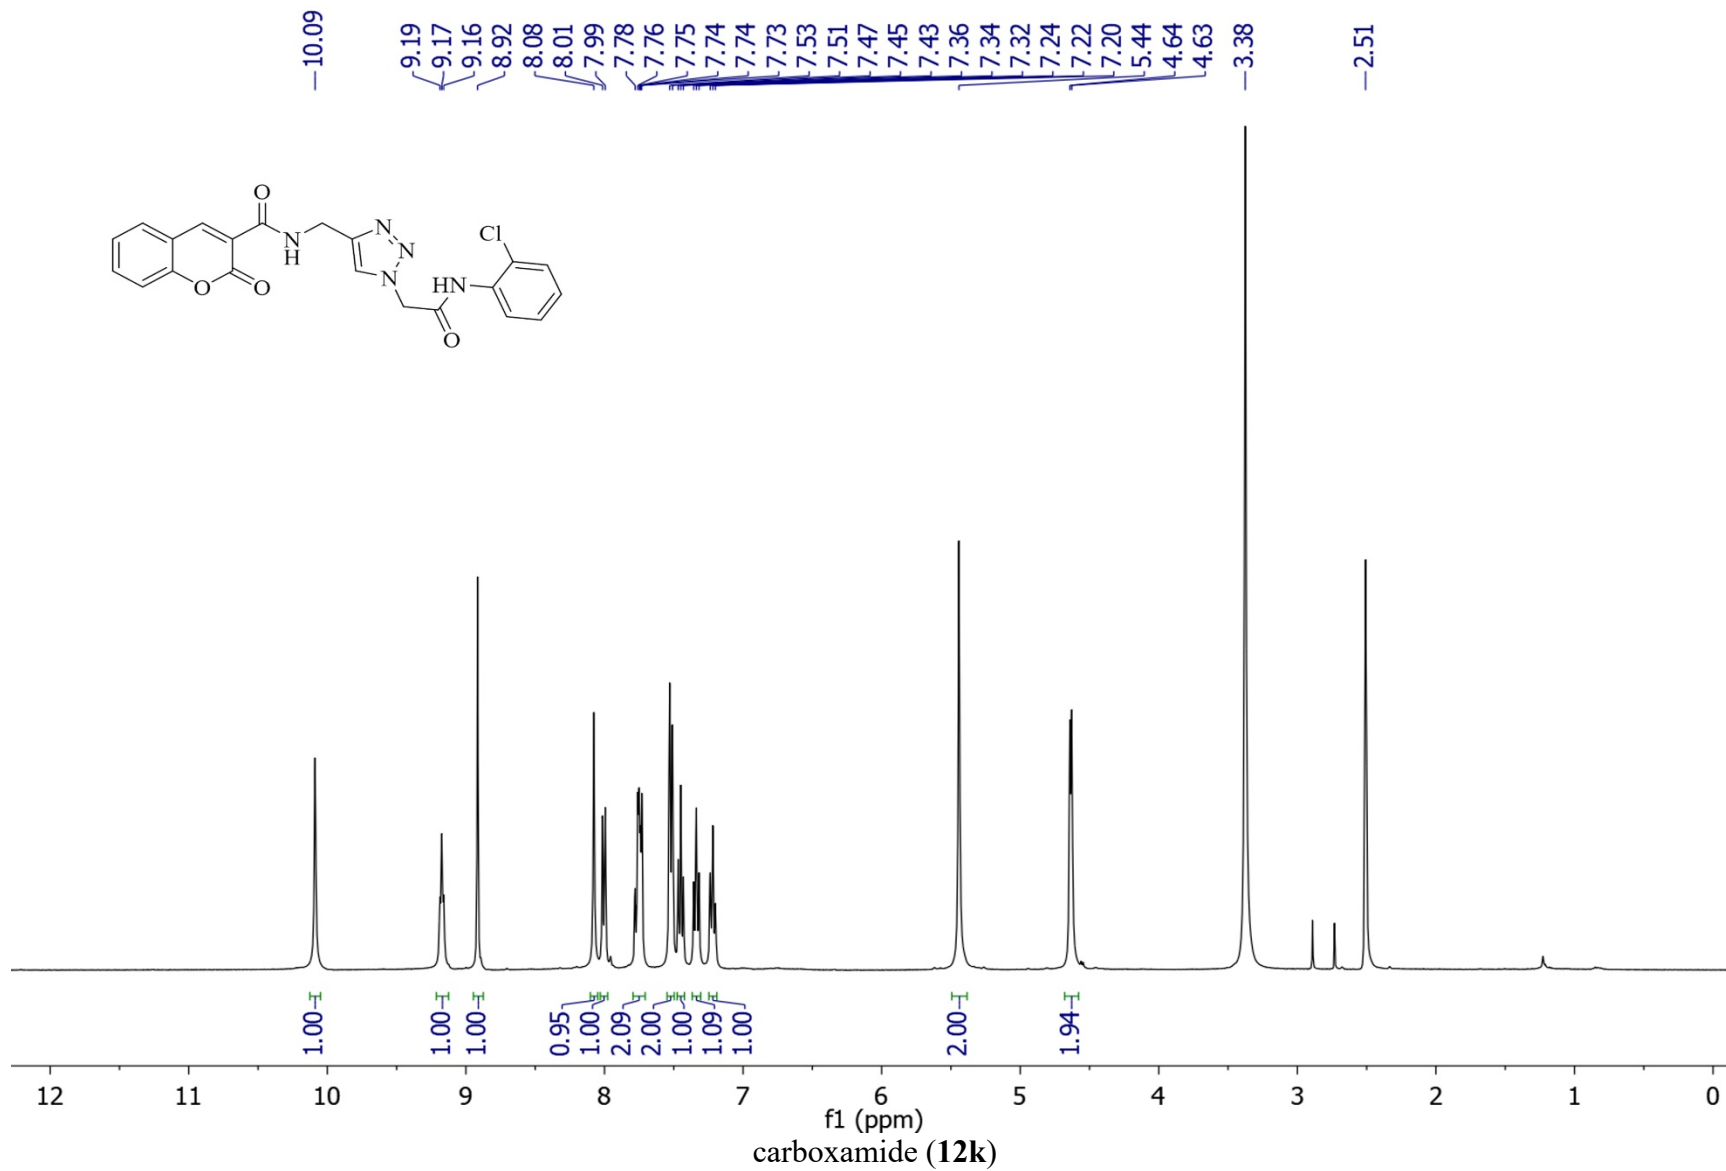



<sup>13</sup>C NMR spectrum of N-((1-(2-((2-chlorophenyl)amino)-2-oxoethyl)-1H-1,2,3-triazol-4-yl)methyl)-2-oxo-2H-chromene-3-

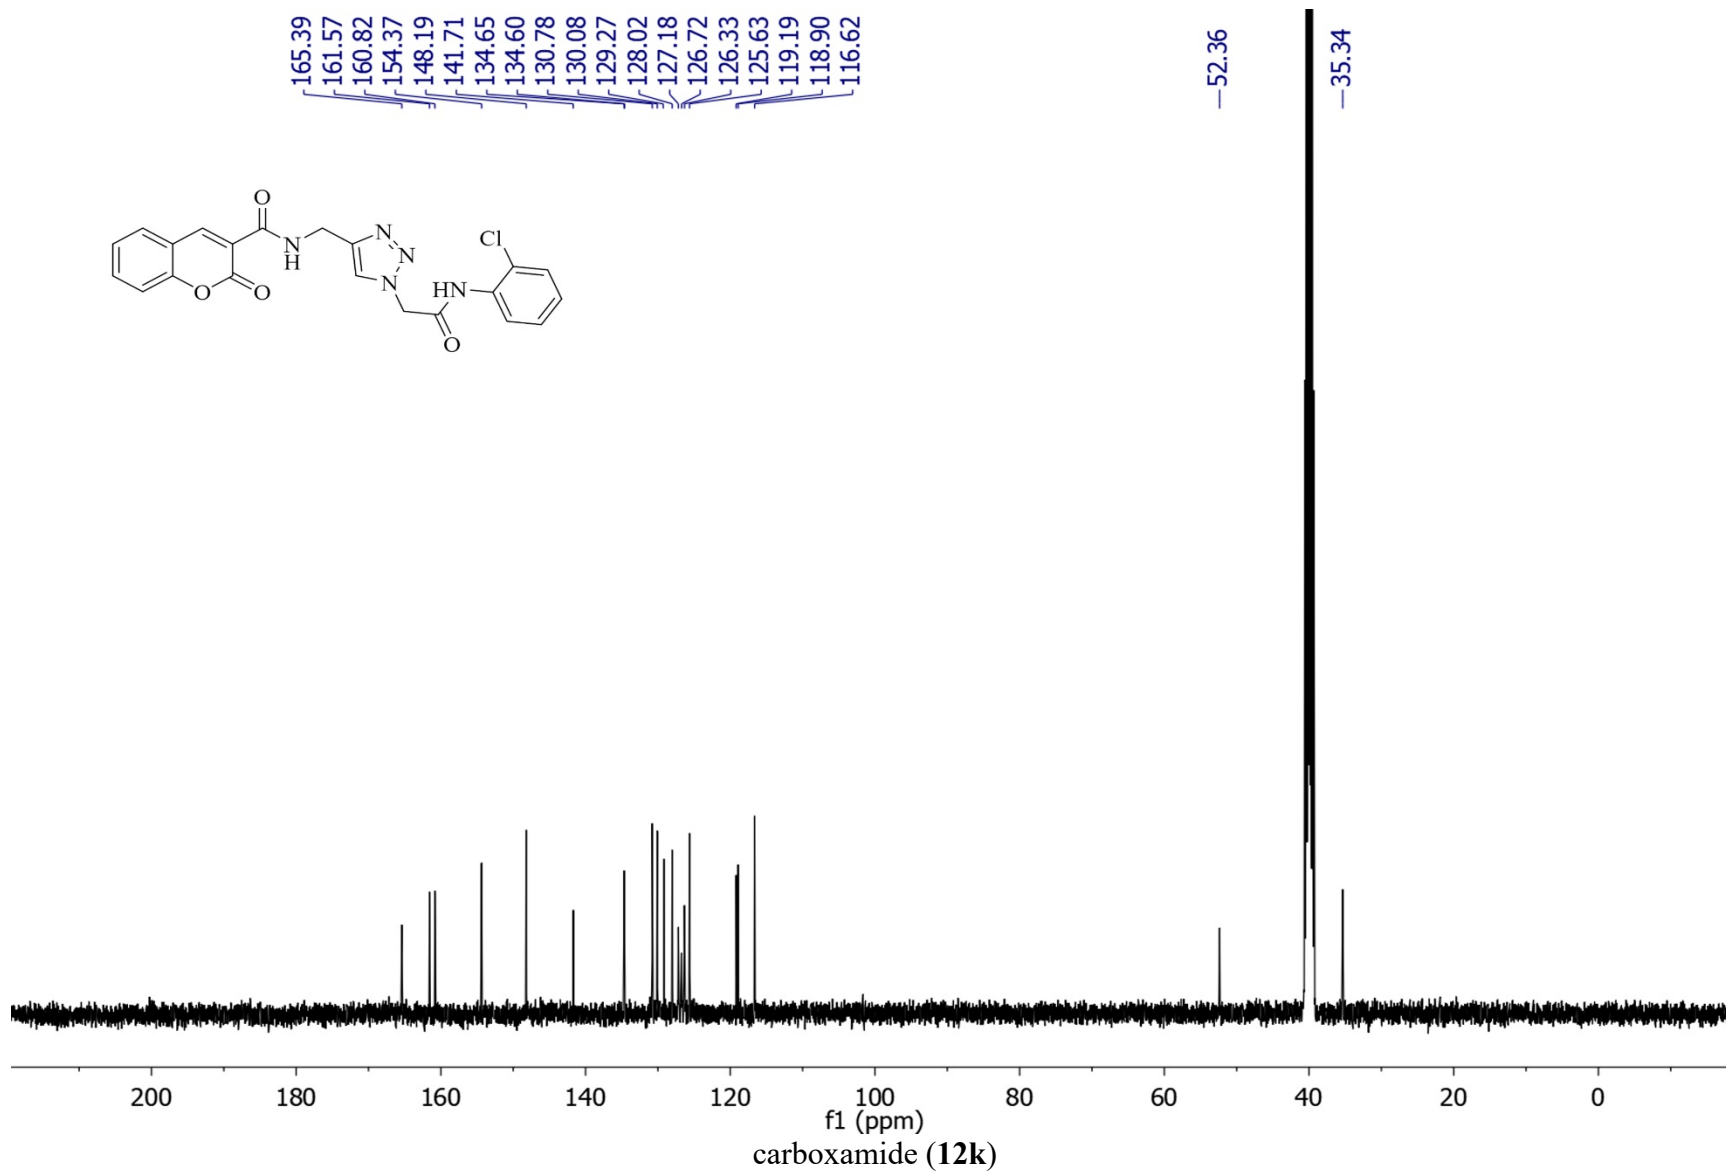

<sup>1</sup>H NMR spectrum of N-((1-(2-((3-chlorophenyl)amino)-2-oxoethyl)-1H-1,2,3-triazol-4-yl)methyl)-2-oxo-2H-chromene-3-carboxamide (**12l**)

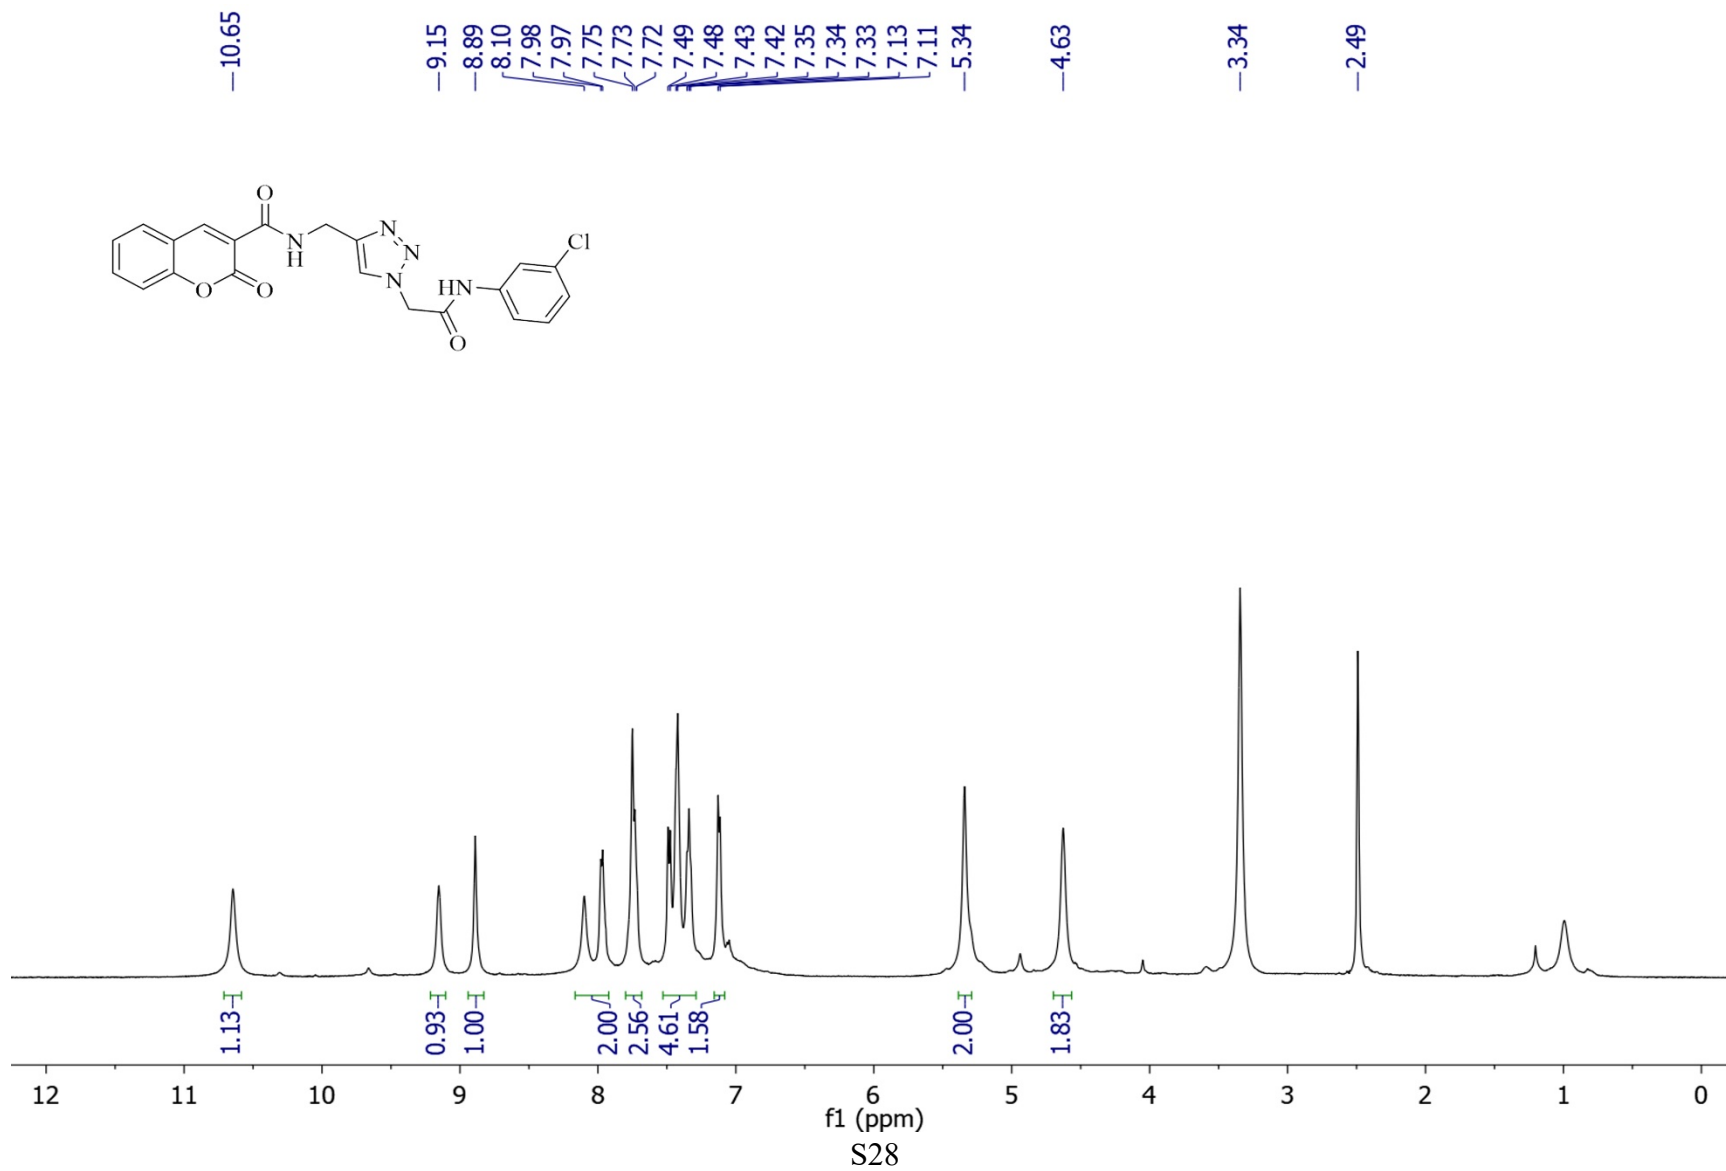



<sup>13</sup>C NMR spectrum of N-((1-(2-((3-chlorophenyl)amino)-2-oxoethyl)-1H-1,2,3-triazol-4-yl)methyl)-2-oxo-2H-chromene-3-carboxamide (**12I**)

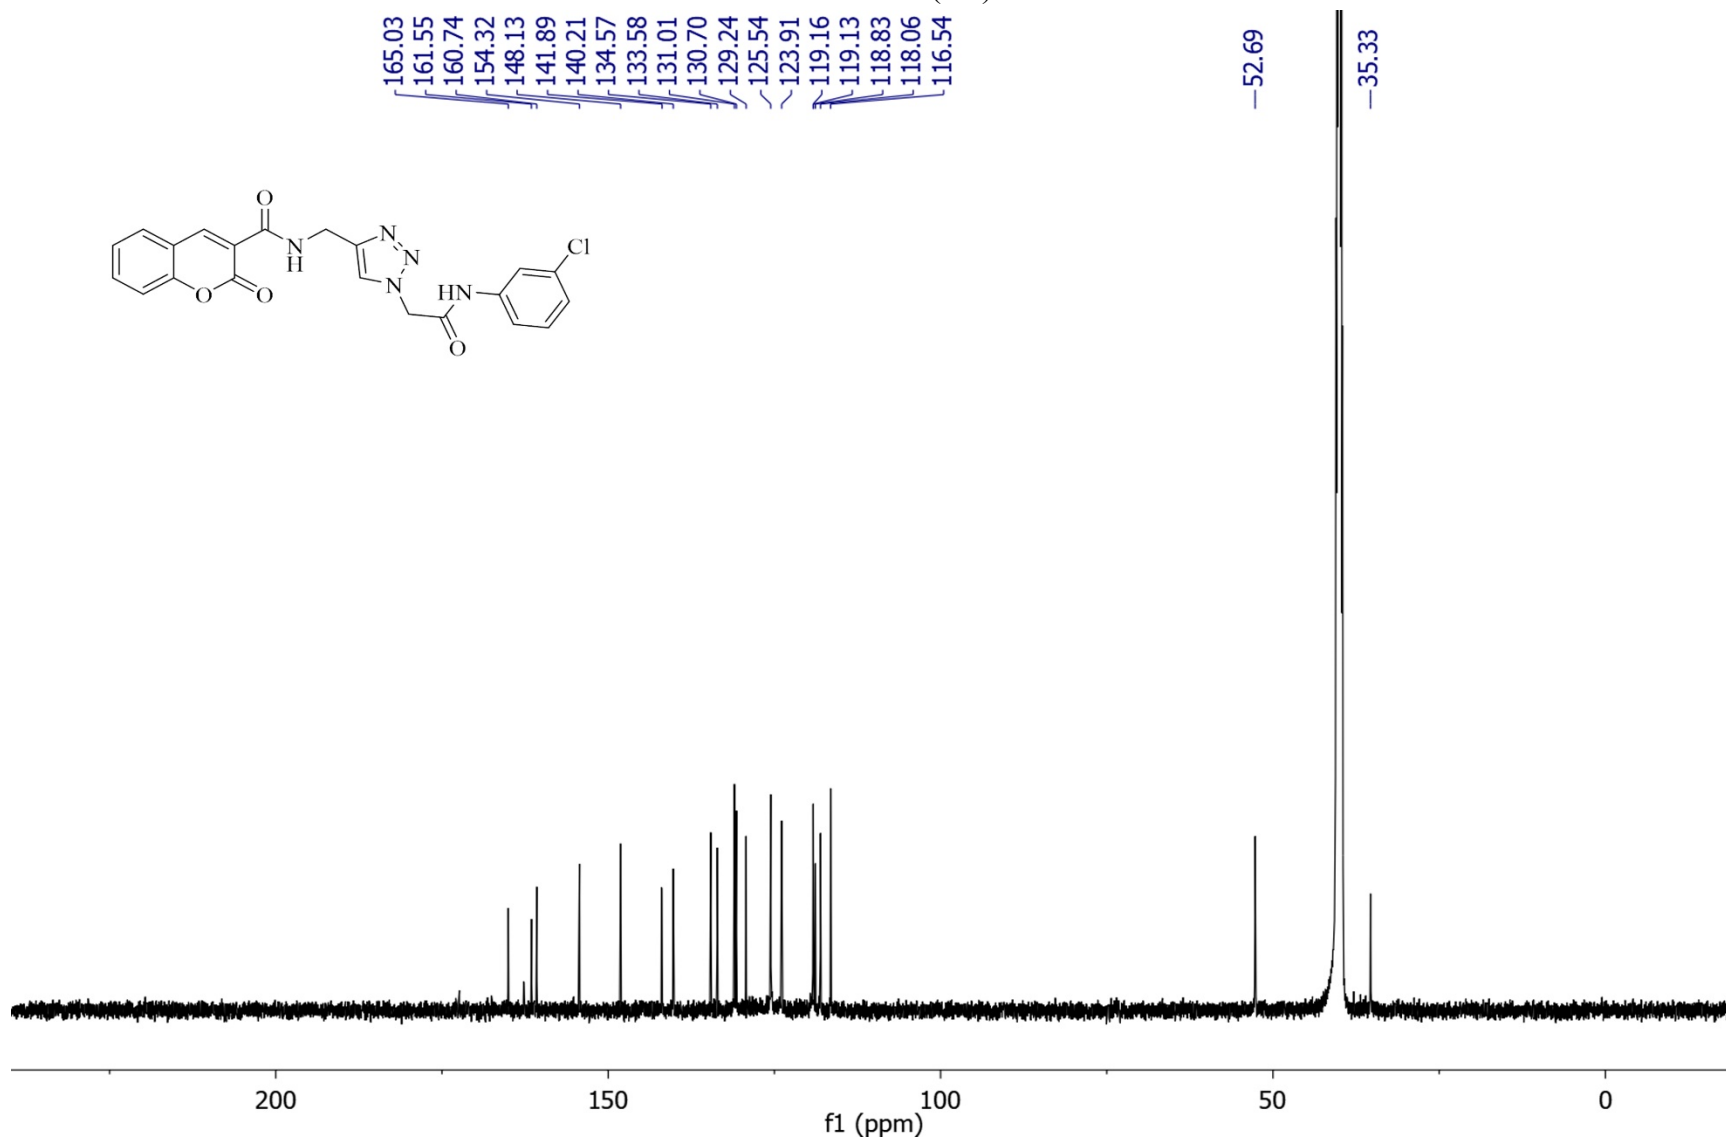

<sup>1</sup>H NMR spectrum of N-((1-(2-((4-chlorophenyl)amino)-2-oxoethyl)-1H-1,2,3-triazol-4-yl)methyl)-2-oxo-2H-chromene-3-

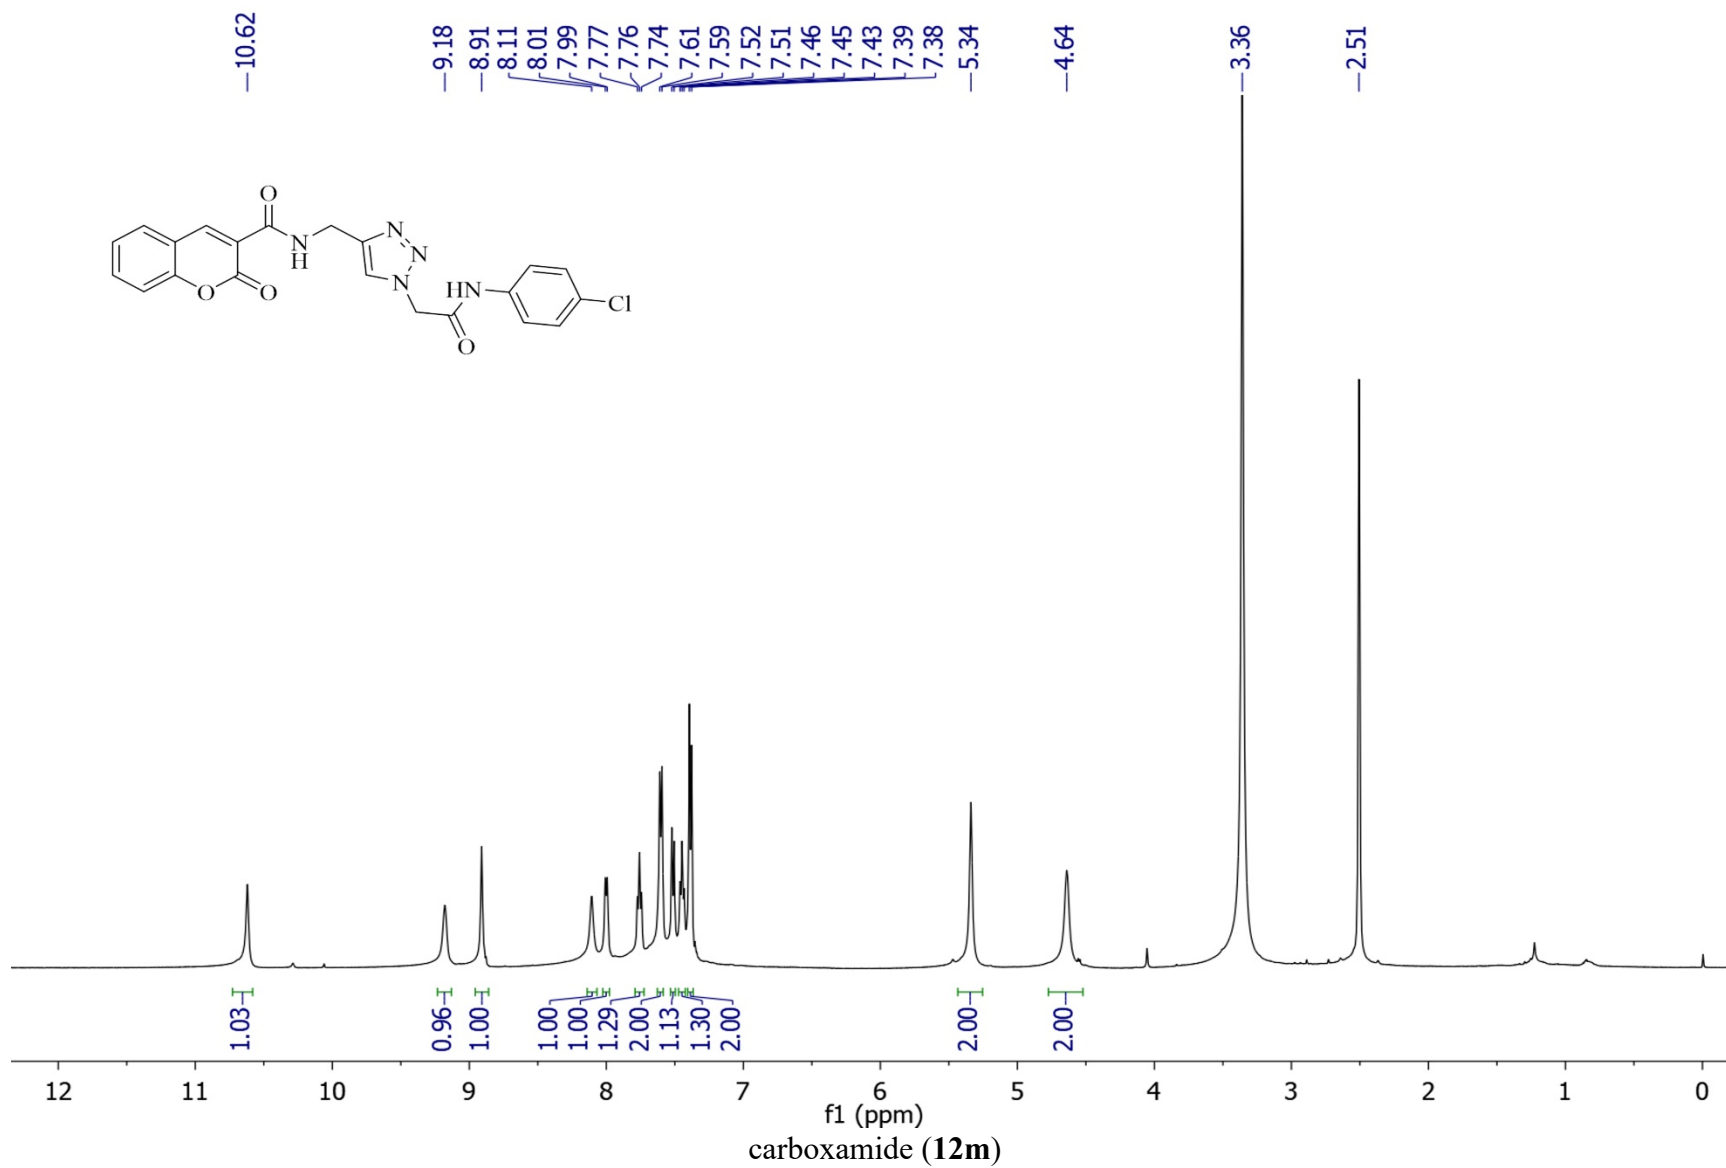



<sup>13</sup>C NMR spectrum of N-((1-(2-((4-chlorophenyl)amino)-2-oxoethyl)-1H-1,2,3-triazol-4-yl)methyl)-2-oxo-2H-chromene-3-

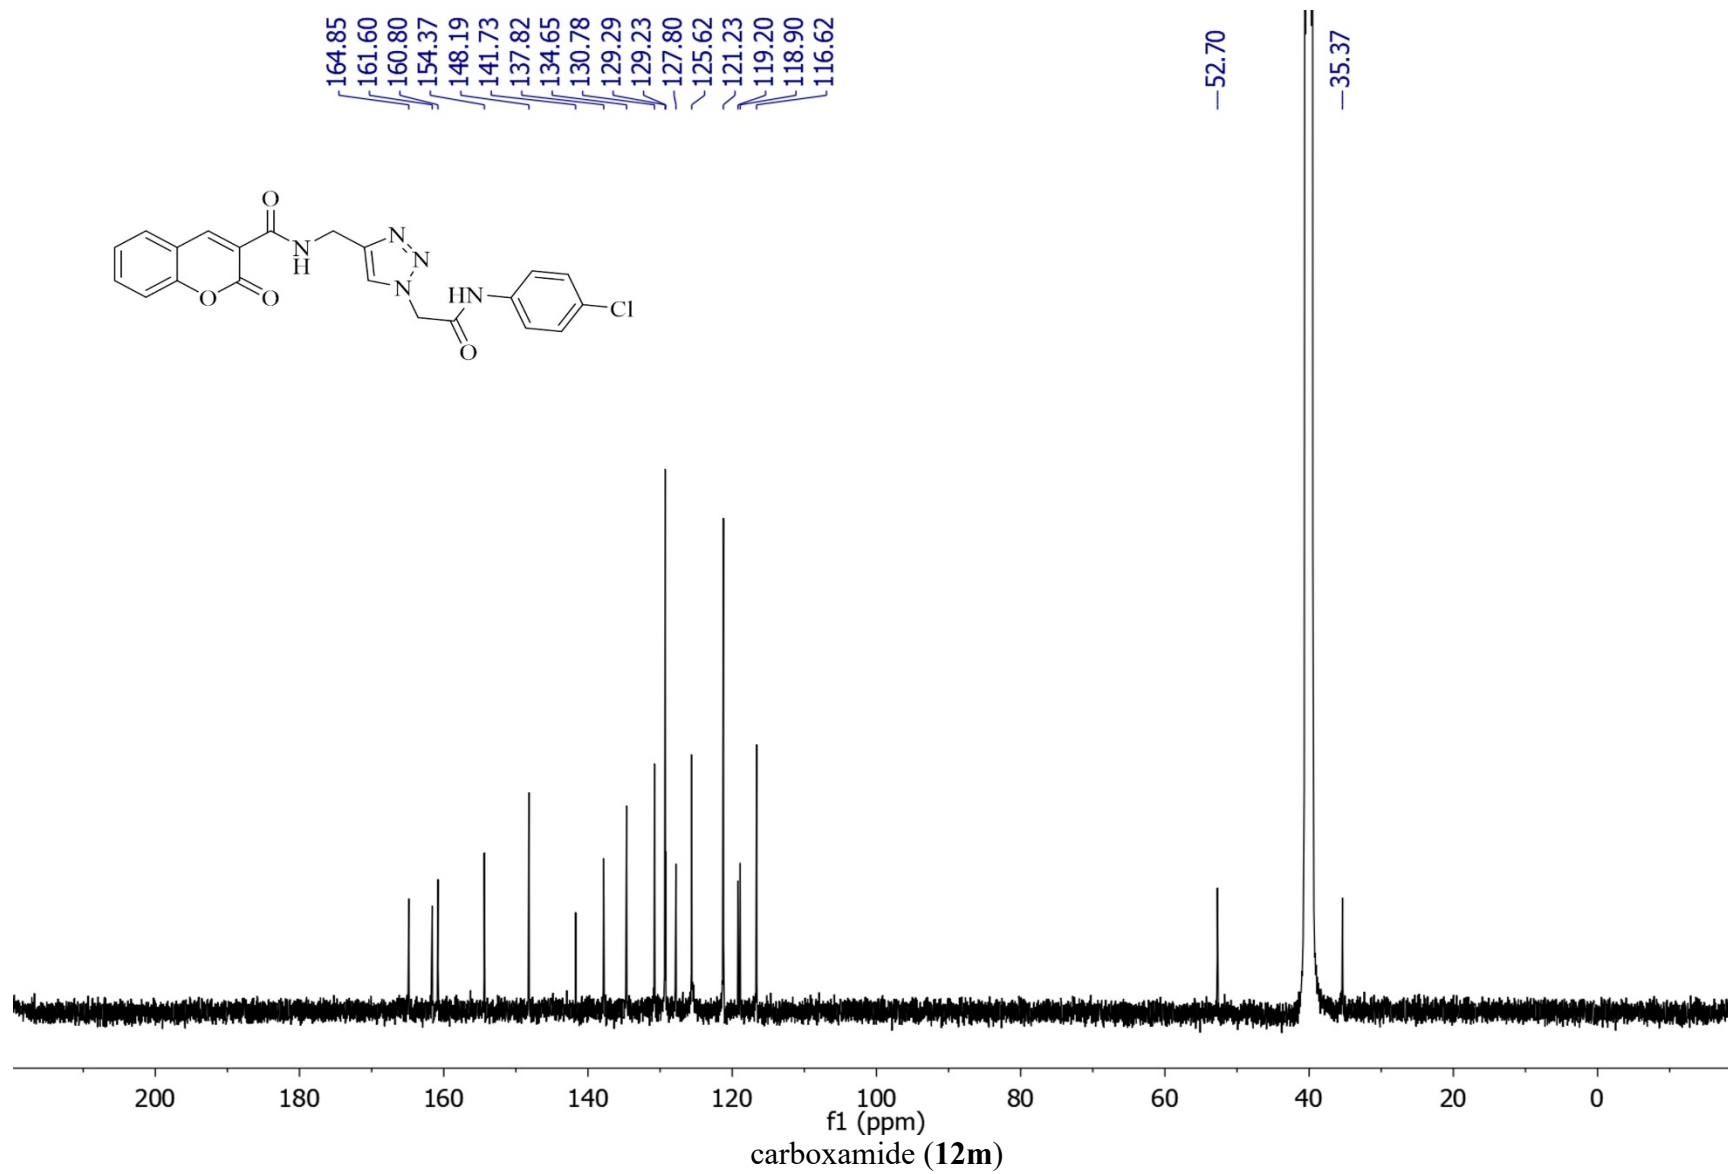



<sup>1</sup>H NMR spectrum of N-((1-(2-((4-bromophenyl)amino)-2-oxoethyl)-1H-1,2,3-triazol-4-yl)methyl)-2-oxo-2H-chromene-3-

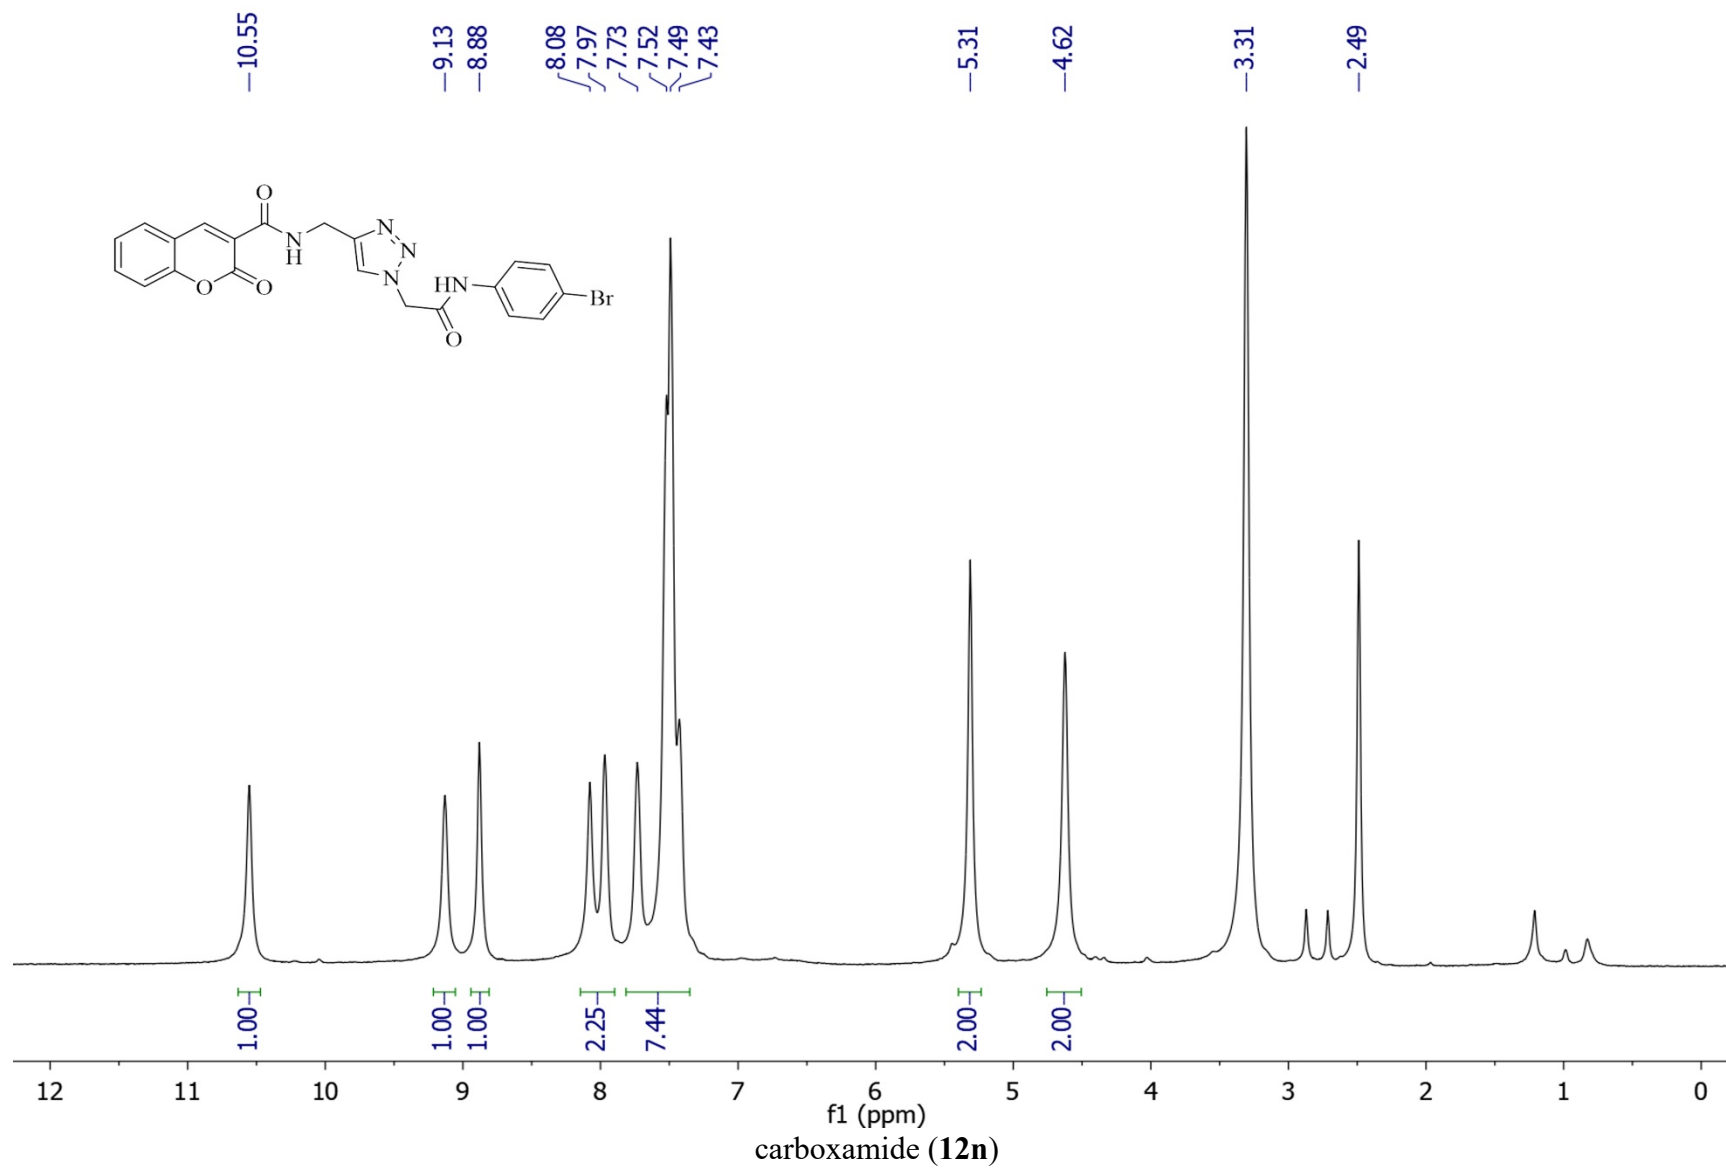

S35



<sup>13</sup>C NMR spectrum of N-((1-(2-((4-bromophenyl)amino)-2-oxoethyl)-1H-1,2,3-triazol-4-yl)methyl)-2-oxo-2H-chromene-3-

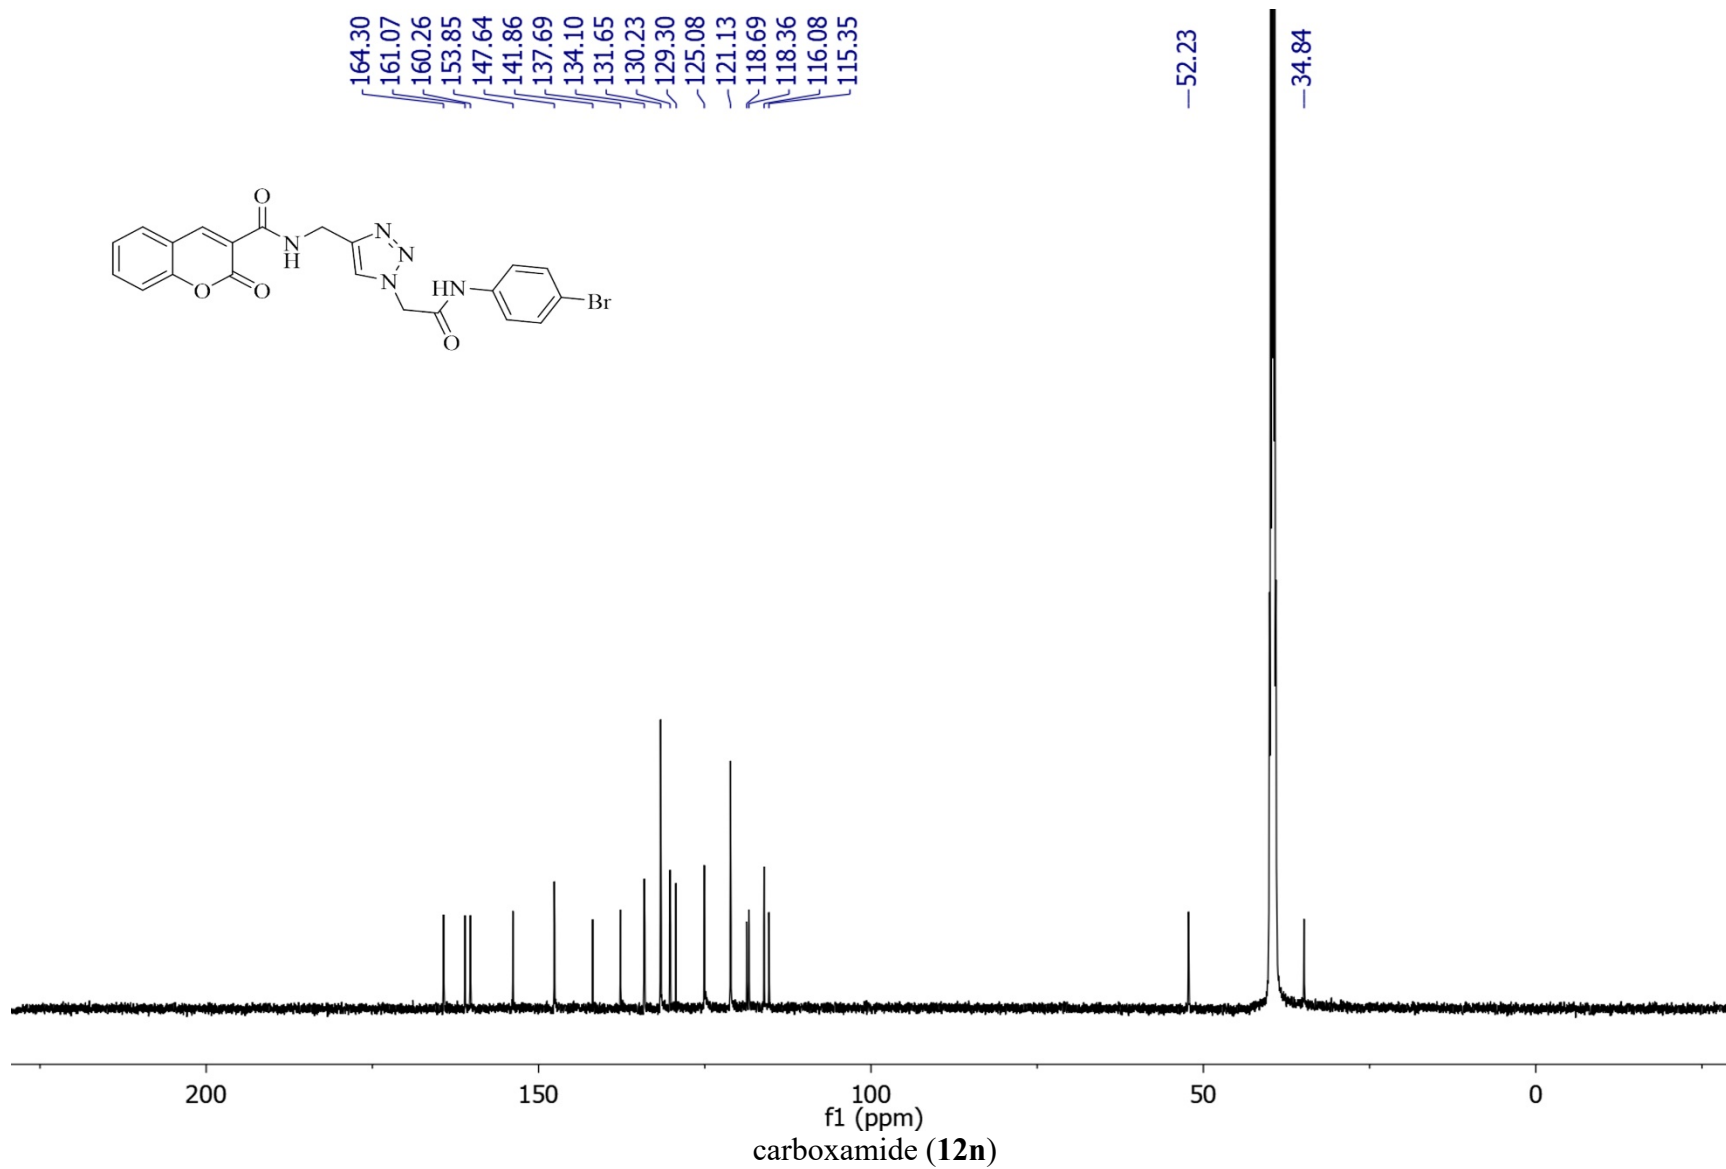

<sup>1</sup>H NMR spectrum of 2-oxo-N-((1-(2-oxo-2-((4-(trifluoromethyl)phenyl)amino)ethyl)-1H-1,2,3-triazol-4-yl)methyl)-2H-chromene-3-carboxamide (**12o**)

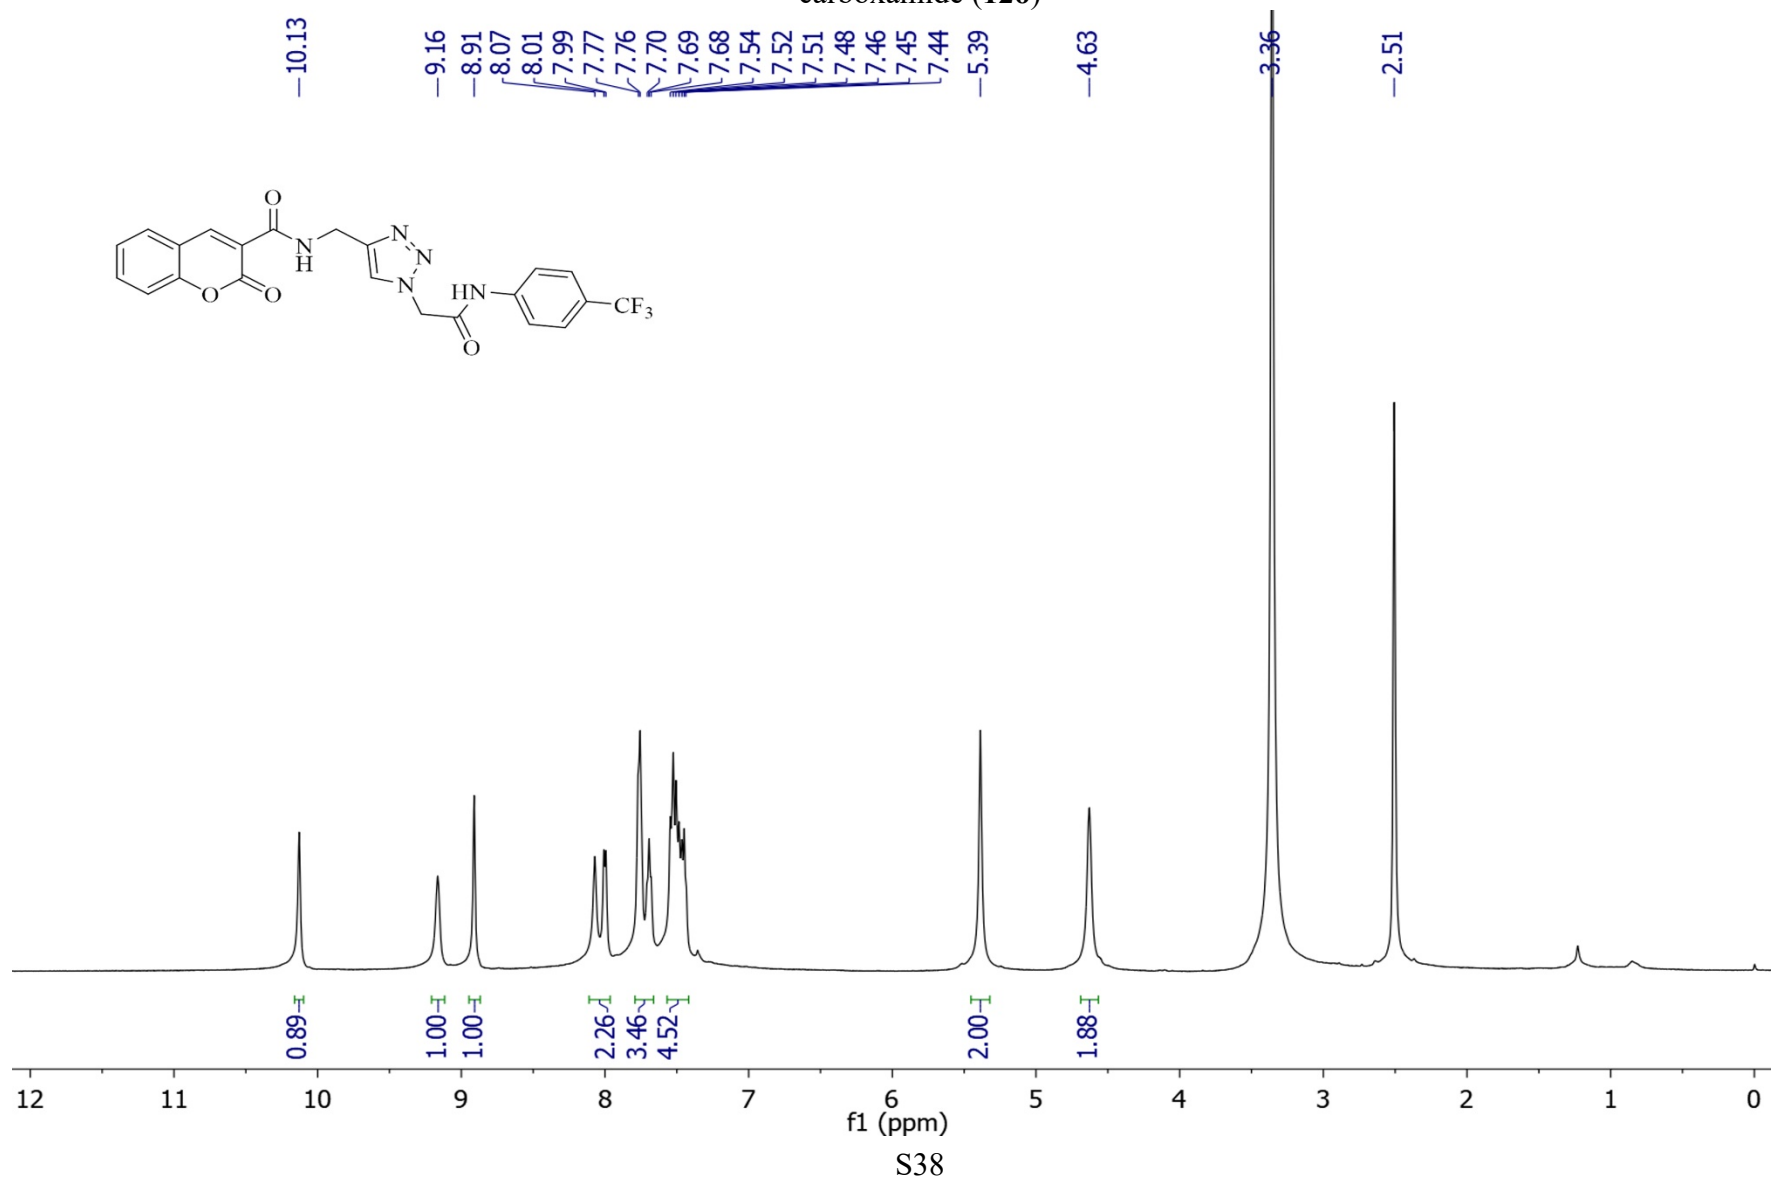

$^{13}\text{C}$  NMR spectrum of 2-oxo-N-((1-(2-oxo-2-((4-(trifluoromethyl)phenyl)amino)ethyl)-1H-1,2,3-triazol-4-yl)methyl)-2H-chromene-3-carboxamide (**12o**)

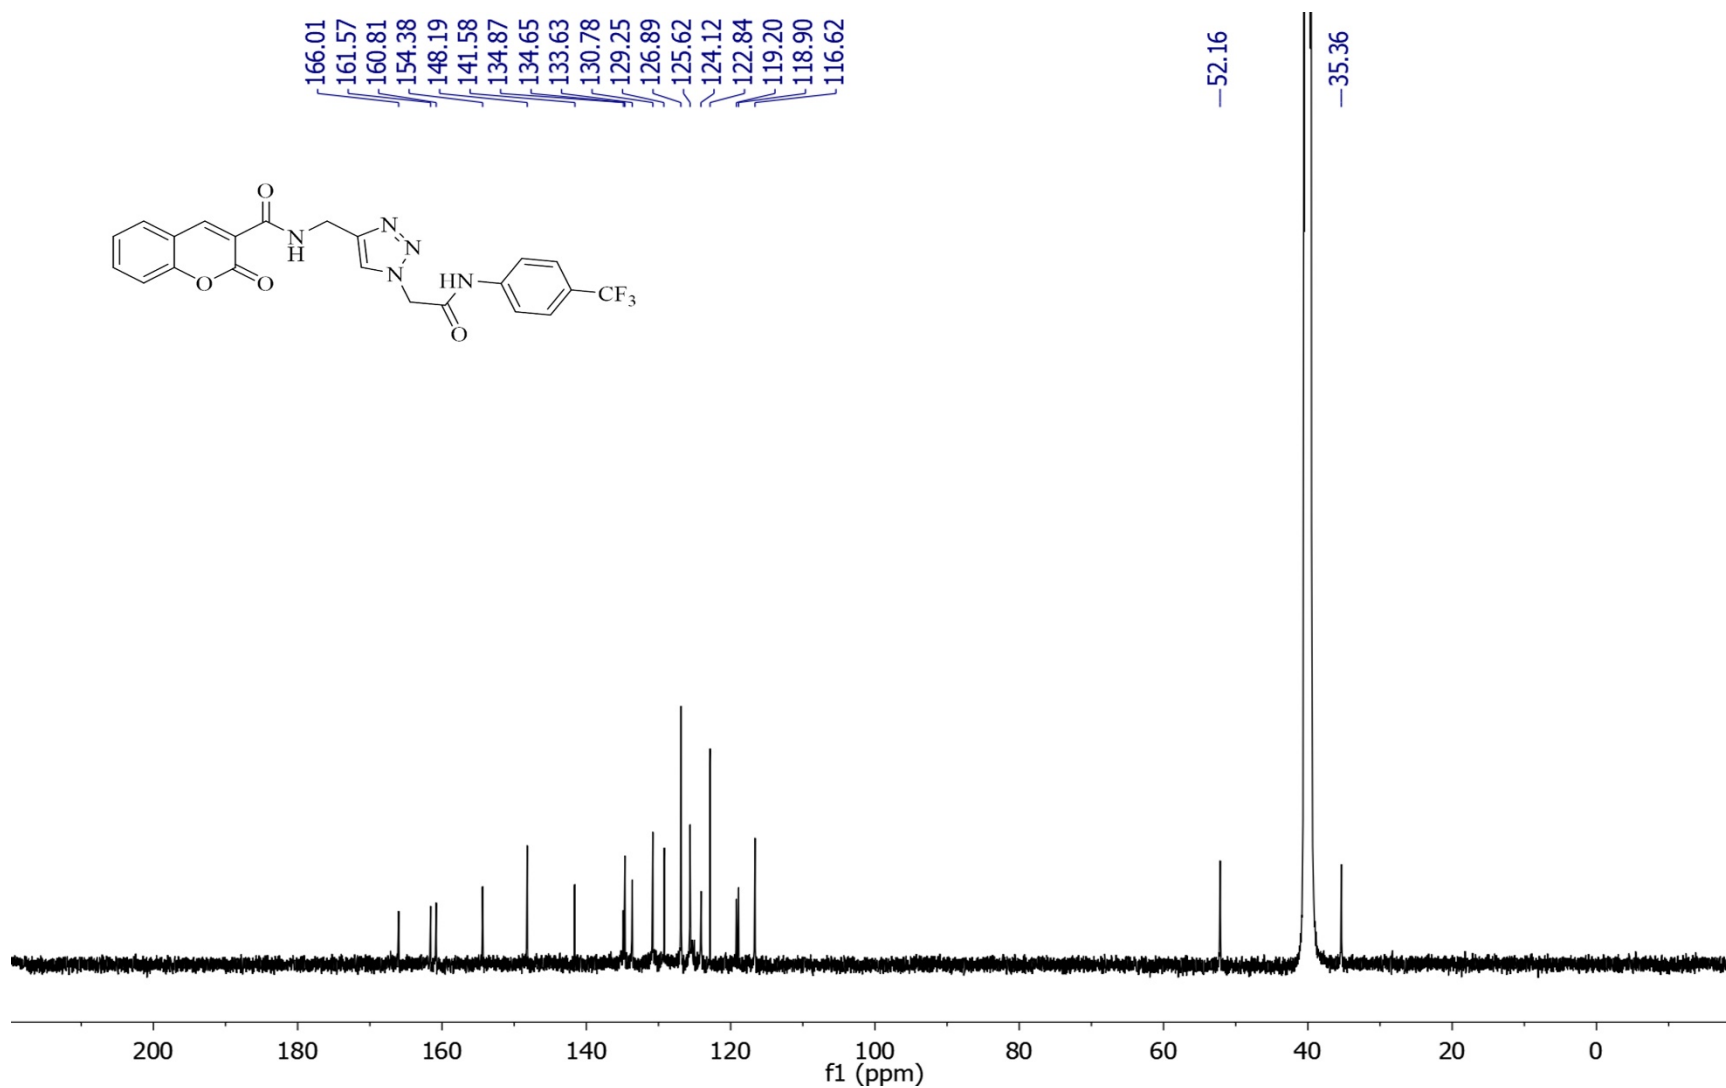

<sup>1</sup>H NMR spectrum of N-((1-(2-((2-cyanophenyl)amino)-2-oxoethyl)-1H-1,2,3-triazol-4-yl)methyl)-2-oxo-2H-chromene-3-

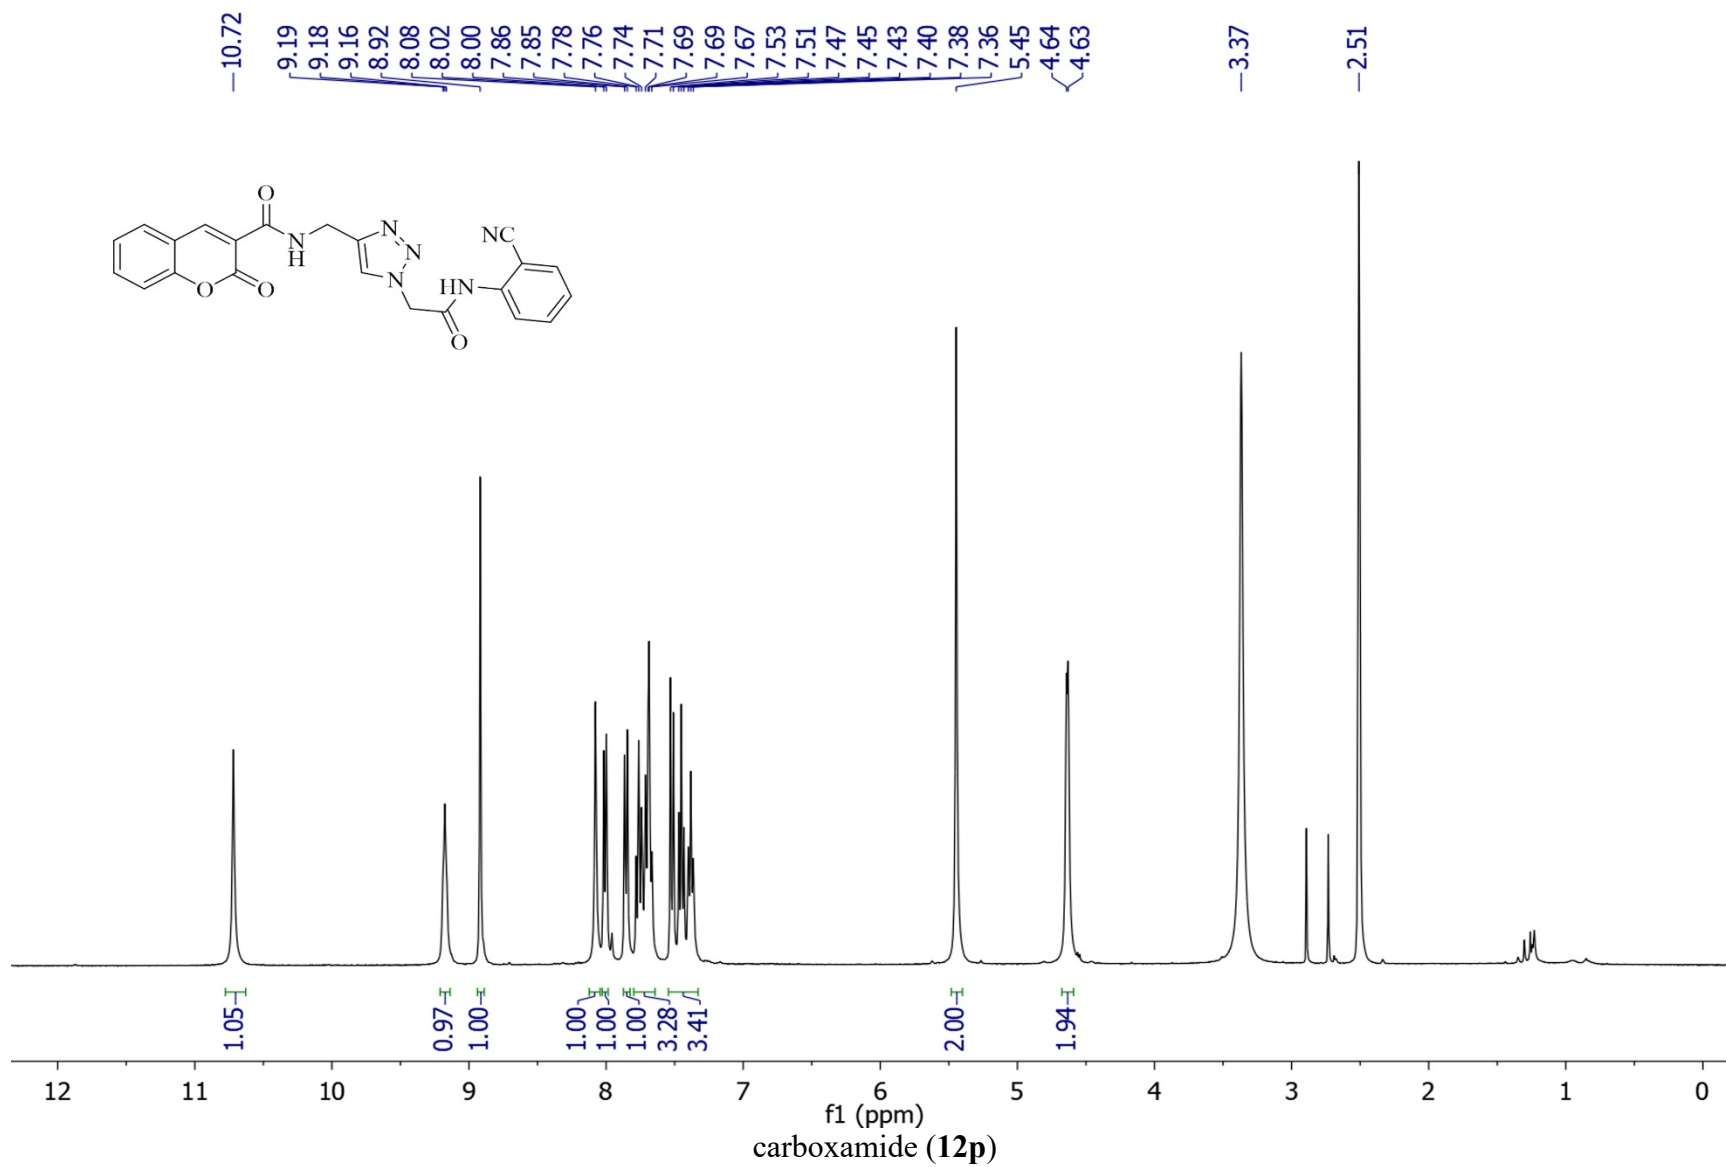



$^{13}\text{C}$  NMR spectrum of N-((1-(2-((2-cyanophenyl)amino)-2-oxoethyl)-1H-1,2,3-triazol-4-yl)methyl)-2-oxo-2H-chromene-3-

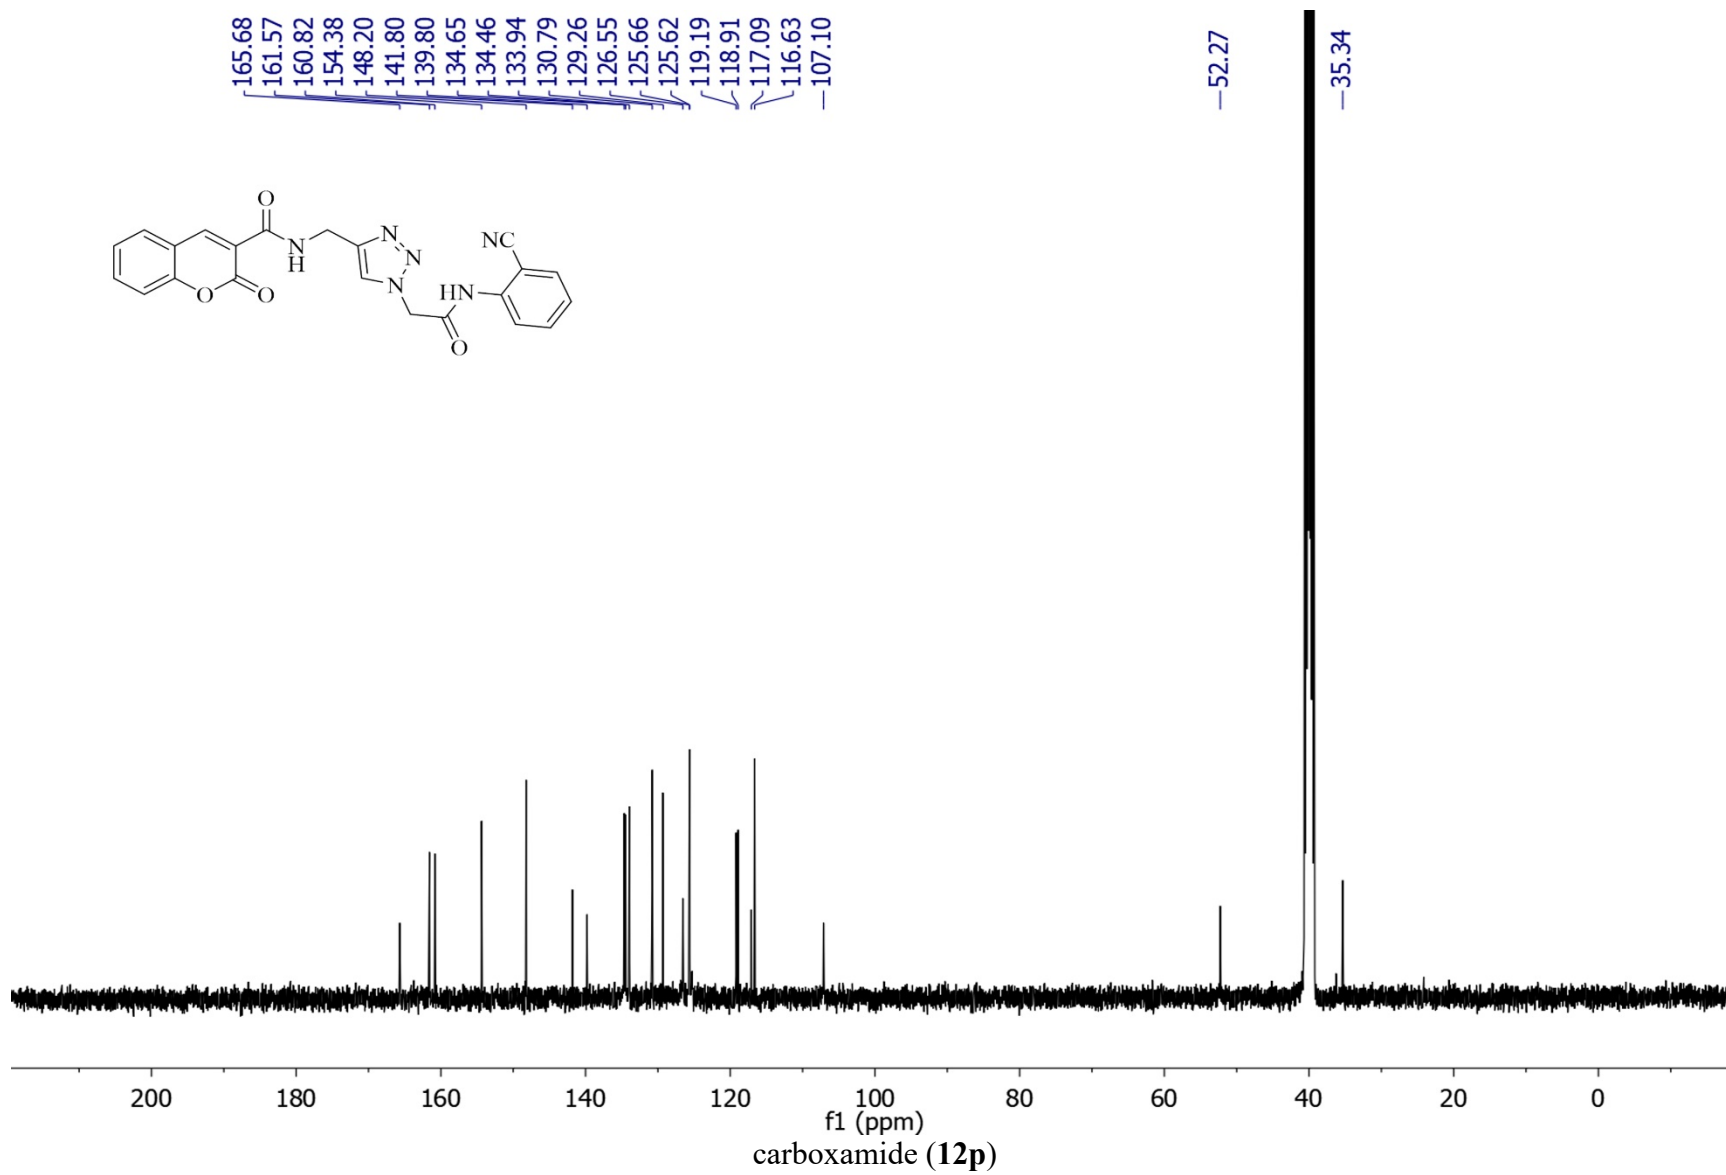



<sup>1</sup>H NMR spectrum of N-((1-(2-((3-cyanophenyl)amino)-2-oxoethyl)-1H-1,2,3-triazol-4-yl)methyl)-2-oxo-2H-chromene-3-

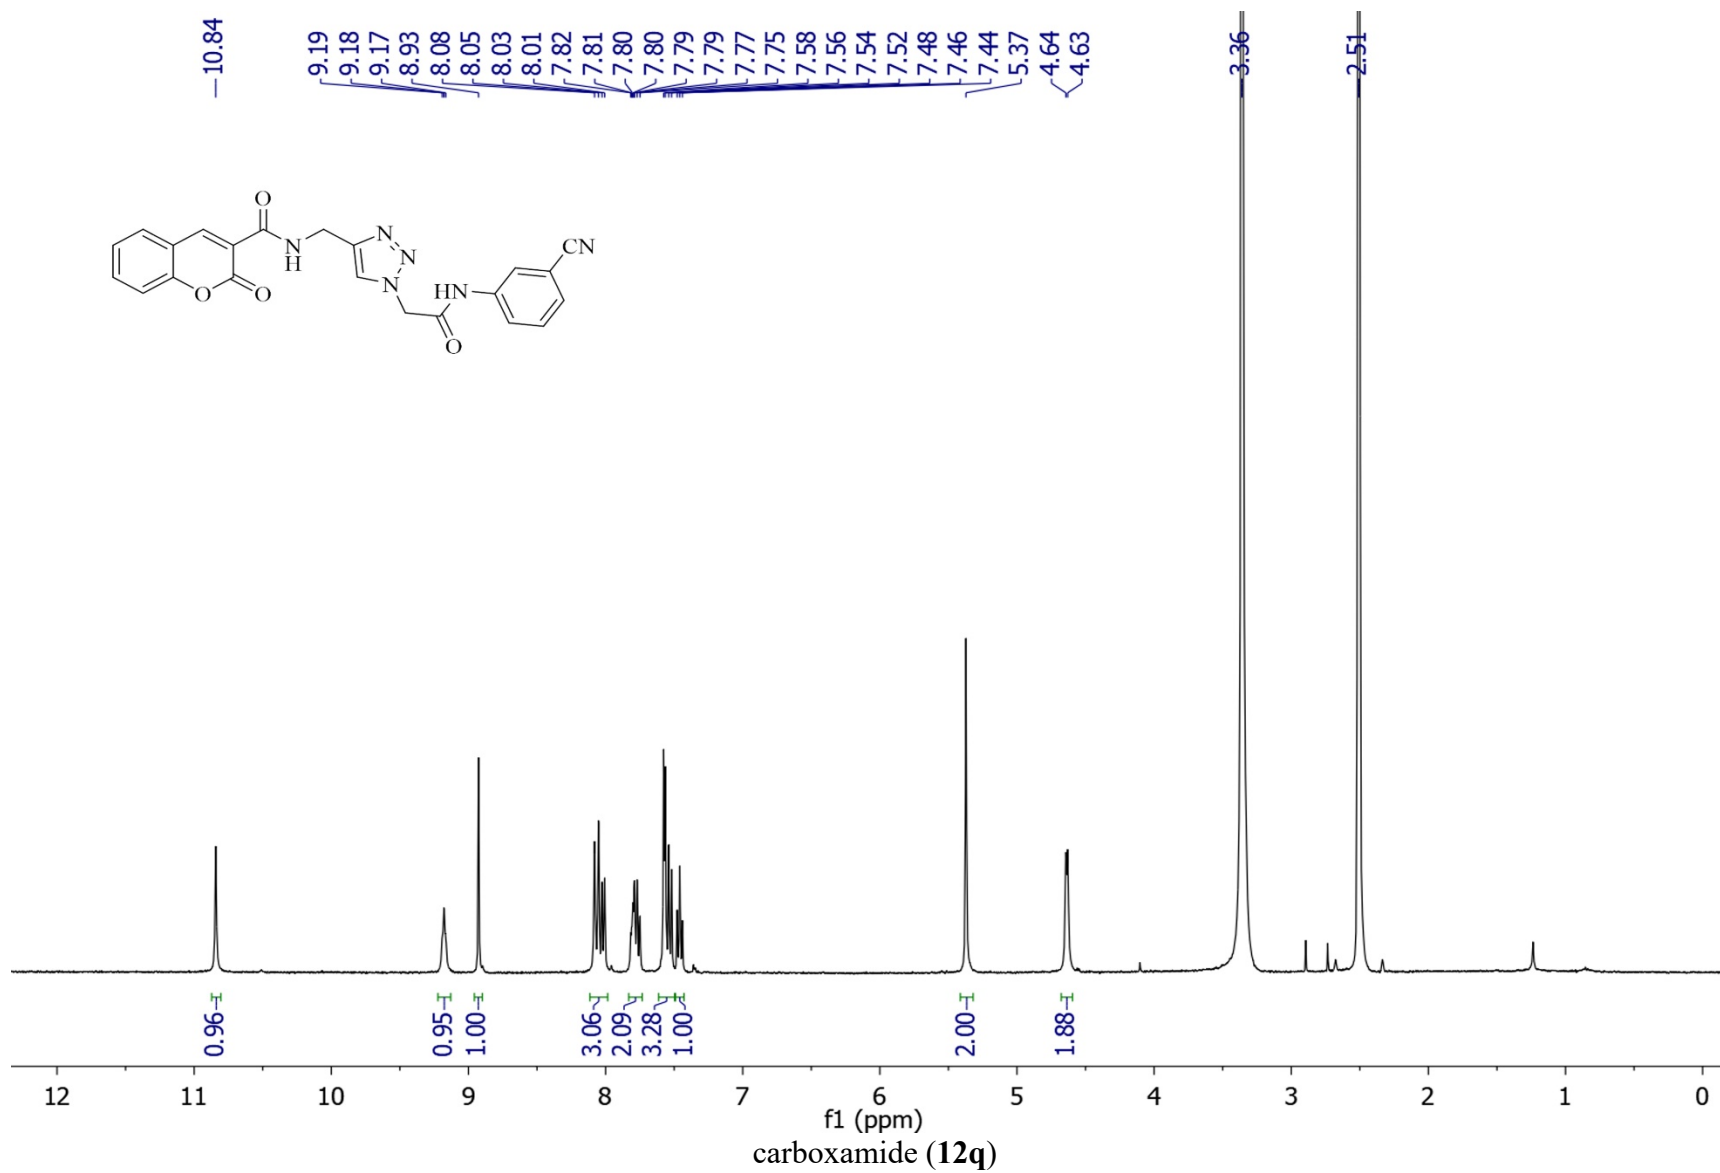



$^{13}\text{C}$  NMR spectrum of N-((1-(2-((3-cyanophenyl)amino)-2-oxoethyl)-1H-1,2,3-triazol-4-yl)methyl)-2-oxo-2H-chromene-3-

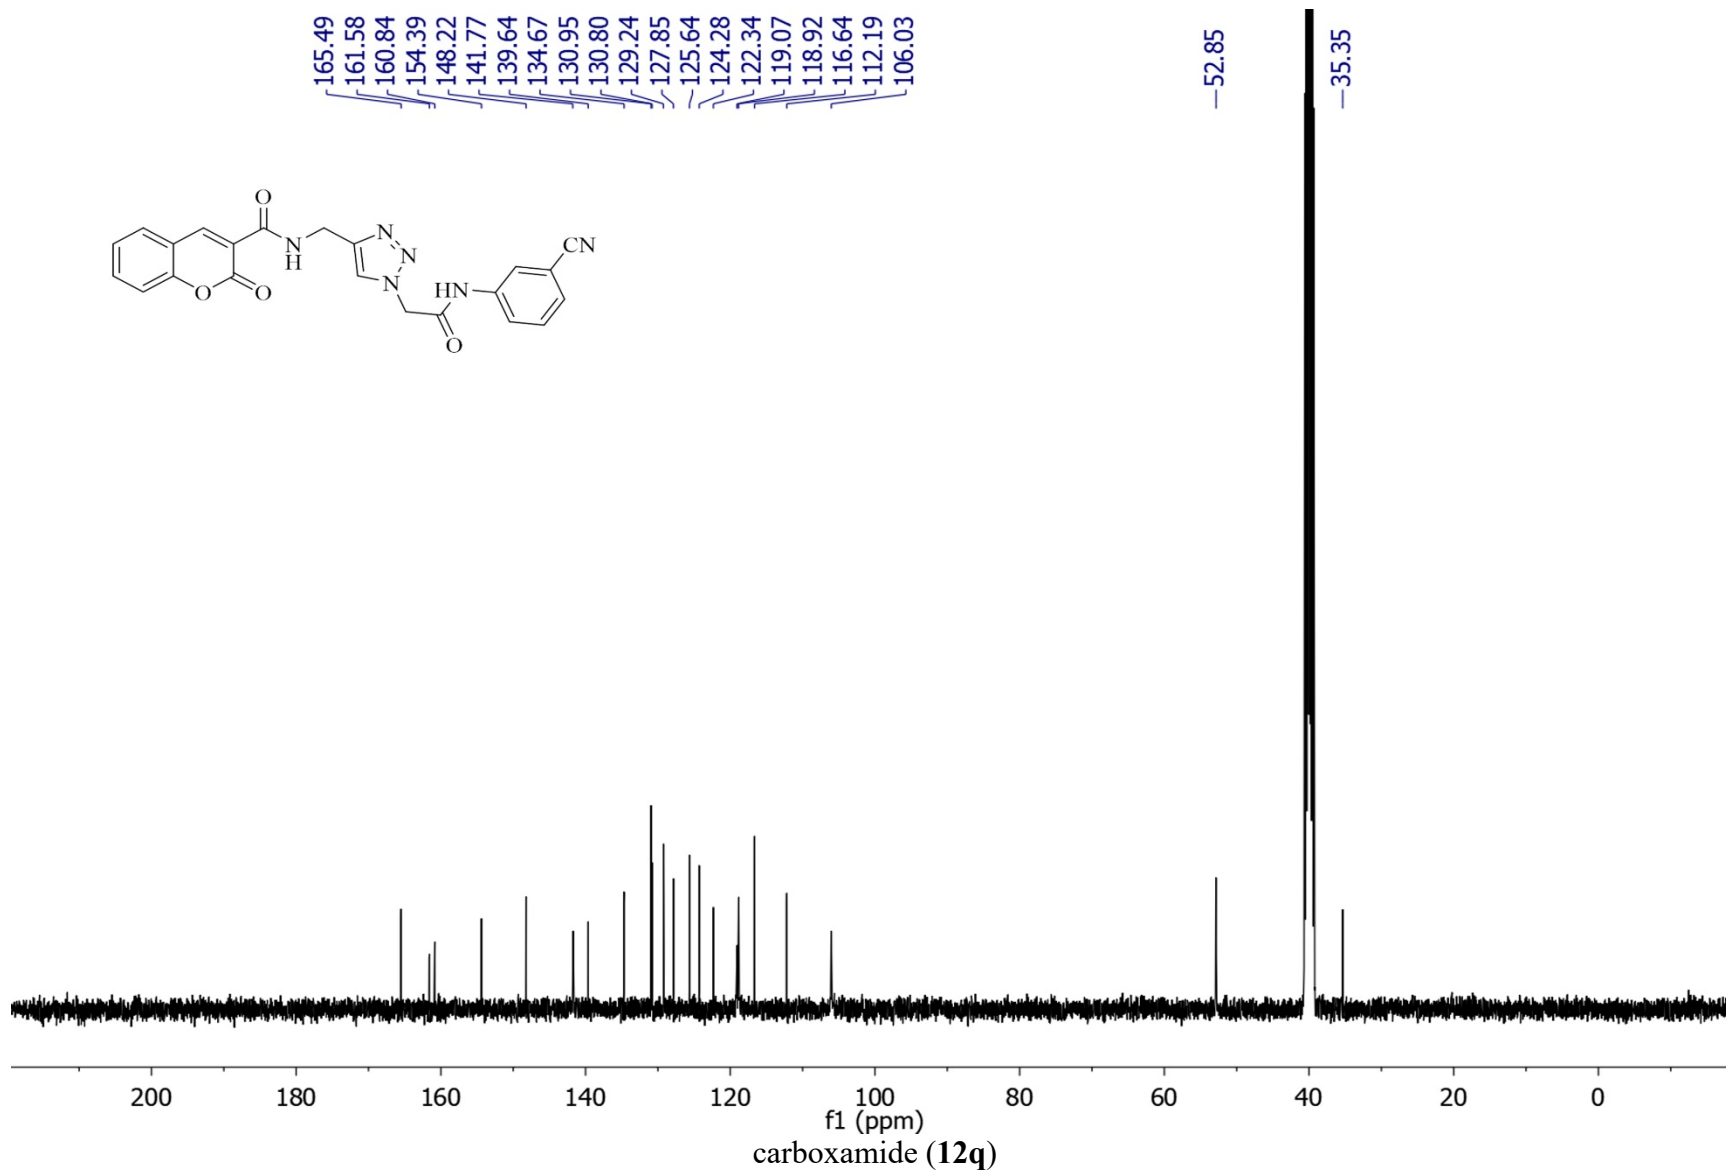



<sup>1</sup>H NMR spectrum of N-((1-(2-((4-cyanophenyl)amino)-2-oxoethyl)-1H-1,2,3-triazol-4-yl)methyl)-2-oxo-2H-chromene-3-

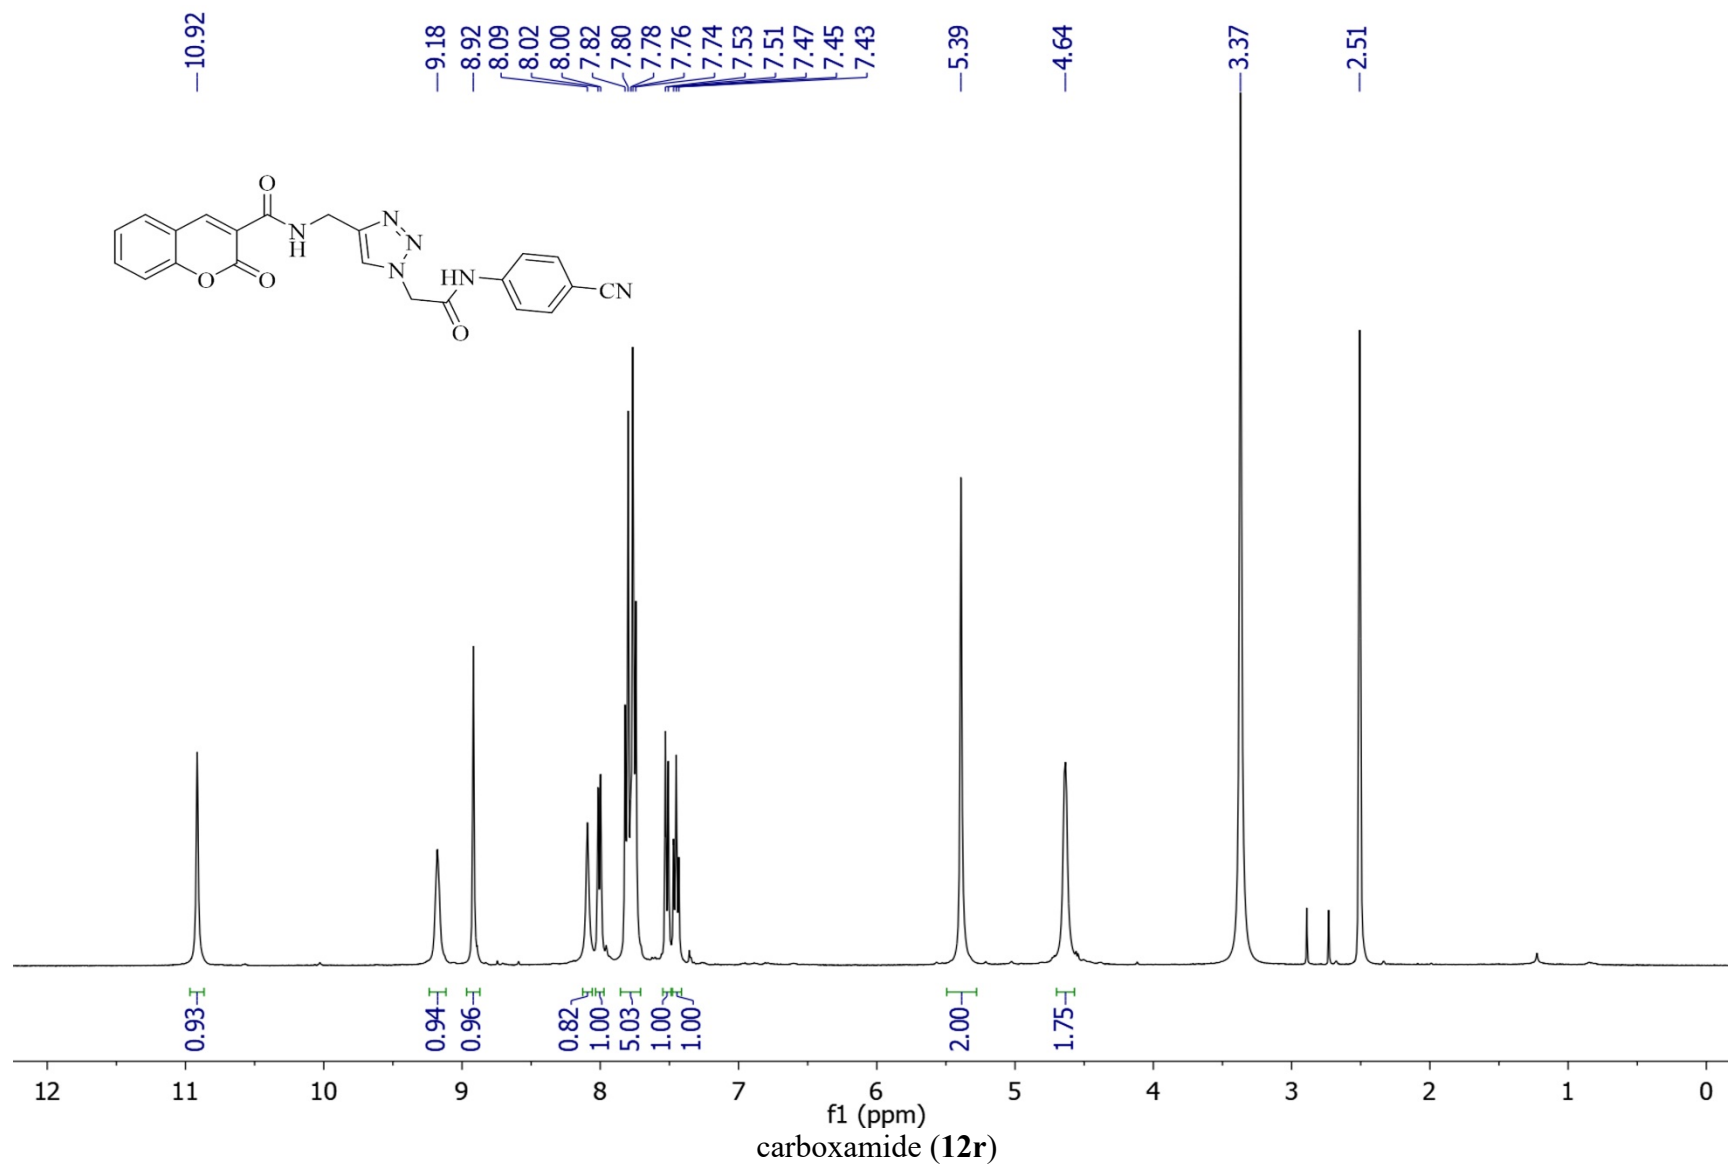



$^{13}\text{C}$  NMR spectrum of N-((1-(2-((4-cyanophenyl)amino)-2-oxoethyl)-1H-1,2,3-triazol-4-yl)methyl)-2-oxo-2H-chromene-3-

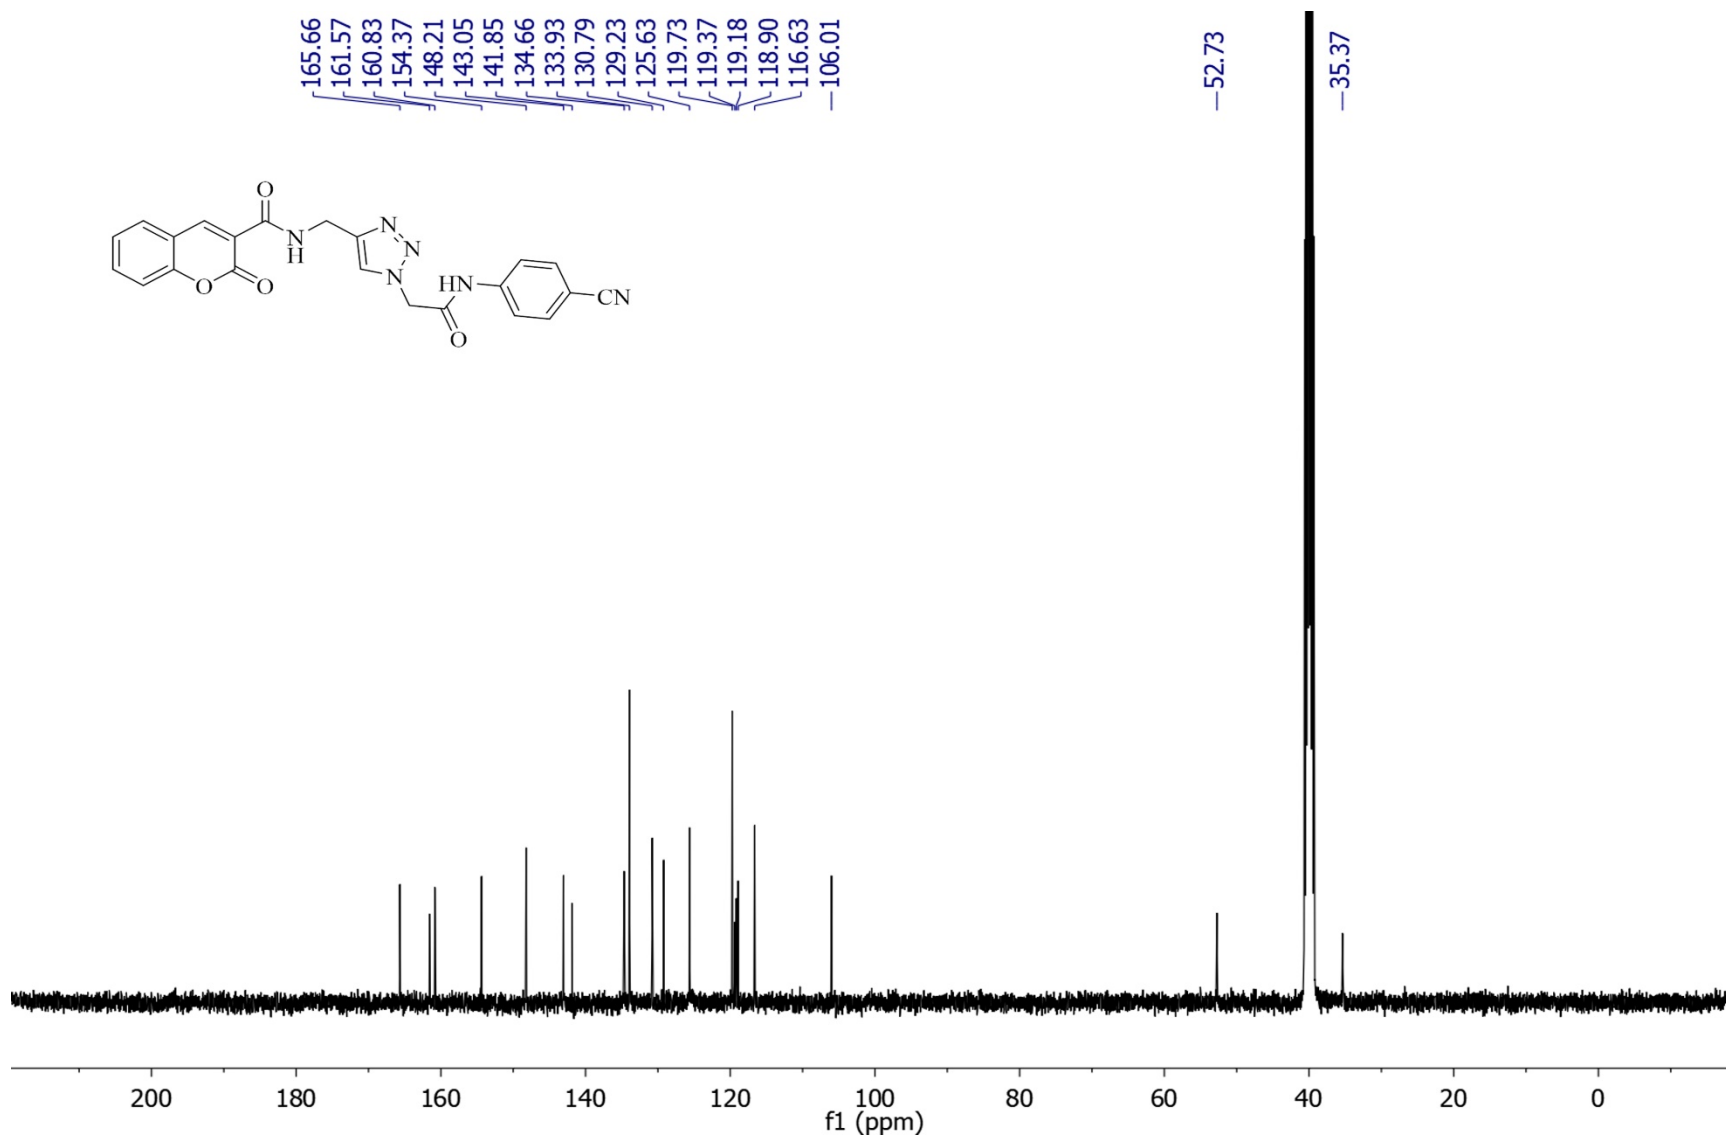

carboxamide (**12r**)

<sup>1</sup>H NMR spectrum of N-((1-benzyl-1H-1,2,3-triazol-4-yl)methyl)-2-oxo-2H-chromene-3-carboxamide (**13**)

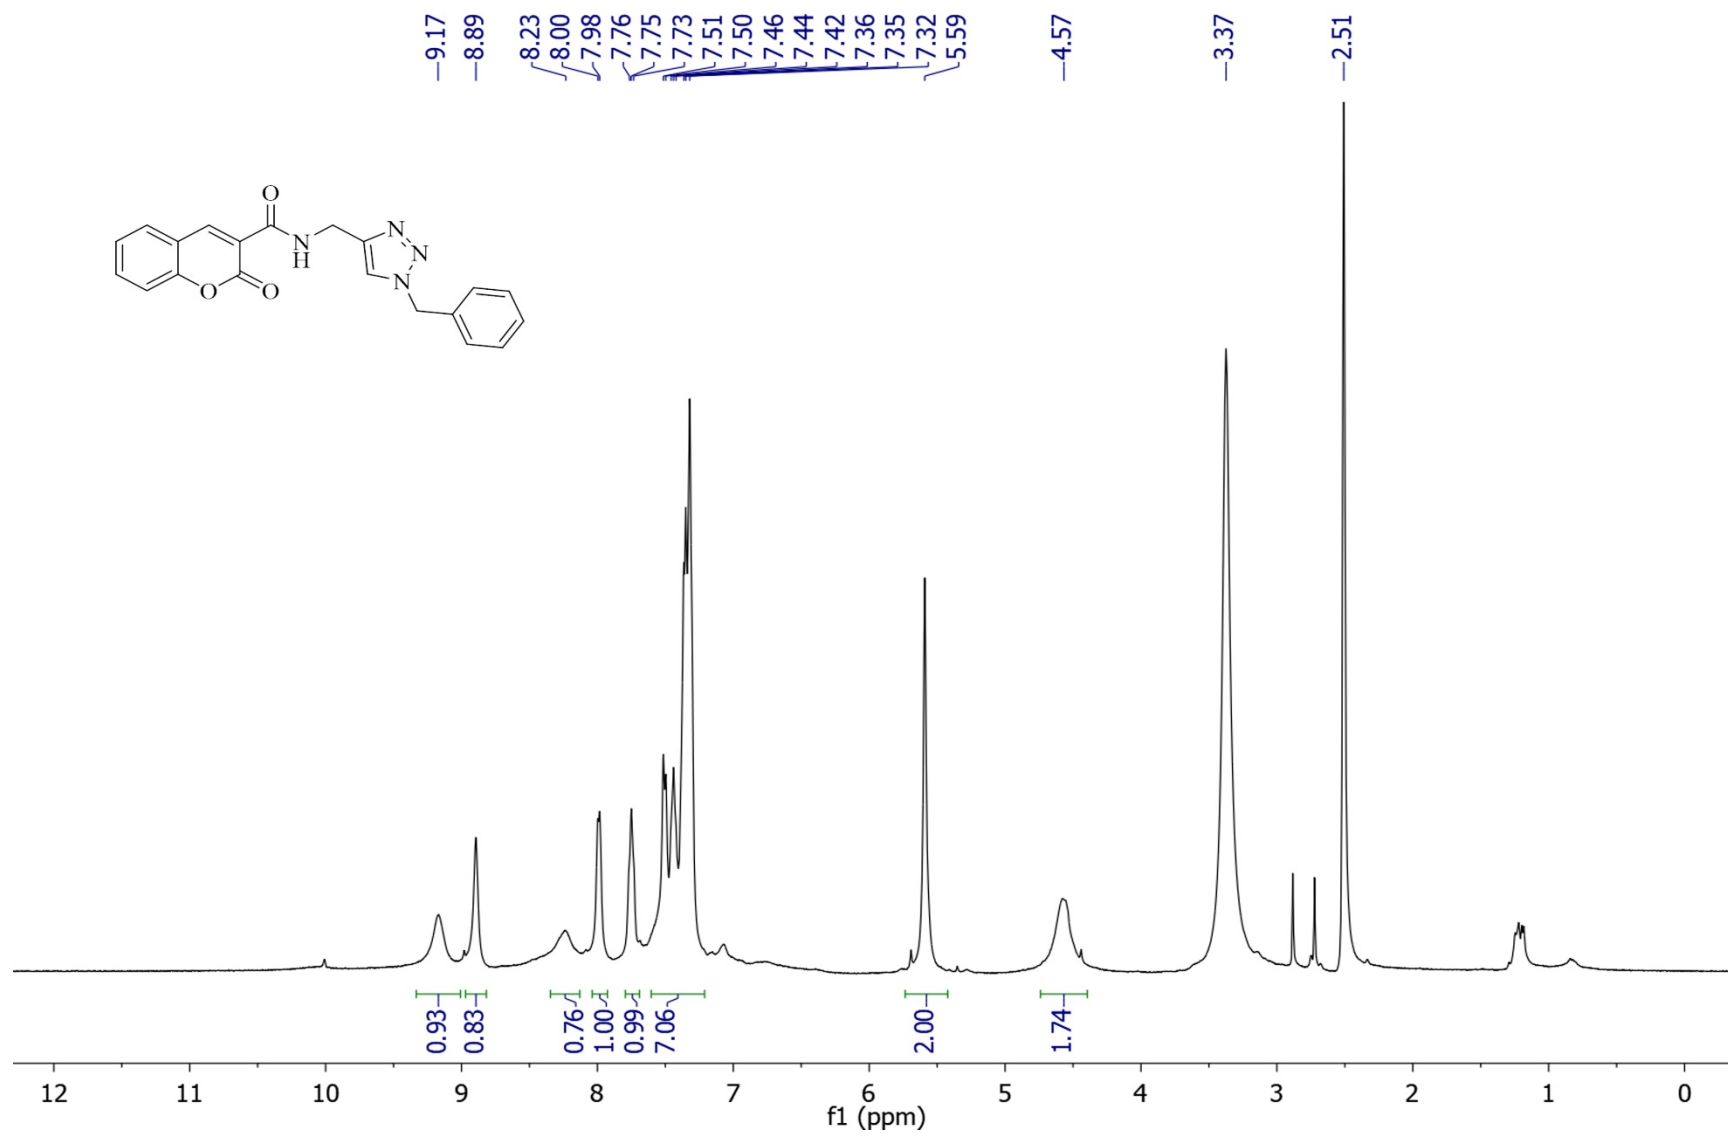

$^{13}\text{C}$  NMR spectrum of N-((1-benzyl-1H-1,2,3-triazol-4-yl)methyl)-2-oxo-2H-chromene-3-carboxamide (**13**)

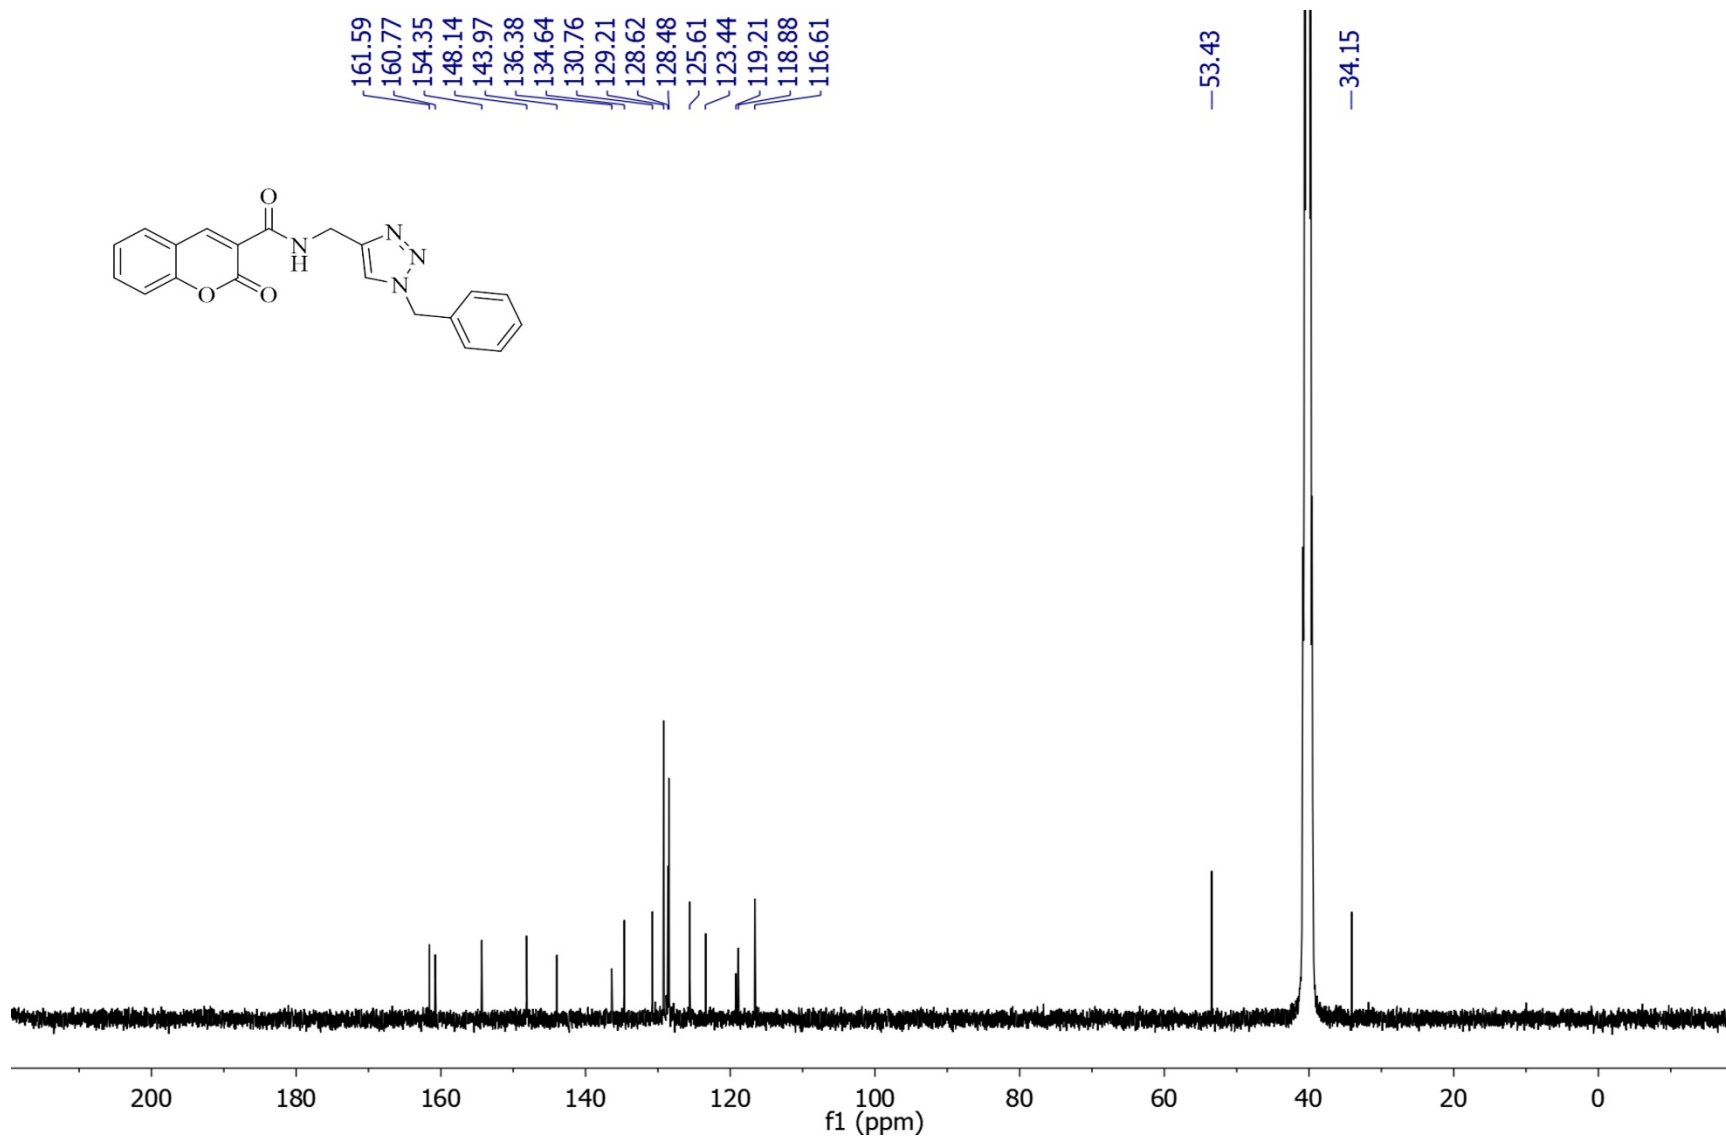



<sup>1</sup>H NMR spectrum of N-((1-(4-chlorobenzyl)-1H-1,2,3-triazol-4-yl)methyl)-2-oxo-2H-chromene-3-carboxamide (**14**)

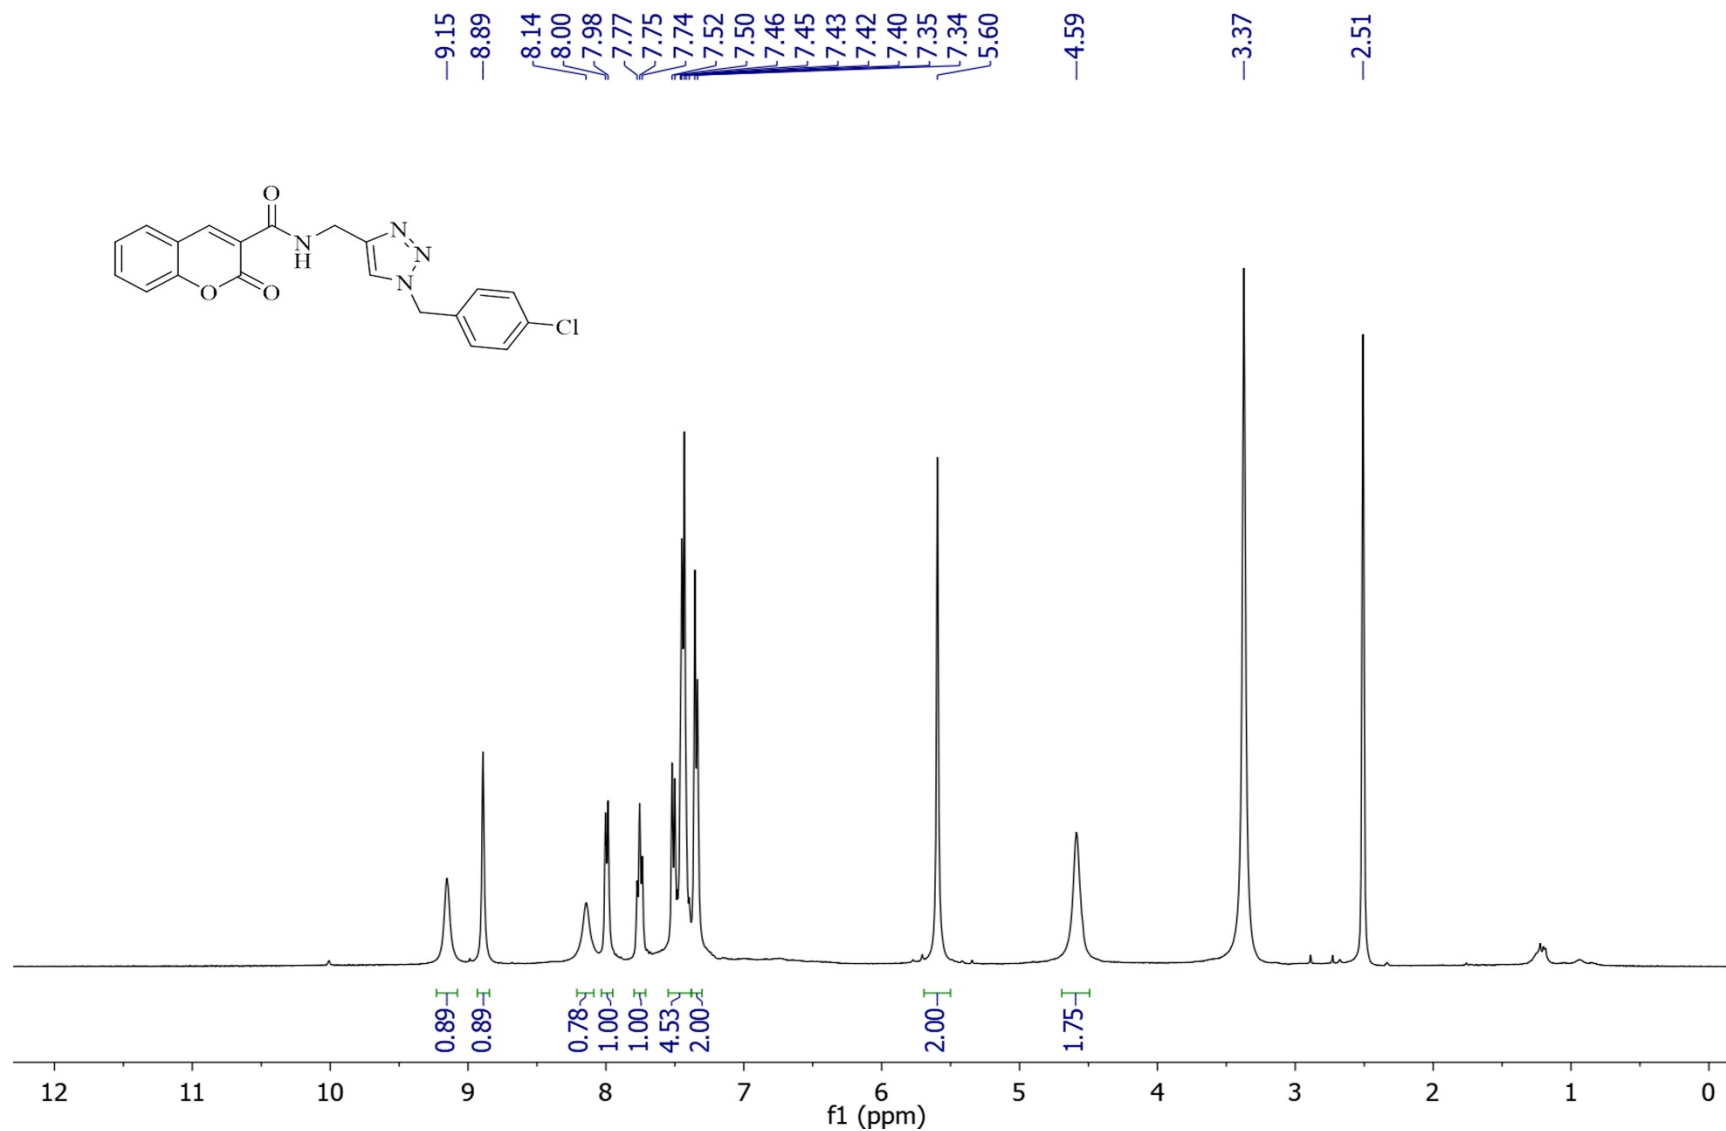

$^{13}\text{C}$  NMR spectrum of N-((1-(4-chlorobenzyl)-1H-1,2,3-triazol-4-yl)methyl)-2-oxo-2H-chromene-3-carboxamide (**14**)

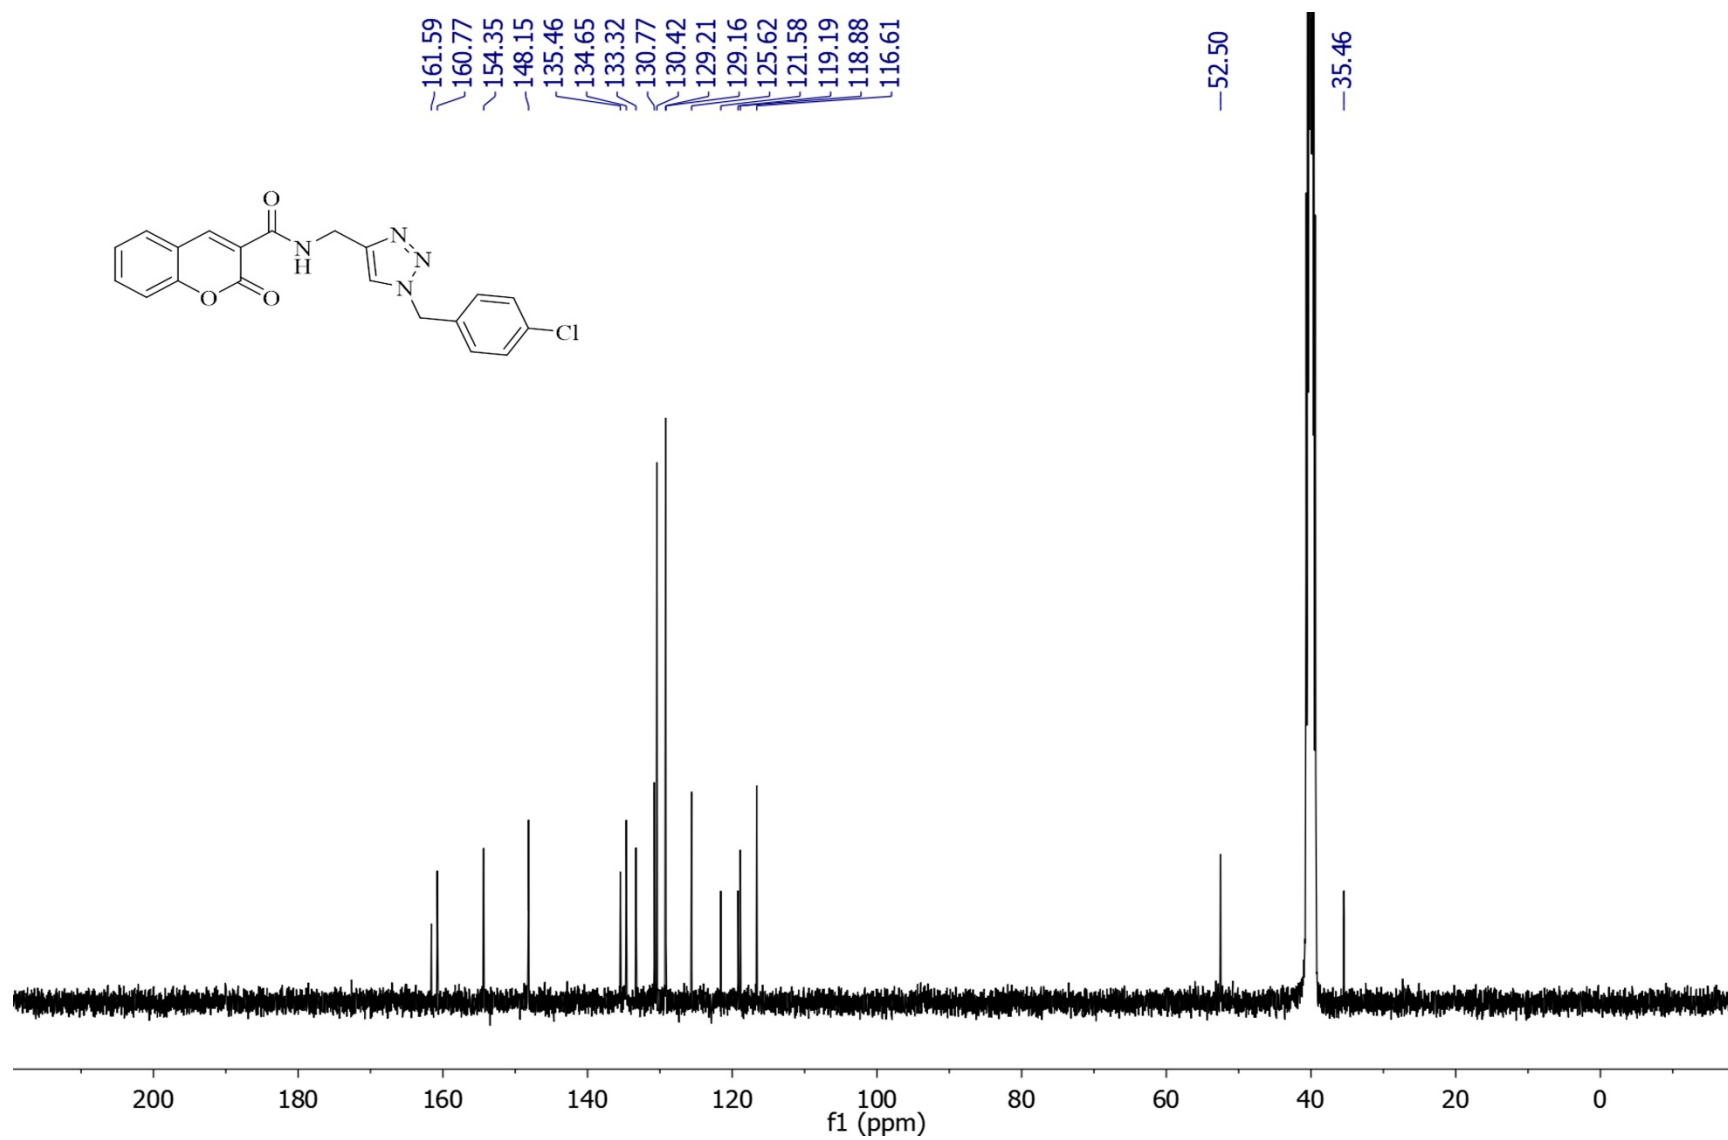

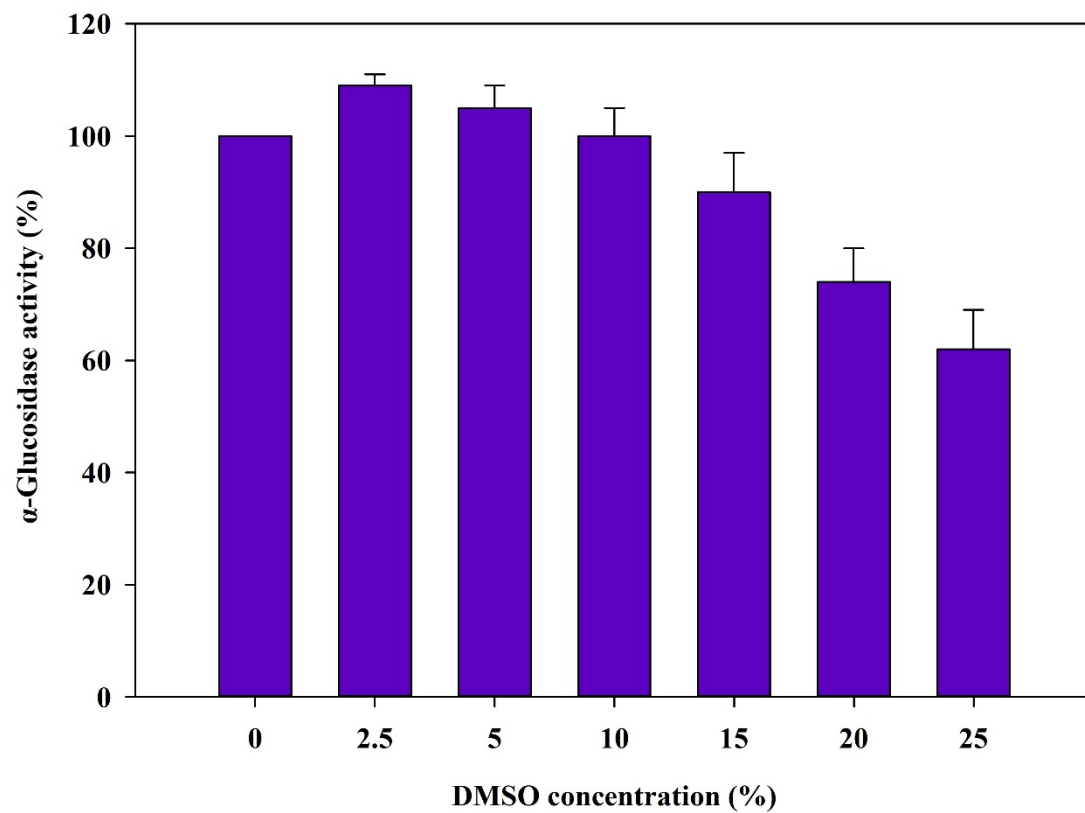

**Figure S-1.** Enzyme activity was measured in the presence of increasing DMSO concentrations (0–25%) to determine the solvent level that does not interfere with assay performance.

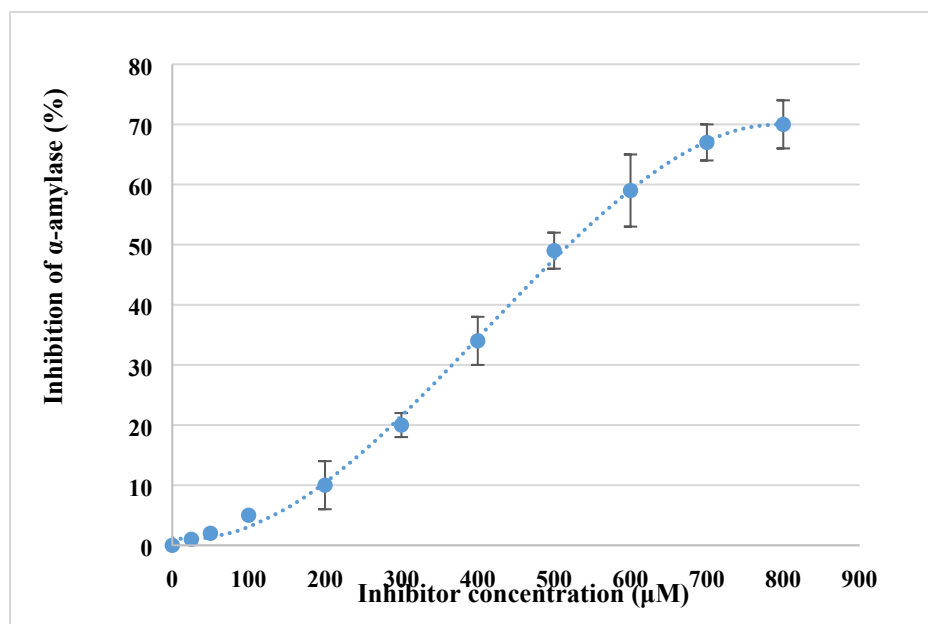

**Figure S-2.** Dose–response curves for  $\alpha$ -amylase inhibition by **12q**.

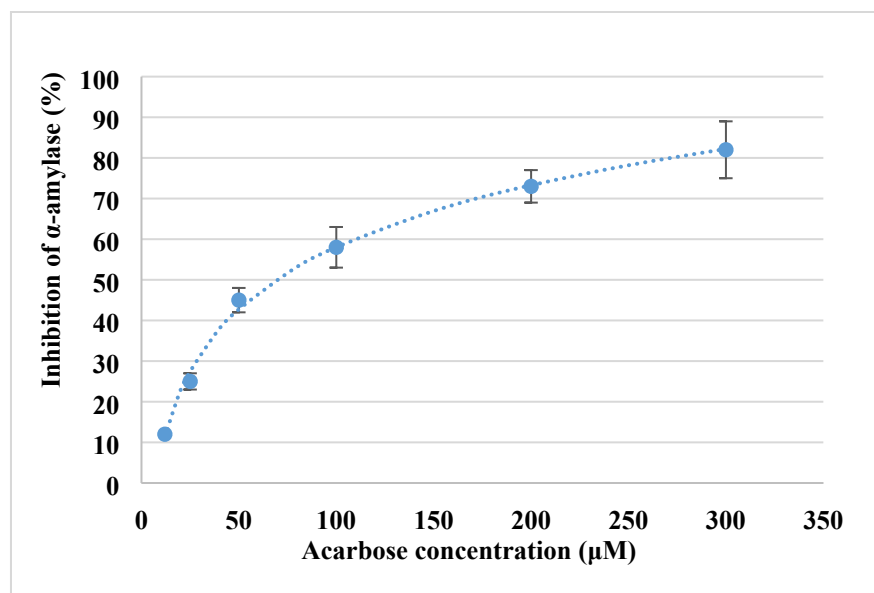

**Figure S-3.** Dose–response curves for  $\alpha$ -amylase inhibition by acarbose

**Table S1.** CD spectral data of the solvent blank (water with DMSO) used for baseline correction.

| <b>Wavelength (nm)</b> | <b>CD (mdeg)</b> |
|------------------------|------------------|
| 260                    | 1.1963           |
| 259.5                  | 1.19802          |
| 259                    | 1.1982           |
| 258.5                  | 1.20673          |
| 258                    | 1.16295          |
| 257.5                  | 1.09961          |
| 257                    | 1.08518          |
| 256.5                  | 1.10869          |
| 256                    | 1.10527          |
| 255.5                  | 1.0702           |
| 255                    | 1.04418          |
| 254.5                  | 0.993123         |
| 254                    | 0.9929           |
| 253.5                  | 1.01156          |
| 253                    | 0.972287         |
| 252.5                  | 0.95024          |
| 252                    | 0.920639         |
| 251.5                  | 0.936825         |
| 251                    | 0.926388         |
| 250.5                  | 0.97096          |
| 250                    | 1.02373          |
| 249.5                  | 1.07491          |
| 249                    | 1.04214          |
| 248.5                  | 1.05364          |
| 248                    | 1.08169          |
| 247.5                  | 1.13542          |
| 247                    | 1.13507          |
| 246.5                  | 1.11929          |
| 246                    | 1.13051          |
| 245.5                  | 1.11745          |

| <b>Wavelength (nm)</b> | <b>CD (mdeg)</b> |
|------------------------|------------------|
| 245                    | 1.11939          |
| 244.5                  | 1.07691          |
| 244                    | 1.00911          |
| 243.5                  | 0.878117         |
| 243                    | 0.784745         |
| 242.5                  | 0.779528         |
| 242                    | 0.72541          |
| 241.5                  | 0.597201         |
| 241                    | 0.488612         |
| 240.5                  | 0.429016         |
| 240                    | 0.30033          |
| 239.5                  | 0.247962         |
| 239                    | 0.205678         |
| 238.5                  | 0.180211         |
| 238                    | 0.091691         |
| 237.5                  | -0.01252         |
| 237                    | -0.05811         |
| 236.5                  | -0.14555         |
| 236                    | -0.24777         |
| 235.5                  | -0.31106         |
| 235                    | -0.30598         |
| 234.5                  | -0.49671         |
| 234                    | -0.62714         |
| 233.5                  | -0.64007         |
| 233                    | -0.76206         |
| 232.5                  | -0.91259         |
| 232                    | -1.08762         |
| 231.5                  | -1.17577         |
| 231                    | -1.25956         |
| 230.5                  | -1.32298         |
| 230                    | -1.31352         |

| <b>Wavelength (nm)</b> | <b>CD (mdeg)</b> |
|------------------------|------------------|
| 229.5                  | -1.35574         |
| 229                    | -1.38129         |
| 228.5                  | -1.5988          |
| 228                    | -1.50233         |
| 227.5                  | -1.33652         |
| 227                    | -1.42413         |
| 226.5                  | -1.33822         |
| 226                    | -1.06087         |
| 225.5                  | -1.03964         |
| 225                    | -0.88397         |
| 224.5                  | -0.77679         |
| 224                    | -0.82783         |
| 223.5                  | -0.56831         |
| 223                    | -0.15279         |
| 222.5                  | 0.25508          |
| 222                    | 0.679651         |
| 221.5                  | 1.04706          |
| 221                    | 1.23776          |
| 220.5                  | 1.25732          |
| 220                    | 1.9003           |
| 219.5                  | 2.06704          |
| 219                    | 2.12142          |
| 218.5                  | 2.54505          |
| 218                    | 2.8199           |
| 217.5                  | 3.25677          |
| 217                    | 3.52899          |
| 216.5                  | 3.58734          |
| 216                    | 3.30788          |
| 215.5                  | 2.94046          |
| 215                    | 3.05161          |
| 214.5                  | 3.36373          |

| <b>Wavelength (nm)</b> | <b>CD (mdeg)</b> |
|------------------------|------------------|
| 214                    | 2.65477          |
| 213.5                  | 2.06609          |
| 213                    | 1.45921          |
| 212.5                  | 1.63032          |
| 212                    | 1.71812          |
| 211.5                  | 1.92864          |
| 211                    | 1.7839           |
| 210.5                  | 1.60022          |
| 210                    | 1.43445          |
| 209.5                  | 1.14506          |
| 209                    | 2.30544          |
| 208.5                  | 2.74118          |
| 208                    | 3.26309          |
| 207.5                  | 4.54237          |
| 207                    | 5.68096          |
| 206.5                  | 6.92148          |
| 206                    | 7.27819          |
| 205.5                  | 7.82798          |
| 205                    | 7.69413          |
| 204.5                  | 7.35949          |
| 204                    | 8.6152           |
| 203.5                  | 9.49045          |
| 203                    | 10.6722          |
| 202.5                  | 10.9402          |
| 202                    | 11.9375          |
| 201.5                  | 11.9339          |
| 201                    | 12.207           |
| 200.5                  | 12.6552          |
| 200                    | 12.4207          |
| 199.5                  | 12.3234          |
| 199                    | 13.2958          |

| <b>Wavelength (nm)</b> | <b>CD (mdeg)</b> |
|------------------------|------------------|
| 198.5                  | 14.1087          |
| 198                    | 16.1749          |
| 197.5                  | 17.6393          |
| 197                    | 19.0784          |
| 196.5                  | 18.8805          |
| 196                    | 19.5819          |
| 195.5                  | 14.5158          |
| 195                    | 15.0761          |
| 194.5                  | 14.7716          |
| 194                    | 9.67434          |
| 193.5                  | 7.61862          |
| 193                    | 10.5225          |
| 192.5                  | 15.5618          |
| 192                    | 15.1041          |
| 191.5                  | 15.2314          |
| 191                    | 8.63095          |
| 190.5                  | 1.54781          |
| 190                    | -6.44348         |

**Table S2.** Raw CD spectral data of  $\alpha$ -glucosidase in the presence of inhibitor in water containing DMSO.

| <b>Wavelength (nm)</b> | <b>CD (mdeg)</b> |
|------------------------|------------------|
| 260                    | 1.47841          |
| 259.5                  | 1.49801          |
| 259                    | 1.4527           |
| 258.5                  | 1.46355          |
| 258                    | 1.42172          |
| 257.5                  | 1.42919          |
| 257                    | 1.34776          |
| 256.5                  | 1.36061          |

| <b>Wavelength (nm)</b> | <b>CD (mdeg)</b> |
|------------------------|------------------|
| 256                    | 1.30789          |
| 255.5                  | 1.29593          |
| 255                    | 1.2904           |
| 254.5                  | 1.27279          |
| 254                    | 1.24084          |
| 253.5                  | 1.24212          |
| 253                    | 1.21946          |
| 252.5                  | 1.18912          |
| 252                    | 1.183            |
| 251.5                  | 1.16528          |
| 251                    | 1.12078          |
| 250.5                  | 1.05767          |
| 250                    | 0.984872         |
| 249.5                  | 0.956555         |
| 249                    | 0.923476         |
| 248.5                  | 0.932481         |
| 248                    | 0.862227         |
| 247.5                  | 0.784867         |
| 247                    | 0.779057         |
| 246.5                  | 0.75924          |
| 246                    | 0.731561         |
| 245.5                  | 0.680909         |
| 245                    | 0.639178         |
| 244.5                  | 0.586439         |
| 244                    | 0.620979         |
| 243.5                  | 0.668407         |
| 243                    | 0.685207         |
| 242.5                  | 0.692979         |
| 242                    | 0.648941         |
| 241.5                  | 0.578315         |

| <b>Wavelength (nm)</b> | <b>CD (mdeg)</b> |
|------------------------|------------------|
| 241                    | 0.608456         |
| 240.5                  | 0.552338         |
| 240                    | 0.498001         |
| 239.5                  | 0.444381         |
| 239                    | 0.440189         |
| 238.5                  | 0.382521         |
| 238                    | 0.343761         |
| 237.5                  | 0.246739         |
| 237                    | 0.081972         |
| 236.5                  | -0.06679         |
| 236                    | -0.18944         |
| 235.5                  | -0.29811         |
| 235                    | -0.45043         |
| 234.5                  | -0.58531         |
| 234                    | -0.68964         |
| 233.5                  | -0.82703         |
| 233                    | -0.96908         |
| 232.5                  | -1.10571         |
| 232                    | -1.29221         |
| 231.5                  | -1.3456          |
| 231                    | -1.46331         |
| 230.5                  | -1.56886         |
| 230                    | -1.69475         |
| 229.5                  | -1.7805          |
| 229                    | -1.92364         |
| 228.5                  | -2.02268         |
| 228                    | -2.11756         |
| 227.5                  | -2.19798         |
| 227                    | -2.33187         |
| 226.5                  | -2.39658         |

| <b>Wavelength (nm)</b> | <b>CD (mdeg)</b> |
|------------------------|------------------|
| 226                    | -2.53175         |
| 225.5                  | -2.56103         |
| 225                    | -2.63893         |
| 224.5                  | -2.85936         |
| 224                    | -2.88697         |
| 223.5                  | -2.87772         |
| 223                    | -2.86211         |
| 222.5                  | -2.95564         |
| 222                    | -2.97639         |
| 221.5                  | -3.0412          |
| 221                    | -3.13459         |
| 220.5                  | -3.13486         |
| 220                    | -3.1969          |
| 219.5                  | -3.17366         |
| 219                    | -3.2287          |
| 218.5                  | -3.34293         |
| 218                    | -3.25812         |
| 217.5                  | -3.27514         |
| 217                    | -3.42239         |
| 216.5                  | -3.54212         |
| 216                    | -3.61422         |
| 215.5                  | -3.60352         |
| 215                    | -3.60034         |
| 214.5                  | -3.53252         |
| 214                    | -3.55986         |
| 213.5                  | -3.55932         |
| 213                    | -3.68448         |
| 212.5                  | -3.76709         |
| 212                    | -3.6864          |
| 211.5                  | -3.6934          |

| <b>Wavelength (nm)</b> | <b>CD (mdeg)</b> |
|------------------------|------------------|
| 211                    | -3.68824         |
| 210.5                  | -3.63003         |
| 210                    | -3.6286          |
| 209.5                  | -3.55444         |
| 209                    | -3.53782         |
| 208.5                  | -3.50163         |
| 208                    | -3.4257          |
| 207.5                  | -3.36125         |
| 207                    | -3.34708         |
| 206.5                  | -3.16491         |
| 206                    | -2.97628         |
| 205.5                  | -2.81102         |
| 205                    | -2.66173         |
| 204.5                  | -2.48741         |
| 204                    | -2.24661         |
| 203.5                  | -1.93502         |
| 203                    | -1.62853         |
| 202.5                  | -1.26665         |
| 202                    | -0.9005          |
| 201.5                  | -0.46838         |
| 201                    | -0.0534          |
| 200.5                  | 0.418504         |
| 200                    | 0.857472         |
| 199.5                  | 1.39156          |
| 199                    | 1.82096          |
| 198.5                  | 2.30547          |
| 198                    | 2.7436           |
| 197.5                  | 3.21379          |
| 197                    | 3.67389          |
| 196.5                  | 4.10429          |

| <b>Wavelength (nm)</b> | <b>CD (mdeg)</b> |
|------------------------|------------------|
| 196                    | 4.51021          |
| 195.5                  | 4.73912          |
| 195                    | 5.01079          |
| 194.5                  | 5.28736          |
| 194                    | 5.48059          |
| 193.5                  | 5.7101           |
| 193                    | 5.71539          |
| 192.5                  | 5.78238          |
| 192                    | 5.92154          |
| 191.5                  | 5.96635          |
| 191                    | 6.05968          |
| 190.5                  | 5.9902           |
| 190                    | 6.03496          |

**Table S3.** CD spectral data of the inhibitor solution in water containing DMSO in the absence of enzyme.

| <b>Wavelength (nm)</b> | <b>CD (mdeg)</b> |
|------------------------|------------------|
| 260                    | 1.1963           |
| 259.5                  | 1.19802          |
| 259                    | 1.1982           |
| 258.5                  | 1.20673          |
| 258                    | 1.16295          |
| 257.5                  | 1.09961          |
| 257                    | 1.08518          |
| 256.5                  | 1.10869          |
| 256                    | 1.10527          |
| 255.5                  | 1.0702           |
| 255                    | 1.04418          |
| 254.5                  | 0.993123         |
| 254                    | 0.9929           |

| <b>Wavelength (nm)</b> | <b>CD (mdeg)</b> |
|------------------------|------------------|
| 253.5                  | 1.01156          |
| 253                    | 0.972287         |
| 252.5                  | 0.95024          |
| 252                    | 0.920639         |
| 251.5                  | 0.936825         |
| 251                    | 0.926388         |
| 250.5                  | 0.97096          |
| 250                    | 1.02373          |
| 249.5                  | 1.07491          |
| 249                    | 1.04214          |
| 248.5                  | 1.05364          |
| 248                    | 1.08169          |
| 247.5                  | 1.13542          |
| 247                    | 1.13507          |
| 246.5                  | 1.11929          |
| 246                    | 1.13051          |
| 245.5                  | 1.11745          |
| 245                    | 1.11939          |
| 244.5                  | 1.07691          |
| 244                    | 1.00911          |
| 243.5                  | 0.878117         |
| 243                    | 0.784745         |
| 242.5                  | 0.779528         |
| 242                    | 0.72541          |
| 241.5                  | 0.597201         |
| 241                    | 0.488612         |
| 240.5                  | 0.429016         |
| 240                    | 0.30033          |
| 239.5                  | 0.247962         |
| 239                    | 0.205678         |
| 238.5                  | 0.180211         |

| <b>Wavelength (nm)</b> | <b>CD (mdeg)</b> |
|------------------------|------------------|
| 238                    | 0.091691         |
| 237.5                  | -0.01252         |
| 237                    | -0.05811         |
| 236.5                  | -0.14555         |
| 236                    | -0.24777         |
| 235.5                  | -0.31106         |
| 235                    | -0.30598         |
| 234.5                  | -0.49671         |
| 234                    | -0.62714         |
| 233.5                  | -0.64007         |
| 233                    | -0.76206         |
| 232.5                  | -0.91259         |
| 232                    | -1.08762         |
| 231.5                  | -1.17577         |
| 231                    | -1.25956         |
| 230.5                  | -1.32298         |
| 230                    | -1.31352         |
| 229.5                  | -1.35574         |
| 229                    | -1.38129         |
| 228.5                  | -1.5988          |
| 228                    | -1.50233         |
| 227.5                  | -1.33652         |
| 227                    | -1.42413         |
| 226.5                  | -1.33822         |
| 226                    | -1.06087         |
| 225.5                  | -1.03964         |
| 225                    | -0.88397         |
| 224.5                  | -0.77679         |
| 224                    | -0.82783         |
| 223.5                  | -0.56831         |
| 223                    | -0.15279         |

| <b>Wavelength (nm)</b> | <b>CD (mdeg)</b> |
|------------------------|------------------|
| 222.5                  | 0.25508          |
| 222                    | 0.679651         |
| 221.5                  | 1.04706          |
| 221                    | 1.23776          |
| 220.5                  | 1.25732          |
| 220                    | 1.9003           |
| 219.5                  | 2.06704          |
| 219                    | 2.12142          |
| 218.5                  | 2.54505          |
| 218                    | 2.8199           |
| 217.5                  | 3.25677          |
| 217                    | 3.52899          |
| 216.5                  | 3.58734          |
| 216                    | 3.30788          |
| 215.5                  | 2.94046          |
| 215                    | 3.05161          |
| 214.5                  | 3.36373          |
| 214                    | 2.65477          |
| 213.5                  | 2.06609          |
| 213                    | 1.45921          |
| 212.5                  | 1.63032          |
| 212                    | 1.71812          |
| 211.5                  | 1.92864          |
| 211                    | 1.7839           |
| 210.5                  | 1.60022          |
| 210                    | 1.43445          |
| 209.5                  | 1.14506          |
| 209                    | 2.30544          |
| 208.5                  | 2.74118          |
| 208                    | 3.26309          |
| 207.5                  | 4.54237          |

| <b>Wavelength (nm)</b> | <b>CD (mdeg)</b> |
|------------------------|------------------|
| 207                    | 5.68096          |
| 206.5                  | 6.92148          |
| 206                    | 7.27819          |
| 205.5                  | 7.82798          |
| 205                    | 7.69413          |
| 204.5                  | 7.35949          |
| 204                    | 8.6152           |
| 203.5                  | 9.49045          |
| 203                    | 10.6722          |
| 202.5                  | 10.9402          |
| 202                    | 11.9375          |
| 201.5                  | 11.9339          |
| 201                    | 12.207           |
| 200.5                  | 12.6552          |
| 200                    | 12.4207          |
| 199.5                  | 12.3234          |
| 199                    | 13.2958          |
| 198.5                  | 14.1087          |
| 198                    | 16.1749          |
| 197.5                  | 17.6393          |
| 197                    | 19.0784          |
| 196.5                  | 18.8805          |
| 196                    | 19.5819          |
| 195.5                  | 14.5158          |
| 195                    | 15.0761          |
| 194.5                  | 14.7716          |
| 194                    | 9.67434          |
| 193.5                  | 7.61862          |
| 193                    | 10.5225          |
| 192.5                  | 15.5618          |
| 192                    | 15.1041          |

| <b>Wavelength (nm)</b> | <b>CD (mdeg)</b> |
|------------------------|------------------|
| 191.5                  | 15.2314          |
| 191                    | 8.63095          |
| 190.5                  | 1.54781          |
| 190                    | -6.44348         |

**Table S4.** CD spectral data of the inhibitor solution in water containing DMSO and enzyme.

| <b>Wavelength (nm)</b> | <b>CD (mdeg)</b> |
|------------------------|------------------|
| 260                    | 2.2767514        |
| 259.5                  | 2.3069354        |
| 259                    | 2.237158         |
| 258.5                  | 2.253867         |
| 258                    | 2.1894488        |
| 257.5                  | 2.2009526        |
| 257                    | 2.0755504        |
| 256.5                  | 2.0953394        |
| 256                    | 2.0141506        |
| 255.5                  | 1.9957322        |
| 255                    | 1.987216         |
| 254.5                  | 1.9600966        |
| 254                    | 1.9108936        |
| 253.5                  | 1.9128648        |
| 253                    | 1.8779684        |
| 252.5                  | 1.8312448        |
| 252                    | 1.82182          |
| 251.5                  | 1.7945312        |
| 251                    | 1.7260012        |
| 250.5                  | 1.6288118        |
| 250                    | 1.51670288       |
| 249.5                  | 1.4730947        |
| 249                    | 1.42215304       |

| <b>Wavelength (nm)</b> | <b>CD (mdeg)</b> |
|------------------------|------------------|
| 248.5                  | 1.43602074       |
| 248                    | 1.32782958       |
| 247.5                  | 1.20869518       |
| 247                    | 1.19974778       |
| 246.5                  | 1.1692296        |
| 246                    | 1.12660394       |
| 245.5                  | 1.04859986       |
| 245                    | 0.98433412       |
| 244.5                  | 0.90311606       |
| 244                    | 0.95630766       |
| 243.5                  | 1.02934678       |
| 243                    | 1.05521878       |
| 242.5                  | 1.06718766       |
| 242                    | 0.99936914       |
| 241.5                  | 0.8906051        |
| 241                    | 0.93702224       |
| 240.5                  | 0.85060052       |
| 240                    | 0.76692154       |
| 239.5                  | 0.68434674       |
| 239                    | 0.67789106       |
| 238.5                  | 0.58908234       |
| 238                    | 0.52939194       |
| 237.5                  | 0.37997806       |
| 237                    | 0.12623688       |
| 236.5                  | -0.1028566       |
| 236                    | -0.2917376       |
| 235.5                  | -0.4590894       |
| 235                    | -0.6936622       |
| 234.5                  | -0.9013774       |
| 234                    | -1.0620456       |
| 233.5                  | -1.2736262       |

| <b>Wavelength (nm)</b> | <b>CD (mdeg)</b> |
|------------------------|------------------|
| 233                    | -1.4923832       |
| 232.5                  | -1.7027934       |
| 232                    | -1.9900034       |
| 231.5                  | -2.072224        |
| 231                    | -2.2534974       |
| 230.5                  | -2.4160444       |
| 230                    | -2.609915        |
| 229.5                  | -2.74197         |
| 229                    | -2.9624056       |
| 228.5                  | -3.1149272       |
| 228                    | -3.2610424       |
| 227.5                  | -3.3848892       |
| 227                    | -3.5910798       |
| 226.5                  | -3.6907332       |
| 226                    | -3.898895        |
| 225.5                  | -3.9439862       |
| 225                    | -4.0639522       |
| 224.5                  | -4.4034144       |
| 224                    | -4.4459338       |
| 223.5                  | -4.4316888       |
| 223                    | -4.4076494       |
| 222.5                  | -4.5516856       |
| 222                    | -4.5836406       |
| 221.5                  | -4.683448        |
| 221                    | -4.8272686       |
| 220.5                  | -4.8276844       |
| 220                    | -4.923226        |
| 219.5                  | -4.8874364       |
| 219                    | -4.972198        |
| 218.5                  | -5.1481122       |
| 218                    | -5.0175048       |

| <b>Wavelength (nm)</b> | <b>CD (mdeg)</b> |
|------------------------|------------------|
| 217.5                  | -5.0437156       |
| 217                    | -5.2704806       |
| 216.5                  | -5.4548648       |
| 216                    | -5.5658988       |
| 215.5                  | -5.5494208       |
| 215                    | -5.5445236       |
| 214.5                  | -5.4400808       |
| 214                    | -5.4821844       |
| 213.5                  | -5.4813528       |
| 213                    | -5.6740992       |
| 212.5                  | -5.8013186       |
| 212                    | -5.677056        |
| 211.5                  | -5.687836        |
| 211                    | -5.6798896       |
| 210.5                  | -5.5902462       |
| 210                    | -5.588044        |
| 209.5                  | -5.4738376       |
| 209                    | -5.4482428       |
| 208.5                  | -5.3925102       |
| 208                    | -5.275578        |
| 207.5                  | -5.176325        |
| 207                    | -5.1545032       |
| 206.5                  | -4.8739614       |
| 206                    | -4.5834712       |
| 205.5                  | -4.3289708       |
| 205                    | -4.0990642       |
| 204.5                  | -3.8306114       |
| 204                    | -3.4597794       |
| 203.5                  | -2.9799308       |
| 203                    | -2.5079362       |
| 202.5                  | -1.950641        |

| <b>Wavelength (nm)</b> | <b>CD (mdeg)</b> |
|------------------------|------------------|
| 202                    | -1.38677         |
| 201.5                  | -0.7213052       |
| 201                    | -0.082236        |
| 200.5                  | 0.64449616       |
| 200                    | 1.32050688       |
| 199.5                  | 2.1430024        |
| 199                    | 2.8042784        |
| 198.5                  | 3.5504238        |
| 198                    | 4.225144         |
| 197.5                  | 4.9492366        |
| 197                    | 5.6577906        |
| 196.5                  | 6.3206066        |
| 196                    | 6.9457234        |
| 195.5                  | 7.2982448        |
| 195                    | 7.7166166        |
| 194.5                  | 8.1425344        |
| 194                    | 8.4401086        |
| 193.5                  | 8.793554         |
| 193                    | 8.8017006        |
| 192.5                  | 8.9048652        |
| 192                    | 9.1191716        |
| 191.5                  | 9.188179         |
| 191                    | 9.3319072        |
| 190.5                  | 9.224908         |
| 190                    | 9.2938384        |

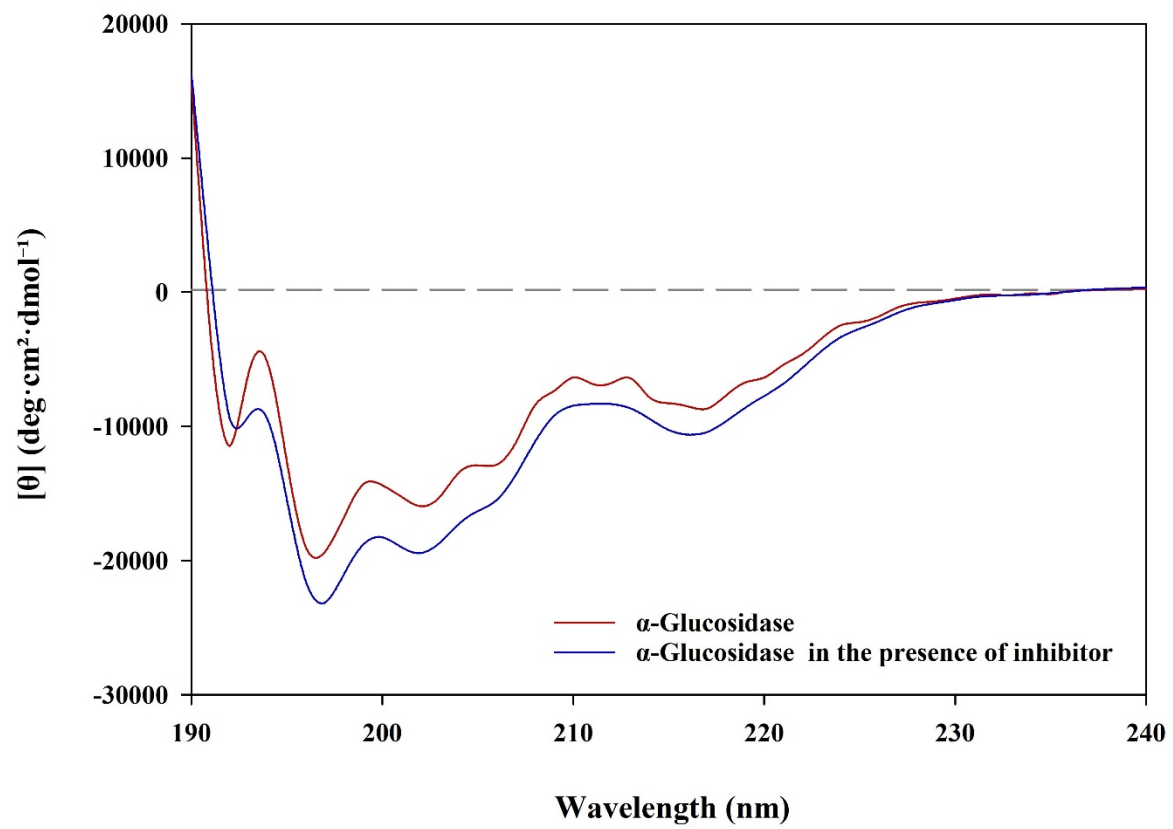

**Figure S-4.** Circular dichroism (CD) spectra of  $\alpha$ -glucosidase in the absence and presence of inhibitor.

## Nitrosamine risk assessment for each and every step of the reactions

### Step (a)

**Reaction:** Knoevenagel condensation

**Reagents:** Diethyl malonate, piperidine, absolute EtOH, reflux, 4h

Although piperidine is a secondary amine and in the presence of a nitrosating agent, it can form N-Nitrosopiperidine (NPIP) [1]. Since the reaction took place under basic conditions (piperidine-catalyzed condensation), nitrosation is kinetically unfavorable. Furthermore, the subsequent work-up and the harsh saponification conditions in the next step ( $\text{NaOH}_{(\text{aq})}$ , reflux) ensure that any potential volatile nitrosamine impurity is washed away.

### Step (b)

**Reaction:** Alkaline ester hydrolysis

**Reagents:** NaOH (10% aq.), EtOH, reflux, 2h

No amine was used in this step. Industrial-grade NaOH can contain trace nitrite as an impurity, but pharmaceutical grade material (used in our laboratory) is very low in nitrites. Moreover, the use of 10% NaOH causes the destruction of any nitrites formed in the previous step.

### Step (c)

**Reaction:** Amidation

**Reagents:** Propargylamine, TBTU, DIPEA, DMF, r.t., overnight

Propargylamine may form unstable N-nitrosopropargylamine, which rapidly deaminates. DIPEA (N,N-Diisopropylethylamine) is a tertiary amine, which is not directly nitrosatable. DMF, however, can degrade to dimethylamine (secondary amine), that is a precursor to the potent nitrosamine NDMA. Since the conditions are mild (r.t.) in this step, the basic reaction environment made nitrosation extremely unlikely. The aqueous work-up and purification processes remove any volatile amine impurities.

### Step (d)

**Reaction:** Chloroacetylation

**Reagents:** Chloroacetyl chloride, TEA, acetone, r.t., overnight

Triethylamine (TEA) is a tertiary amine and therefore not directly nitrosatable. Nitrosation requires a secondary amine to form a stable N-nitrosamine. TEA can contain traces of diethylamine (a secondary amine) as a manufacturing impurity or degradation product. If present, diethylamine could theoretically form N-nitrosodiethylamine (NDEA). However, the basic reaction environment prevents nitrosation, and the subsequent water wash effectively remove any trace amine impurities.

### Step (e)

**Reaction:** Nucleophilic azidation

**Reagents:** Sodium azide, DMF, r.t., overnight

No secondary or tertiary amine is deliberately added. DMF decomposition to dimethylamine is negligible at room temperature. Even if trace dimethylamine and nitrite collided, the neutral pH kinetically blocks nitrosation. Aqueous work-up removes any volatile amines.

### Step (f)

**Reaction:** Click reaction

**Reagents:**  $\text{CuSO}_4 \cdot 5\text{H}_2\text{O}$ , sodium ascorbate, DMF, r.t., overnight

Same as the previous step, the absence of any added secondary amine and the negligible DMF degradation at room temperature prevent any direct nitrosamine formation pathway. Therefore, this step does not present a nitrosamine risk.

A thorough, stepwise evaluation of the synthetic route to the coumarin–triazole conjugates was performed, focusing on the potential formation of nitrosamines from secondary amines (piperidine, diethylamine from TEA, dimethylamine from DMF) in the presence of nitrosating agents. Considering the reaction conditions and purification processes, the likelihood of nitrosamine formation and its presence in the final coumarin–triazole conjugates is negligible. Moreover, the NMR graph of the final compounds don't show peaks related to such nitrosamines.

**References:**

1. De Mey, E., De Maere, H., Goemaere, O., Steen, L., Peeters, M.-C., Derdelinckx, G., Paelinck, H., Fraeye, I. (2014). Evaluation of N-nitrosopiperidine formation from biogenic amines during the production of dry fermented sausages. Food and bioprocess technology, 7: 1269-1280. <https://doi.org/10.1007/s11947-013-1125-5>.
